# Supplementary material for: New Mycobacterium tuberculosis Beijing clonal complexes in China revealed by phylogenetic and Bayesian population structure analyses of 24-loci MIRU-VNTRs
Source: PubMed Central journal article supplement (PMC5519585; doi:10.1038/s41598-017-06346-1), 2017-07-20
Supplement: 41598_2017_6346_MOESM1_ESM.pdf [file 41598_2017_6346_MOESM1_ESM.pdf]

1 **Supporting Information**

2

3 **Title:**

4 **New *Mycobacterium tuberculosis* Beijing clonal complexes in China revealed by phylogenetic and**  
5 **Bayesian population structure analyses of 24-loci MIRU-VNTRs**

6

7 **Authors:**

8 Chao Zheng<sup>1,2</sup>, Yann Reynaud<sup>2\*</sup>, Changsong Zhao<sup>1</sup>, Thierry Zozio<sup>2</sup>, Song Li<sup>1</sup>, Dongxia Luo<sup>3</sup>, Qun  
9 Sun<sup>1\*\*</sup> and Nalin Rastogi<sup>2\*</sup>

10

11 **Table S1. Data collection references in this study. Please refer to Table S2 for detailed 24-loci**  
 12 **MIRU-VNTR data.**  
 13

| Serial No. | No. of isolates  | MIRU-VNTR data format |         |         |            | Spoligotyping data | Reference                                                                                                                                                                                                                                              | PubMed ID (PMID) | Data availability in SITVIT2 database |
|------------|------------------|-----------------------|---------|---------|------------|--------------------|--------------------------------------------------------------------------------------------------------------------------------------------------------------------------------------------------------------------------------------------------------|------------------|---------------------------------------|
|            |                  | 12 loci               | 15 loci | 24 loci | other sets |                    |                                                                                                                                                                                                                                                        |                  |                                       |
| 1          | 576 <sup>a</sup> | X <sup>b</sup>        | X       | X       |            | X                  | Dong, H. <i>et al.</i> Genetic diversity of <i>Mycobacterium tuberculosis</i> isolates from Tibetans in Tibet, China. <i>PLoS one.</i> <b>7</b> , e33904 (2012).                                                                                       | 22479472         |                                       |
| 2          | 338              | X                     | X       | X       |            |                    | Chen, Y. <i>et al.</i> Genetic diversity of the <i>Mycobacterium tuberculosis</i> Beijing family based on SNP and VNTR typing profiles in asian countries. <i>PLoS one.</i> <b>7</b> , e39792 (2012).                                                  | 22808061         |                                       |
| 3          | 306              | X                     | X       | X       |            | X                  | Zhao, Y. <i>et al.</i> The population structure of drug-resistant <i>Mycobacterium tuberculosis</i> clinical isolates from Sichuan in China. <i>Infect. Genet. Evol.</i> <b>12</b> , 718-724 (2012).                                                   | 21989209         | X                                     |
| 4          | 297              | X                     | X       | X       |            | X                  | Zhang, D. <i>et al.</i> Molecular typing and drug susceptibility of <i>Mycobacterium tuberculosis</i> isolates from Chongqing municipality, China. <i>Infect. Genet. Evol.</i> <b>13</b> , 310-316 (2013).                                             | 23183314         |                                       |
| 5          | 193              | X                     | X       | X       |            | X                  | Unpublished data from Sichuan <sup>c</sup>                                                                                                                                                                                                             |                  |                                       |
| 6          | 72               | X                     | X       | X       |            |                    | Jiao, W. W. <i>et al.</i> Evaluation of new variable-number tandem-repeat systems for typing <i>Mycobacterium tuberculosis</i> with Beijing genotype isolates from Beijing, China. <i>J. Clin. Microbiol.</i> <b>46</b> , 1045-1049 (2008).            | 18199785         |                                       |
| 7          | 55               | X                     | X       | X       |            |                    | Zhang, J. <i>et al.</i> Genotypes and drug susceptibility of <i>Mycobacterium tuberculosis</i> isolates in Shihezi, Xinjiang province, China. <i>BMC. Res. Notes.</i> <b>5</b> , 309 (2012).                                                           | 22713520         |                                       |
| 8          | 84               | X                     | X       | X       |            | X                  | Hu, Y. <i>et al.</i> Acquisition of second-line drug resistance and extensive drug resistance during recent transmission of <i>Mycobacterium tuberculosis</i> in rural China. <i>Clin. Microbiol. Infect.</i> <b>21</b> , 1093.e9-1093.e18 (2015).     | 26348262         |                                       |
| 9          | 372              |                       | X       |         | X          | X                  | Yu, Q. <i>et al.</i> Genetic diversity of <i>Mycobacterium tuberculosis</i> isolates from Inner Mongolia, China. <i>PLoS one.</i> <b>8</b> , e57660 (2013).                                                                                            | 23658680         |                                       |
| 10         | 260              | X                     | X       |         | X          | X                  | Liu, Q. <i>et al.</i> Molecular typing of <i>Mycobacterium tuberculosis</i> isolates circulating in Jiangsu province, China. <i>BMC. Infect. Dis.</i> <b>11</b> , 288 (2011).                                                                          | 22026819         |                                       |
| 11         | 260              |                       | X       |         | X          | X                  | Lu, B. <i>et al.</i> Genetic diversity of <i>Mycobacterium tuberculosis</i> isolates from Beijing, China assessed by spoligotyping, LSPs and VNTR profiles. <i>BMC. Infect. Dis.</i> <b>12</b> , 372 (2012).                                           | 23259861         |                                       |
| 12         | 123              |                       | X       |         |            |                    | Yuan, X. <i>et al.</i> Genotyping and clinical characteristics of multidrug and extensively drug-resistant tuberculosis in a tertiary care tuberculosis hospital in China. <i>BMC. Infect. Dis.</i> <b>13</b> , 315 (2013).                            | 23849244         |                                       |
| 13         | 123              | X                     |         |         | X          | X                  | Chen, L. <i>et al.</i> Genetic diversity and drug susceptibility of <i>Mycobacterium tuberculosis</i> isolates from Zunyi, one of the highest-incidence-rate areas in China. <i>J. Clin. Microbiol.</i> <b>50</b> , 1043-1047 (2011).                  | 22205809         | X                                     |
| 14         | 364              | X                     |         |         |            |                    | Sun, J. R. <i>et al.</i> Epidemiological studies of Beijing strains of <i>Mycobacterium tuberculosis</i> from Taipei and other asian cities based on MIRU profiles. <i>APMIS.</i> <b>119</b> , 581-587 (2011).                                         | 21851415         |                                       |
| 15         | 315              | X                     |         |         |            |                    | Dou, H. Y. <i>et al.</i> Molecular epidemiology and evolutionary genetics of <i>Mycobacterium tuberculosis</i> in Taipei. <i>BMC. Infect. Dis.</i> <b>8</b> , 170 (2008).                                                                              | 19102768         |                                       |
| 15         | 349              |                       |         |         |            | X                  | Dou, H. Y. <i>et al.</i> Molecular epidemiology and evolutionary genetics of <i>Mycobacterium tuberculosis</i> in Taipei. <i>BMC. Infect. Dis.</i> <b>8</b> , 170 (2008).                                                                              | 19102768         |                                       |
| 16         | 211              | X                     |         |         |            |                    | Kam, K. M. <i>et al.</i> Utility of mycobacterial interspersed repetitive unit typing for differentiating multidrug-resistant <i>Mycobacterium tuberculosis</i> isolates of the Beijing family. <i>J. Clin. Microbiol.</i> <b>43</b> , 306-313 (2005). | 15634987         |                                       |

|    |                   |   |   |   |                                                                                                                                                                                                                                                                                                                     |          |   |
|----|-------------------|---|---|---|---------------------------------------------------------------------------------------------------------------------------------------------------------------------------------------------------------------------------------------------------------------------------------------------------------------------|----------|---|
| 17 | 186               | X |   | X | Chen, Y. <i>et al.</i> Potential challenges to the stop TB plan for humans in China; cattle maintain <i>M. bovis</i> and <i>M. tuberculosis</i> . <i>Tuberculosis</i> . <b>89</b> , 95-100 (2009).                                                                                                                  | 19056318 |   |
| 18 | 105               | X |   | X | Han, H. <i>et al.</i> Utility of mycobacterial interspersed repetitive unit typing for differentiating <i>Mycobacterium tuberculosis</i> isolates in Wuhan, China. <i>J. Med. Microbiol.</i> <b>56</b> , 1219-1223 (2007).                                                                                          | 17761486 |   |
| 19 | 103               | X |   |   | Xing, L. <i>et al.</i> Clinical and genotypic characteristics of childhood tuberculosis in Chongqing, China. <i>Eur. J. Clin. Microbiol. Infect. Dis.</i> <b>31</b> , 1735-1739 (2012).                                                                                                                             | 22161015 |   |
| 20 | 89                | X |   |   | Guo, J. <i>et al.</i> Mycobacterial interspersed repetitive unit typing in <i>Mycobacterium tuberculosis</i> isolates from Sichuan province in China. <i>Indian. J. Med. Res.</i> <b>134</b> , 362-368 (2011).                                                                                                      | 21985820 |   |
| 21 | 88                | X |   |   | Pang, Y. <i>et al.</i> A novel method based on high resolution melting (HRM) analysis for MIRU-VNTR genotyping of <i>Mycobacterium tuberculosis</i> . <i>J. Microbiol. Methods.</i> <b>86</b> , 291-297 (2011).                                                                                                     | 21689691 |   |
| 22 | 71                | X |   |   | Zhou, A. <i>et al.</i> Molecular genotyping of <i>Mycobacterium tuberculosis</i> in Xi'an, China, using MIRU-VNTR typing. <i>Int. J. Tuberc. Lung. Dis.</i> <b>15</b> , 517-522 (2011).                                                                                                                             | 21396212 |   |
| 22 | 195               |   |   | X | Zhou, A. <i>et al.</i> Molecular genotyping of <i>Mycobacterium tuberculosis</i> in Xi'an, China, using MIRU-VNTR typing. <i>Int. J. Tuberc. Lung. Dis.</i> <b>15</b> , 517-522 (2011).                                                                                                                             | 21396212 |   |
| 23 | 1586 <sup>d</sup> |   | X | X | Liu, Y. <i>et al.</i> Genotypic diversity analysis of <i>Mycobacterium tuberculosis</i> strains collected from Beijing in 2009, using spoligotyping and VNTR typing. <i>PLoS one.</i> <b>9</b> , e106787 (2014).                                                                                                    | 25237849 |   |
| 24 | 467               |   | X | X | Liu, J. <i>et al.</i> First insight into the genotypic diversity of clinical <i>Mycobacterium tuberculosis</i> isolates from Gansu province, China. <i>PLoS one.</i> <b>9</b> , e99357 (2014).                                                                                                                      | 24911588 |   |
| 25 | 69                |   | X | X | Kremer, K. <i>et al.</i> Use of variable-number tandem-repeat typing to differentiate <i>Mycobacterium tuberculosis</i> Beijing family isolates from Hong Kong and comparison with IS6110 restriction fragment length polymorphism typing and spoligotyping. <i>J. Clin. Microbiol.</i> <b>43</b> , 314-320 (2005). | 15634988 |   |
| 26 | 64                |   | X | X | Liu, J. <i>et al.</i> Molecular characteristics and drug susceptibility of <i>Mycobacterium tuberculosis</i> isolates from patients co-infected with human immunodeficiency virus in Beijing, China. <i>Biomed. Environ. Sci.</i> <b>28</b> , 222-226 (2015).                                                       | 25800448 |   |
| 27 | 3006              |   |   | X | Pang, Y. <i>et al.</i> Spoligotyping and drug resistance analysis of <i>Mycobacterium tuberculosis</i> strains from national survey in China. <i>PLoS one.</i> <b>7</b> , e32976 (2012).                                                                                                                            | 22412962 |   |
| 28 | 2346              |   |   | X | Dong, H. <i>et al.</i> Spoligotypes of <i>Mycobacterium tuberculosis</i> from different provinces of China. <i>J. Clin. Microbiol.</i> <b>48</b> , 4102-4106 (2010).                                                                                                                                                | 20739484 | X |
| 29 | 497               |   |   | X | Lu, W. <i>et al.</i> Genotypes of <i>Mycobacterium tuberculosis</i> isolates in rural China: using MIRU-VNTR and spoligotyping methods. <i>Scand. J. Infect. Dis.</i> <b>46</b> , 98-106 (2014).                                                                                                                    | 24359517 |   |
| 30 | 287               |   |   | X | Pang, H. <i>et al.</i> Molecular characterization and drug-resistance of <i>Mycobacterium tuberculosis</i> strains in Xuzhou, China. <i>Biomed. Environ. Sci.</i> <b>27</b> , 960-964 (2014).                                                                                                                       | 25484012 |   |
| 31 | 230               |   |   | X | Li, X. <i>et al.</i> Non-Beijing strains of <i>Mycobacterium tuberculosis</i> in China. <i>J. Clin. Microbiol.</i> <b>49</b> , 392-395 (2010).                                                                                                                                                                      | 21068281 | X |
| 32 | 207               |   |   | X | Zhang, D. <i>et al.</i> Genetic diversity of multidrug-resistant tuberculosis in a resource-limited region of China. <i>Int. J. Infect. Dis.</i> <b>29</b> , 7-11 (2014).                                                                                                                                           | 25312982 |   |
| 33 | 206               |   |   | X | Jiang, Y. <i>et al.</i> 19-VNTR loci used in genotyping Chinese clinical <i>Mycobacterium tuberculosis</i> complex strains and in association with spoligotyping. <i>J. Basic. Microbiol.</i> <b>53</b> , 562-580 (2013).                                                                                           | 23322548 |   |

|    |      |   |                                                                                                                                                                                                                                                                                |          |   |
|----|------|---|--------------------------------------------------------------------------------------------------------------------------------------------------------------------------------------------------------------------------------------------------------------------------------|----------|---|
| 34 | 131  | X | Hu, Y. <i>et al.</i> Extensive transmission of isoniazid resistant <i>M. tuberculosis</i> and its association with increased multidrug-resistant TB in two rural counties of eastern China: a molecular epidemiological study. <i>BMC. Infect. Dis.</i> <b>10</b> , 43 (2010). | 20187977 |   |
| 35 | 89   | X | Zhou, A. <i>et al.</i> Molecular characterization of isoniazid-resistant <i>Mycobacterium tuberculosis</i> isolates from Xi'an, China. <i>Microb. Drug. Resist.</i> <b>17</b> , 275-281 (2011).                                                                                | 21388297 |   |
| 36 | 67   | X | Data extracted from the SITVIT2 database.                                                                                                                                                                                                                                      |          | X |
| 37 | 44   | X | Wang, J. <i>et al.</i> Genotypes and characteristics of clustering and drug susceptibility of <i>Mycobacterium tuberculosis</i> isolates collected in Heilongjiang province, China. <i>J. Clin. Microbiol.</i> <b>49</b> , 1354-1362 (2011).                                   | 21325562 |   |
| 38 | 40   | X | Dou, H. Y. <i>et al.</i> Associations of <i>Mycobacterium tuberculosis</i> genotypes with different ethnic and migratory populations in Taiwan. <i>Infect. Genet. Evol.</i> <b>8</b> , 323-330 (2008).                                                                         | 18378194 |   |
| 39 | 33   | X | Chen, Y. Y. <i>et al.</i> Molecular epidemiology of <i>Mycobacterium tuberculosis</i> in aboriginal peoples of Taiwan, 2006-2011. <i>J. Infect.</i> <b>68</b> , 332-337 (2014).                                                                                                | 24370561 |   |
| 40 | 1586 | X | Wan, K. <i>et al.</i> Investigation on <i>Mycobacterium tuberculosis</i> diversity in China and the origin of the Beijing clade. <i>PLoS one.</i> <b>6</b> , e29190 (2011).                                                                                                    | 22220207 |   |

14 <sup>a</sup> Among 576 isolates, both 24-loci MIRU-VNTRs data and spoligotyping data were available for a total of 517  
15 isolates, and 59 isolates had spoligotyping data only.

16 <sup>b</sup> The letter "X" denotes availability of data.

17 <sup>c</sup> Study carried out in Key Laboratory of Bio-resources and Eco-environment of the Ministry of Education,  
18 College of Life Sciences, Sichuan University, Chengdu, Sichuan 610065, P. R. China; Contact: Qun sun, E-mail:  
19 [qunsun@scu.edu.cn](mailto:qunsun@scu.edu.cn)

20 <sup>d</sup> Among 1586 isolates, spoligotyping data were available for all except one strain, and a subset of 1053 isolates  
21 was further analyzed by MIRU-VNTRs (including the strain missing spoligotyping data).

22

23 **Table S2. 24-loci MIRU-VNTRs genotyping results of the *M. tuberculosis* Beijing isolates**  
 24 **(n=1490).**  
 25

| Strain Number | Year | Reference & PMID            | Population assigned | Region of Isolation | Latitude | Longitude | 154 | 580 | 960 | 1644 | 2059 | 2531 | 2687 | 2996 | 3007 | 3192 | 4348 | 802 | 2165 | 2461 | 577 | 2163b | 4052 | 4156 | 424 | 1955 | 2347 | 2401 | 3171 | 3690 |
|---------------|------|-----------------------------|---------------------|---------------------|----------|-----------|-----|-----|-----|------|------|------|------|------|------|------|------|-----|------|------|-----|-------|------|------|-----|------|------|------|------|------|
| B1            | 2011 | Zhang, D. et al. & 23183314 | BSP2                | Chongqing           | 29.56    | 106.55    | 2   | 3   | 3   | 3    | 4    | 5    | 2    | 6    | 3    | 4    | 3    | 3   | 4    | 2    | 4   | 6     | 9    | 3    | 4   | 4    | 4    | 4    | 3    | 4    |
| B2            | 2011 | Zhang, D. et al. & 23183314 | BSP2                | Chongqing           | 29.56    | 106.55    | 2   | 3   | 3   | 3    | 4    | 5    | 2    | 7    | 3    | 5    | 4    | 3   | 4    | 2    | 4   | 6     | 9    | 3    | 4   | 4    | 4    | 4    | 3    | 4    |
| B3            | 2011 | Zhang, D. et al. & 23183314 | BSP2                | Chongqing           | 29.56    | 106.55    | 2   | 3   | 3   | 3    | 4    | 5    | 2    | 7    | 3    | 5    | 3    | 3   | 4    | 2    | 4   | 6     | 9    | 3    | 4   | 1    | 4    | 4    | 3    | 4    |
| B4            | 2011 | Zhang, D. et al. & 23183314 | BSP2                | Chongqing           | 29.56    | 106.55    | 2   | 3   | 3   | 3    | 4    | 5    | 2    | 5    | 3    | 5    | 3    | 4   | 4    | 2    | 3   | 6     | 9    | 3    | 4   | 4    | 4    | 4    | 3    | 4    |
| B5            | 2011 | Zhang, D. et al. & 23183314 | BSP2                | Chongqing           | 29.56    | 106.55    | 2   | 3   | 3   | 2    | 4    | 5    | 2    | 7    | 3    | 5    | 3    | 4   | 4    | 2    | 4   | 6     | 5    | 3    | 4   | 4    | 4    | 4    | 3    | 4    |
| B6            | 2011 | Zhang, D. et al. & 23183314 | BSP2                | Chongqing           | 29.56    | 106.55    | 2   | 3   | 3   | 2    | 4    | 5    | 2    | 7    | 3    | 5    | 3    | 3   | 4    | 2    | 4   | 6     | 5    | 3    | 4   | 4    | 4    | 4    | 3    | 4    |
| B7            | 2011 | Zhang, D. et al. & 23183314 | BSP2                | Chongqing           | 29.56    | 106.55    | 2   | 3   | 3   | 1    | 4    | 5    | 2    | 7    | 3    | 5    | 3    | 3   | 4    | 2    | 4   | 6     | 9    | 3    | 4   | 5    | 4    | 4    | 3    | 4    |
| B8            | 2011 | Zhang, D. et al. & 23183314 | BSP2                | Chongqing           | 29.56    | 106.55    | 2   | 3   | 3   | 3    | 4    | 5    | 2    | 7    | 3    | 5    | 3    | 3   | 4    | 2    | 3   | 6     | 9    | 3    | 4   | 4    | 4    | 4    | 3    | 4    |
| B9            | 2011 | Zhang, D. et al. & 23183314 | BSP2                | Chongqing           | 29.56    | 106.55    | 2   | 3   | 3   | 1    | 4    | 5    | 2    | 8    | 3    | 5    | 3    | 3   | 4    | 2    | 4   | 6     | 9    | 3    | 4   | 4    | 4    | 4    | 3    | 2    |
| B10           | 2011 | Zhang, D. et al. & 23183314 | BSP2                | Chongqing           | 29.56    | 106.55    | 2   | 3   | 3   | 2    | 4    | 5    | 2    | 7    | 3    | 4    | 3    | 3   | 4    | 2    | 4   | 6     | 9    | 3    | 4   | 4    | 4    | 4    | 3    | 4    |
| B11           | 2011 | Zhang, D. et al. & 23183314 | BSP2                | Chongqing           | 29.56    | 106.55    | 2   | 3   | 3   | 3    | 4    | 6    | 2    | 7    | 3    | 5    | 3    | 3   | 4    | 2    | 4   | 6     | 9    | 3    | 4   | 4    | 4    | 4    | 3    | 4    |
| B12           | 2011 | Zhang, D. et al. & 23183314 | BSP2                | Chongqing           | 29.56    | 106.55    | 2   | 1   | 3   | 3    | 4    | 5    | 2    | 7    | 3    | 5    | 3    | 4   | 4    | 2    | 4   | 5     | 5    | 3    | 4   | 4    | 4    | 4    | 3    | 4    |
| B13           | 2011 | Zhang, D. et al. & 23183314 | BSP2                | Chongqing           | 29.56    | 106.55    | 2   | 3   | 3   | 3    | 4    | 5    | 2    | 7    | 3    | 5    | 3    | 3   | 4    | 2    | 4   | 4     | 7    | 3    | 4   | 4    | 4    | 4    | 3    | 4    |
| B14           | 2011 | Zhang, D. et al. & 23183314 | BSP2                | Chongqing           | 29.56    | 106.55    | 2   | 3   | 3   | 3    | 4    | 5    | 2    | 7    | 3    | 5    | 3    | 3   | 4    | 2    | 4   | 6     | 8    | 3    | 4   | 4    | 4    | 4    | 3    | 4    |
| B15           | 2011 | Zhang, D. et al. & 23183314 | BSP2                | Chongqing           | 29.56    | 106.55    | 2   | 3   | 3   | 2    | 4    | 5    | 2    | 5    | 3    | 3    | 3    | 3   | 4    | 1    | 4   | 4     | 8    | 3    | 4   | 3    | 4    | 4    | 3    | 4    |
| B16           | 2011 | Zhang, D. et al. & 23183314 | BSP2                | Chongqing           | 29.56    | 106.55    | 2   | 3   | 2   | 3    | 4    | 5    | 2    | 7    | 3    | 5    | 3    | 3   | 4    | 2    | 4   | 6     | 8    | 3    | 5   | 4    | 4    | 4    | 3    | 4    |
| B17           | 2011 | Zhang, D. et al. & 23183314 | BSP2                | Chongqing           | 29.56    | 106.55    | 2   | 3   | 3   | 3    | 4    | 5    | 2    | 7    | 3    | 5    | 3    | 3   | 4    | 2    | 4   | 4     | 9    | 3    | 4   | 4    | 4    | 4    | 3    | 2    |
| B18           | 2011 | Zhang, D. et al. & 23183314 | BSP2                | Chongqing           | 29.56    | 106.55    | 2   | 3   | 2   | 3    | 4    | 5    | 2    | 7    | 3    | 4    | 3    | 4   | 3    | 2    | 4   | 4     | 9    | 3    | 4   | 4    | 4    | 4    | 3    | 2    |
| B19           | 2011 | Zhang, D. et al. & 23183314 | BSP2                | Chongqing           | 29.56    | 106.55    | 2   | 3   | 2   | 3    | 4    | 5    | 2    | 6    | 3    | 5    | 3    | 4   | 4    | 2    | 4   | 6     | ND   | 3    | 4   | 4    | 4    | 4    | 3    | 4    |
| B20           | 2011 | Zhang, D. et al. & 23183314 | BSP2                | Chongqing           | 29.56    | 106.55    | 2   | 3   | 3   | 3    | 4    | 5    | 2    | 6    | 3    | 3    | 3    | 3   | 4    | 2    | 4   | 3     | 9    | 3    | 4   | 3    | 4    | 4    | 3    | 4    |
| B21           | 2011 | Zhang, D. et al. & 23183314 | BSP2                | Chongqing           | 29.56    | 106.55    | 2   | 3   | 3   | 3    | 4    | 5    | 2    | 6    | 3    | 5    | 3    | 3   | 4    | 2    | 4   | 6     | 9    | 3    | 4   | 6    | 4    | 4    | 3    | 4    |
| B22           | 2011 | Zhang, D. et al. & 23183314 | BSP2                | Chongqing           | 29.56    | 106.55    | 2   | 3   | 3   | 3    | 4    | 5    | 2    | 5    | 3    | 3    | 3    | 4   | 4    | 2    | 4   | 4     | 8    | 3    | 4   | 3    | 4    | 4    | 3    | 4    |
| B23           | 2011 | Zhang, D. et al. & 23183314 | BSP2                | Chongqing           | 29.56    | 106.55    | 2   | 3   | 3   | 3    | 4    | 5    | 2    | 7    | 3    | 5    | 3    | 3   | 4    | 2    | 4   | 4     | 8    | 3    | 4   | 4    | 4    | 4    | 3    | 4    |
| B24           | 2011 | Zhang, D. et al. & 23183314 | BSP2                | Chongqing           | 29.56    | 106.55    | 2   | 3   | 3   | 3    | 4    | 5    | 2    | 7    | 3    | 5    | 3    | 3   | 4    | 2    | 4   | 6     | 7    | 3    | 4   | 4    | 4    | 4    | 3    | 4    |
| B25           | 2011 | Zhang, D. et al. & 23183314 | BSP2                | Chongqing           | 29.56    | 106.55    | 2   | 2   | 3   | 3    | 4    | 5    | 2    | 6    | 3    | 5    | 3    | 3   | 4    | 2    | 4   | 7     | 9    | 3    | 4   | 4    | 4    | 4    | 3    | 4    |
| B26           | 2011 | Zhang, D. et al. & 23183314 | BSP2                | Chongqing           | 29.56    | 106.55    | 2   | 3   | 2   | 3    | 4    | 5    | 2    | 5    | 3    | 4    | 2    | 3   | 4    | 2    | 4   | 2     | 8    | 3    | 4   | 3    | 4    | 4    | 3    | 3    |
| B27           | 2011 | Zhang, D. et al. & 23183314 | BSP2                | Chongqing           | 29.56    | 106.55    | 2   | 3   | 2   | 2    | 4    | 5    | 2    | 7    | 2    | 5    | 3    | 5   | 4    | 2    | 4   | 5     | 9    | 3    | 4   | 4    | 4    | 4    | 3    | 4    |
| B28           | 2011 | Zhang, D. et al. & 23183314 | BSP2                | Chongqing           | 29.56    | 106.55    | 2   | 3   | 2   | 3    | 3    | 5    | 2    | 4    | 3    | 3    | 3    | 3   | 4    | 2    | 4   | 3     | 6    | 3    | 4   | 3    | 4    | 4    | 3    | 4    |
| B29           | 2011 | Zhang, D. et al. & 23183314 | BSP2                | Chongqing           | 29.56    | 106.55    | 2   | 3   | 2   | 3    | 4    | 4    | 2    | 8    | 3    | 5    | 3    | 3   | 4    | 2    | 4   | 6     | 9    | 3    | 4   | 5    | 4    | 4    | 3    | 4    |
| B30           | 2011 | Zhang, D. et al. & 23183314 | BSP2                | Chongqing           | 29.56    | 106.55    | 2   | 3   | 2   | 3    | 4    | 5    | 2    | 5    | 3    | 3    | 3    | 5   | 4    | 2    | 4   | 5     | 9    | 3    | 4   | 4    | 4    | 4    | 3    | 4    |
| B31           | 2011 | Zhang, D. et al. & 23183314 | BSP2                | Chongqing           | 29.56    | 106.55    | 2   | 3   | 3   | 3    | 4    | 5    | 2    | 7    | 3    | 5    | 3    | 3   | 4    | 2    | 4   | 5     | 5    | 3    | 4   | 4    | 4    | 4    | 3    | 4    |
| B32           | 2011 | Zhang, D. et al. & 23183314 | BSP2                | Chongqing           | 29.56    | 106.55    | 2   | 3   | 3   | 3    | 4    | 5    | 2    | 7    | 3    | 5    | 3    | 3   | 4    | 2    | 2   | 7     | 7    | 5    | 4   | 4    | 4    | 4    | 3    | 2    |
| B33           | 2011 | Zhang, D. et al. & 23183314 | BSP2                | Chongqing           | 29.56    | 106.55    | 2   | 3   | 3   | 3    | 4    | 5    | 2    | 5    | 3    | 3    | 3    | 3   | 3    | 2    | 4   | 2     | 7    | 3    | 5   | 3    | 4    | 4    | 3    | 2    |
| B34           | 2011 | Zhang, D. et al. & 23183314 | BSP2                | Chongqing           | 29.56    | 106.55    | 2   | 3   | 1   | 3    | 4    | 5    | 2    | 8    | 3    | 5    | 3    | 3   | 2    | 2    | 4   | 6     | 9    | 3    | 4   | 4    | 4    | 4    | 3    | 4    |
| B35           | 2011 | Zhang, D. et al. & 23183314 | BSP2                | Chongqing           | 29.56    | 106.55    | 2   | 3   | 3   | 3    | 4    | 5    | 2    | 7    | 3    | 4    | 3    | 3   | 4    | 2    | 4   | 5     | 7    | 3    | 4   | 5    | 4    | 4    | 3    | 4    |
| B36           | 2011 | Zhang, D. et al. & 23183314 | BSP2                | Chongqing           | 29.56    | 106.55    | 2   | 3   | 3   | 3    | 3    | 5    | 2    | 5    | 3    | 4    | 3    | 5   | 4    | 2    | 4   | 5     | 9    | 3    | 4   | 3    | 4    | 4    | 3    | 4    |
| B37           | 2011 | Zhang, D. et al. & 23183314 | BSP2                | Chongqing           | 29.56    | 106.55    | 2   | 3   | 3   | 3    | 4    | 5    | 2    | 7    | 3    | 5    | 3    | 3   | 4    | 2    | 4   | 5     | 7    | 3    | 6   | 5    | 4    | 4    | 3    | 4    |
| B38           | 2011 | Zhang, D. et al. & 23183314 | BSP2                | Chongqing           | 29.56    | 106.55    | 2   | 3   | 3   | 3    | 4    | 5    | 2    | 7    | 3    | 6    | 3    | 3   | 4    | 2    | 3   | 4     | 7    | 5    | 4   | 4    | 4    | 4    | 3    | 4    |



|      |      |                                          |      |           |       |        |   |   |   |   |   |   |   |   |   |   |   |   |   |   |   |   |   |    |   |   |   |   |   |   |   |
|------|------|------------------------------------------|------|-----------|-------|--------|---|---|---|---|---|---|---|---|---|---|---|---|---|---|---|---|---|----|---|---|---|---|---|---|---|
| B80  | 2011 | Zhang, D.<br><i>et al.</i> &<br>23183314 | BSP2 | Chongqing | 29.56 | 106.55 | 2 | 3 | 3 | 3 | 3 | 4 | 5 | 2 | 7 | 3 | 4 | 3 | 3 | 4 | 2 | 4 | 1 | 9  | 3 | 4 | 5 | 4 | 4 | 3 | 4 |
| B81  | 2011 | Zhang, D.<br><i>et al.</i> &<br>23183314 | BSP2 | Chongqing | 29.56 | 106.55 | 2 | 3 | 3 | 3 | 3 | 4 | 5 | 2 | 7 | 3 | 5 | 3 | 3 | 2 | 2 | 4 | 6 | 8  | 5 | 4 | 4 | 4 | 4 | 3 | 5 |
| B82  | 2011 | Zhang, D.<br><i>et al.</i> &<br>23183314 | BSP2 | Chongqing | 29.56 | 106.55 | 2 | 3 | 3 | 3 | 3 | 4 | 5 | 2 | 5 | 3 | 4 | 2 | 3 | 4 | 1 | 4 | 3 | 6  | 3 | 4 | 3 | 4 | 4 | 3 | 4 |
| B83  | 2011 | Zhang, D.<br><i>et al.</i> &<br>23183314 | BSP2 | Chongqing | 29.56 | 106.55 | 2 | 3 | 2 | 3 | 3 | 4 | 5 | 2 | 5 | 3 | 3 | 2 | 3 | 4 | 1 | 2 | 3 | 6  | 3 | 4 | 3 | 4 | 4 | 2 | 4 |
| B84  | 2011 | Zhang, D.<br><i>et al.</i> &<br>23183314 | BSP2 | Chongqing | 29.56 | 106.55 | 2 | 3 | 3 | 3 | 3 | 4 | 5 | 2 | 7 | 3 | 4 | 3 | 3 | 4 | 2 | 4 | 7 | 9  | 4 | 4 | 4 | 4 | 4 | 3 | 5 |
| B85  | 2011 | Zhang, D.<br><i>et al.</i> &<br>23183314 | BSP2 | Chongqing | 29.56 | 106.55 | 2 | 3 | 3 | 3 | 3 | 4 | 5 | 2 | 5 | 4 | 3 | 3 | 3 | 4 | 2 | 4 | 3 | 9  | 3 | 4 | 3 | 4 | 2 | 3 | 4 |
| B86  | 2011 | Zhang, D.<br><i>et al.</i> &<br>23183314 | BSP2 | Chongqing | 29.56 | 106.55 | 2 | 3 | 3 | 3 | 3 | 4 | 5 | 2 | 7 | 3 | 5 | 3 | 3 | 4 | 2 | 4 | 5 | 9  | 5 | 4 | 4 | 4 | 4 | 3 | 4 |
| B87  | 2011 | Zhang, D.<br><i>et al.</i> &<br>23183314 | BSP2 | Chongqing | 29.56 | 106.55 | 2 | 3 | 3 | 3 | 3 | 4 | 5 | 2 | 7 | 1 | 5 | 3 | 3 | 4 | 2 | 4 | 6 | 7  | 5 | 4 | 4 | 4 | 4 | 3 | 4 |
| B88  | 2011 | Zhang, D.<br><i>et al.</i> &<br>23183314 | BSP2 | Chongqing | 29.56 | 106.55 | 2 | 3 | 3 | 3 | 3 | 4 | 5 | 2 | 7 | 3 | 5 | 3 | 3 | 4 | 2 | 4 | 6 | 7  | 3 | 4 | 4 | 4 | 4 | 3 | 4 |
| B89  | 2011 | Zhang, D.<br><i>et al.</i> &<br>23183314 | BSP2 | Chongqing | 29.56 | 106.55 | 2 | 3 | 3 | 3 | 3 | 4 | 5 | 2 | 7 | 3 | 5 | 3 | 3 | 4 | 2 | 4 | 4 | 7  | 3 | 4 | 4 | 4 | 4 | 3 | 4 |
| B90  | 2011 | Zhang, D.<br><i>et al.</i> &<br>23183314 | BSP2 | Chongqing | 29.56 | 106.55 | 2 | 3 | 3 | 3 | 3 | 4 | 5 | 2 | 7 | 3 | 4 | 3 | 3 | 1 | 2 | 4 | 4 | 9  | 3 | 4 | 5 | 4 | 4 | 3 | 4 |
| B91  | 2011 | Zhang, D.<br><i>et al.</i> &<br>23183314 | BSP2 | Chongqing | 29.56 | 106.55 | 2 | 3 | 3 | 2 | 4 | 5 | 2 | 7 | 3 | 5 | 3 | 3 | 4 | 2 | 4 | 4 | 9 | 3  | 4 | 4 | 4 | 4 | 3 | 4 |   |
| B92  | 2011 | Zhang, D.<br><i>et al.</i> &<br>23183314 | BSP2 | Chongqing | 29.56 | 106.55 | 2 | 3 | 3 | 3 | 3 | 4 | 5 | 2 | 7 | 3 | 5 | 3 | 3 | 4 | 2 | 4 | 6 | 9  | 3 | 4 | 5 | 4 | 4 | 3 | 4 |
| B93  | 2011 | Zhang, D.<br><i>et al.</i> &<br>23183314 | BSP2 | Chongqing | 29.56 | 106.55 | 2 | 3 | 3 | 3 | 3 | 4 | 5 | 2 | 5 | 3 | 3 | 3 | 3 | 4 | 1 | 4 | 3 | 6  | 3 | 4 | 4 | 4 | 4 | 3 | 4 |
| B94  | 2011 | Zhang, D.<br><i>et al.</i> &<br>23183314 | BSP1 | Chongqing | 29.56 | 106.55 | 2 | 5 | 2 | 1 | 4 | 5 | 2 | 5 | 2 | 3 | 2 | 2 | 3 | 2 | 4 | 4 | 6 | 3  | 3 | 1 | 4 | 2 | 3 | 2 |   |
| B95  | 2011 | Zhang, D.<br><i>et al.</i> &<br>23183314 | BSP2 | Chongqing | 29.56 | 106.55 | 2 | 3 | 3 | 3 | 3 | 4 | 5 | 2 | 6 | 3 | 5 | 3 | 3 | 4 | 2 | 4 | 5 | 9  | 3 | 4 | 4 | 4 | 4 | 3 | 4 |
| B96  | 2011 | Zhang, D.<br><i>et al.</i> &<br>23183314 | BSP2 | Chongqing | 29.56 | 106.55 | 2 | 3 | 3 | 4 | 4 | 5 | 2 | 7 | 3 | 5 | 3 | 4 | 4 | 2 | 4 | 6 | 6 | 5  | 4 | 4 | 4 | 4 | 3 | 4 |   |
| B97  | 2011 | Zhang, D.<br><i>et al.</i> &<br>23183314 | BSP2 | Chongqing | 29.56 | 106.55 | 2 | 3 | 3 | 3 | 3 | 4 | 5 | 2 | 4 | 3 | 3 | 3 | 3 | 4 | 1 | 4 | 4 | 6  | 3 | 4 | 3 | 4 | 2 | 3 | 4 |
| B98  | 2011 | Zhang, D.<br><i>et al.</i> &<br>23183314 | BSP2 | Chongqing | 29.56 | 106.55 | 2 | 3 | 3 | 3 | 3 | 4 | 5 | 2 | 7 | 3 | 5 | 3 | 3 | 4 | 2 | 4 | 3 | 8  | 4 | 4 | 6 | 4 | 4 | 3 | 4 |
| B99  | 2011 | Zhang, D.<br><i>et al.</i> &<br>23183314 | BSP2 | Chongqing | 29.56 | 106.55 | 2 | 3 | 3 | 3 | 3 | 4 | 5 | 2 | 5 | 3 | 3 | 3 | 3 | 4 | 1 | 4 | 3 | 6  | 3 | 4 | 3 | 4 | 4 | 3 | 4 |
| B100 | 2011 | Zhang, D.<br><i>et al.</i> &<br>23183314 | BSP2 | Chongqing | 29.56 | 106.55 | 2 | 3 | 3 | 3 | 3 | 4 | 5 | 2 | 7 | 3 | 5 | 3 | 3 | 4 | 2 | 4 | 4 | 7  | 3 | 4 | 4 | 4 | 4 | 3 | 4 |
| B101 | 2011 | Zhang, D.<br><i>et al.</i> &<br>23183314 | BSP2 | Chongqing | 29.56 | 106.55 | 2 | 3 | 3 | 3 | 3 | 4 | 5 | 2 | 7 | 3 | 5 | 3 | 3 | 4 | 2 | 4 | 4 | 7  | 3 | 4 | 4 | 4 | 4 | 3 | 4 |
| B102 | 2011 | Zhang, D.<br><i>et al.</i> &<br>23183314 | BSP2 | Chongqing | 29.56 | 106.55 | 2 | 3 | 3 | 3 | 3 | 4 | 5 | 2 | 7 | 3 | 5 | 3 | 3 | 4 | 2 | 4 | 6 | 8  | 3 | 4 | 4 | 4 | 4 | 3 | 5 |
| B103 | 2011 | Zhang, D.<br><i>et al.</i> &<br>23183314 | BSP2 | Chongqing | 29.56 | 106.55 | 2 | 3 | 3 | 3 | 3 | 4 | 5 | 2 | 7 | 3 | 2 | 3 | 3 | 4 | 2 | 4 | 4 | 9  | 4 | 5 | 4 | 4 | 4 | 3 | 4 |
| B104 | 2011 | Zhang, D.<br><i>et al.</i> &<br>23183314 | BSP2 | Chongqing | 29.56 | 106.55 | 2 | 3 | 3 | 3 | 3 | 4 | 5 | 2 | 7 | 3 | 5 | 3 | 3 | 4 | 2 | 4 | 6 | 6  | 3 | 4 | 4 | 4 | 4 | 3 | 4 |
| B105 | 2011 | Zhang, D.<br><i>et al.</i> &<br>23183314 | BSP2 | Chongqing | 29.56 | 106.55 | 2 | 3 | 3 | 3 | 3 | 4 | 5 | 2 | 7 | 3 | 5 | 3 | 3 | 4 | 2 | 4 | 6 | 9  | 3 | 4 | 4 | 4 | 4 | 3 | 4 |
| B106 | 2011 | Zhang, D.<br><i>et al.</i> &<br>23183314 | BSP2 | Chongqing | 29.56 | 106.55 | 2 | 3 | 3 | 3 | 3 | 4 | 5 | 2 | 5 | 3 | 3 | 2 | 3 | 4 | 1 | 2 | 3 | 6  | 3 | 3 | 3 | 4 | 4 | 3 | 4 |
| B107 | 2011 | Zhang, D.<br><i>et al.</i> &<br>23183314 | BSP2 | Chongqing | 29.56 | 106.55 | 2 | 3 | 2 | 3 | 3 | 4 | 6 | 2 | 7 | 3 | 3 | 2 | 2 | 4 | 2 | 4 | 4 | 9  | 4 | 4 | 4 | 4 | 4 | 3 | 3 |
| B108 | 2011 | Zhang, D.<br><i>et al.</i> &<br>23183314 | BSP2 | Chongqing | 29.56 | 106.55 | 2 | 3 | 3 | 3 | 3 | 4 | 5 | 2 | 7 | 3 | 5 | 3 | 3 | 4 | 2 | 4 | 6 | 9  | 3 | 4 | 5 | 4 | 4 | 3 | 4 |
| B109 | 2011 | Zhang, D.<br><i>et al.</i> &<br>23183314 | BSP2 | Chongqing | 29.56 | 106.55 | 2 | 3 | 3 | 3 | 3 | 4 | 5 | 2 | 5 | 3 | 5 | 3 | 3 | 4 | 2 | 4 | 6 | 7  | 4 | 5 | 4 | 4 | 4 | 3 | 4 |
| B110 | 2011 | Zhang, D.<br><i>et al.</i> &<br>23183314 | BSP2 | Chongqing | 29.56 | 106.55 | 2 | 3 | 2 | 3 | 3 | 4 | 6 | 2 | 7 | 3 | 5 | 3 | 3 | 4 | 2 | 4 | 4 | 9  | 3 | 4 | 5 | 4 | 4 | 3 | 4 |
| B111 | 2011 | Zhang, D.<br><i>et al.</i> &<br>23183314 | BSP2 | Chongqing | 29.56 | 106.55 | 2 | 3 | 3 | 2 | 4 | 5 | 2 | 7 | 3 | 5 | 3 | 3 | 4 | 2 | 4 | 7 | 9 | 5  | 4 | 4 | 4 | 4 | 3 | 4 |   |
| B112 | 2011 | Zhang, D.<br><i>et al.</i> &<br>23183314 | BSP2 | Chongqing | 29.56 | 106.55 | 2 | 3 | 3 | 3 | 3 | 4 | 5 | 2 | 7 | 3 | 5 | 3 | 3 | 4 | 2 | 4 | 6 | 7  | 3 | 4 | 4 | 4 | 4 | 3 | 5 |
| B113 | 2011 | Zhang, D.<br><i>et al.</i> &<br>23183314 | BSP2 | Chongqing | 29.56 | 106.55 | 2 | 3 | 2 | 3 | 3 | 4 | 5 | 2 | 4 | 3 | 3 | 3 | 3 | 4 | 1 | 4 | 4 | 9  | 3 | 4 | 3 | 4 | 2 | 3 | 4 |
| B114 | 2011 | Zhang, D.<br><i>et al.</i> &<br>23183314 | BSP2 | Chongqing | 29.56 | 106.55 | 2 | 3 | 3 | 2 | 4 | 5 | 2 | 7 | 3 | 5 | 3 | 3 | 4 | 2 | 4 | 5 | 9 | 3  | 4 | 4 | 4 | 4 | 4 | 3 | 4 |
| B115 | 2011 | Zhang, D.<br><i>et al.</i> &<br>23183314 | BSP2 | Chongqing | 29.56 | 106.55 | 2 | 3 | 1 | 3 | 3 | 4 | 5 | 2 | 5 | 3 | 5 | 3 | 3 | 4 | 2 | 4 | 6 | 9  | 3 | 4 | 4 | 4 | 4 | 3 | 4 |
| B116 | 2011 | Zhang, D.<br><i>et al.</i> &<br>23183314 | BSP2 | Chongqing | 29.56 | 106.55 | 2 | 3 | 2 | 2 | 4 | 5 | 2 | 5 | 3 | 3 | 2 | 3 | 4 | 1 | 4 | 3 | 5 | 3  | 4 | 3 | 4 | 4 | 3 | 4 |   |
| B117 | 2011 | Zhang, D.<br><i>et al.</i> &<br>23183314 | BSP2 | Chongqing | 29.56 | 106.55 | 2 | 3 | 3 | 3 | 3 | 4 | 4 | 2 | 5 | 3 | 3 | 4 | 1 | 4 | 2 | 4 | 5 | 9  | 4 | 5 | 4 | 4 | 4 | 3 | 4 |
| B118 | 2011 | Zhang, D.<br><i>et al.</i> &<br>23183314 | BSP2 | Chongqing | 29.56 | 106.55 | 2 | 3 | 3 | 3 | 3 | 4 | 5 | 2 | 7 | 3 | 5 | 3 | 3 | 4 | 2 | 4 | 6 | ND | 3 | 6 | 4 | 4 | 4 | 3 | 4 |
| B119 | 2011 | Zhang, D.<br><i>et al.</i> &<br>23183314 | BSP2 | Chongqing | 29.56 | 106.55 | 2 | 3 | 1 | 3 | 3 | 4 | 5 | 2 | 6 | 3 | 5 | 3 | 3 | 4 | 2 | 4 | 6 | 9  | 5 | 6 | 4 | 4 | 4 | 3 | 4 |
| B120 | 2011 | Zhang, D.<br><i>et al.</i> &<br>23183314 | BSP2 | Chongqing | 29.56 | 106.55 | 2 | 3 | 3 | 3 | 3 | 4 | 5 | 2 | 7 | 3 | 5 | 3 | 3 | 4 | 2 | 4 | 6 | ND | 3 | 6 | 4 | 4 | 4 | 3 | 4 |

|      |      |                                          |        |           |       |        |   |   |   |   |   |   |   |   |   |   |   |   |   |   |   |   |    |   |   |   |   |   |   |   |
|------|------|------------------------------------------|--------|-----------|-------|--------|---|---|---|---|---|---|---|---|---|---|---|---|---|---|---|---|----|---|---|---|---|---|---|---|
| B121 | 2011 | Zhang, D.<br><i>et al.</i> &<br>23183314 | BSP2   | Chongqing | 29.56 | 106.55 | 2 | 3 | 3 | 3 | 4 | 5 | 2 | 7 | 3 | 5 | 3 | 3 | 4 | 2 | 4 | 6 | ND | 3 | 6 | 4 | 4 | 4 | 3 | 4 |
| B122 | 2011 | Zhang, D.<br><i>et al.</i> &<br>23183314 | BSP2   | Chongqing | 29.56 | 106.55 | 1 | 3 | 3 | 3 | 4 | 5 | 2 | 7 | 3 | 5 | 3 | 3 | 4 | 2 | 4 | 6 | ND | 3 | 6 | 4 | 4 | 4 | 3 | 4 |
| B123 | 2011 | Zhang, D.<br><i>et al.</i> &<br>23183314 | BSP2   | Chongqing | 29.56 | 106.55 | 2 | 3 | 2 | 3 | 4 | 5 | 2 | 4 | 3 | 3 | 3 | 3 | 4 | 1 | 3 | 2 | 7  | 3 | 4 | 3 | 4 | 4 | 3 | 3 |
| B124 | 2011 | Zhang, D.<br><i>et al.</i> &<br>23183314 | BSP2   | Chongqing | 29.56 | 106.55 | 2 | 3 | 2 | 3 | 4 | 5 | 2 | 5 | 3 | 4 | 2 | 3 | 4 | 1 | 2 | 3 | 5  | 3 | 4 | 3 | 4 | 4 | 3 | 4 |
| B125 | 2011 | Zhang, D.<br><i>et al.</i> &<br>23183314 | BSP2   | Chongqing | 29.56 | 106.55 | 2 | 3 | 3 | 3 | 4 | 5 | 2 | 6 | 3 | 6 | 3 | 3 | 4 | 2 | 4 | 6 | 9  | 4 | 4 | 4 | 4 | 4 | 3 | 4 |
| B126 | 2011 | Zhang, D.<br><i>et al.</i> &<br>23183314 | BSP2   | Chongqing | 29.56 | 106.55 | 2 | 3 | 3 | 2 | 4 | 5 | 2 | 7 | 3 | 5 | 3 | 3 | 4 | 2 | 4 | 5 | 9  | 3 | 5 | 5 | 4 | 4 | 2 | 4 |
| B127 | 2011 | Zhang, D.<br><i>et al.</i> &<br>23183314 | BSP2   | Chongqing | 29.56 | 106.55 | 2 | 3 | 3 | 3 | 4 | 5 | 2 | 7 | 3 | 5 | 3 | 3 | 4 | 2 | 4 | 6 | ND | 3 | 6 | 4 | 4 | 4 | 3 | 4 |
| B128 | 2011 | Zhang, D.<br><i>et al.</i> &<br>23183314 | BSP2   | Chongqing | 29.56 | 106.55 | 2 | 3 | 3 | 4 | 4 | 5 | 2 | 7 | 3 | 5 | 3 | 3 | 4 | 2 | 4 | 7 | 8  | 5 | 5 | 4 | 4 | 4 | 3 | 4 |
| B129 | 2011 | Zhang, D.<br><i>et al.</i> &<br>23183314 | BSP2   | Chongqing | 29.56 | 106.55 | 2 | 3 | 3 | 3 | 4 | 5 | 2 | 7 | 2 | 5 | 3 | 3 | 4 | 2 | 4 | 6 | 8  | 3 | 5 | 4 | 4 | 4 | 3 | 4 |
| B130 | 2011 | Zhang, D.<br><i>et al.</i> &<br>23183314 | BSP2   | Chongqing | 29.56 | 106.55 | 2 | 3 | 3 | 3 | 4 | 5 | 2 | 4 | 3 | 4 | 3 | 3 | 4 | 1 | 2 | 3 | 5  | 3 | 4 | 4 | 4 | 4 | 3 | 4 |
| B131 | 2011 | Zhang, D.<br><i>et al.</i> &<br>23183314 | BSP2   | Chongqing | 29.56 | 106.55 | 2 | 3 | 3 | 3 | 4 | 5 | 2 | 7 | 3 | 5 | 3 | 3 | 4 | 2 | 4 | 4 | 7  | 3 | 4 | 4 | 4 | 4 | 3 | 4 |
| B132 | 2011 | Zhang, D.<br><i>et al.</i> &<br>23183314 | BSP2   | Chongqing | 29.56 | 106.55 | 2 | 1 | 3 | 3 | 4 | 5 | 2 | 7 | 3 | 5 | 3 | 3 | 4 | 2 | 4 | 4 | 9  | 3 | 5 | 3 | 4 | 4 | 3 | 4 |
| B133 | 2011 | Zhang, D.<br><i>et al.</i> &<br>23183314 | BSP2   | Chongqing | 29.56 | 106.55 | 2 | 3 | 3 | 3 | 4 | 5 | 2 | 5 | 3 | 3 | 3 | 3 | 4 | 2 | 4 | 2 | 8  | 3 | 4 | 3 | 4 | 4 | 3 | 4 |
| B134 | 2011 | Zhang, D.<br><i>et al.</i> &<br>23183314 | BSP2   | Chongqing | 29.56 | 106.55 | 2 | 3 | 3 | 3 | 4 | 5 | 2 | 7 | 3 | 5 | 3 | 3 | 4 | 2 | 4 | 6 | 9  | 3 | 5 | 5 | 4 | 4 | 2 | 4 |
| B135 | 2011 | Zhang, D.<br><i>et al.</i> &<br>23183314 | BSP2   | Chongqing | 29.56 | 106.55 | 2 | 3 | 3 | 3 | 4 | 5 | 2 | 7 | 2 | 5 | 3 | 3 | 2 | 2 | 4 | 6 | 9  | 3 | 6 | 4 | 4 | 4 | 3 | 4 |
| B136 | 2011 | Zhang, D.<br><i>et al.</i> &<br>23183314 | BSP2   | Chongqing | 29.56 | 106.55 | 2 | 3 | 3 | 3 | 4 | 5 | 2 | 7 | 3 | 5 | 3 | 3 | 4 | 2 | 4 | 5 | 9  | 3 | 6 | 5 | 4 | 4 | 3 | 4 |
| B137 | 2011 | Zhang, D.<br><i>et al.</i> &<br>23183314 | BSP2   | Chongqing | 29.56 | 106.55 | 2 | 2 | 3 | 3 | 4 | 5 | 2 | 7 | 3 | 5 | 3 | 3 | 4 | 2 | 4 | 5 | 8  | 5 | 6 | 4 | 4 | 4 | 3 | 4 |
| B138 | 2011 | Zhang, D.<br><i>et al.</i> &<br>23183314 | BSP2   | Chongqing | 29.56 | 106.55 | 2 | 3 | 2 | 3 | 4 | 5 | 2 | 4 | 3 | 3 | 3 | 3 | 4 | 2 | 4 | 4 | 9  | 3 | 4 | 4 | 4 | 2 | 3 | 4 |
| B139 | 2011 | Zhang, D.<br><i>et al.</i> &<br>23183314 | BSP2   | Chongqing | 29.56 | 106.55 | 2 | 3 | 3 | 3 | 4 | 5 | 2 | 5 | 3 | 3 | 3 | 3 | 4 | 2 | 4 | 4 | 9  | 3 | 4 | 4 | 2 | 4 | 3 | 4 |
| B140 | 2011 | Zhang, D.<br><i>et al.</i> &<br>23183314 | BSP2   | Chongqing | 29.56 | 106.55 | 2 | 3 | 3 | 3 | 4 | 5 | 2 | 5 | 3 | 5 | 3 | 3 | 4 | 2 | 4 | 6 | ND | 3 | 4 | 4 | 4 | 4 | 3 | 4 |
| B141 | 2011 | Zhang, D.<br><i>et al.</i> &<br>23183314 | BSP2   | Chongqing | 29.56 | 106.55 | 2 | 3 | 3 | 3 | 4 | 5 | 2 | 7 | 3 | 5 | 3 | 3 | 4 | 2 | 4 | 6 | 9  | 3 | 4 | 5 | 4 | 4 | 3 | 4 |
| B142 | 2011 | Zhang, D.<br><i>et al.</i> &<br>23183314 | BSP2   | Chongqing | 29.56 | 106.55 | 2 | 3 | 3 | 3 | 4 | 5 | 2 | 5 | 3 | 5 | 4 | 3 | 4 | 2 | 3 | 6 | 6  | 3 | 4 | 4 | 4 | 2 | 3 | 4 |
| B143 | 2011 | Zhang, D.<br><i>et al.</i> &<br>23183314 | BSP2   | Chongqing | 29.56 | 106.55 | 2 | 4 | 3 | 3 | 4 | 5 | 2 | 5 | 2 | 3 | 3 | 1 | 2 | 1 | 4 | 3 | ND | 3 | 4 | 4 | 4 | 2 | 3 | 4 |
| B144 | 2011 | Zhang, D.<br><i>et al.</i> &<br>23183314 | BSP2   | Chongqing | 29.56 | 106.55 | 2 | 3 | 3 | 3 | 4 | 5 | 2 | 7 | 3 | 5 | 3 | 3 | 4 | 2 | 4 | 6 | 4  | 3 | 4 | 4 | 4 | 4 | 3 | 4 |
| B145 | 2011 | Zhang, D.<br><i>et al.</i> &<br>23183314 | BSP2   | Chongqing | 29.56 | 106.55 | 2 | 3 | 3 | 3 | 4 | 5 | 2 | 7 | 3 | 5 | 3 | 3 | 4 | 2 | 4 | 7 | 9  | 5 | 6 | 4 | 4 | 4 | 3 | 5 |
| B146 | 2011 | Zhang, D.<br><i>et al.</i> &<br>23183314 | BSP2   | Chongqing | 29.56 | 106.55 | 2 | 4 | 2 | 3 | 4 | 5 | 2 | 5 | 3 | 3 | 3 | 3 | 1 | 2 | 4 | 4 | 9  | 3 | 4 | 4 | 4 | 4 | 2 | 4 |
| B147 | 2011 | Zhang, D.<br><i>et al.</i> &<br>23183314 | BSP2   | Chongqing | 29.56 | 106.55 | 2 | 3 | 3 | 3 | 4 | 5 | 2 | 7 | 3 | 5 | 3 | 3 | 4 | 2 | 4 | 6 | 9  | 5 | 6 | 4 | 4 | 4 | 3 | 4 |
| B148 | 2011 | Zhang, D.<br><i>et al.</i> &<br>23183314 | BSP2   | Chongqing | 29.56 | 106.55 | 2 | 3 | 3 | 3 | 4 | 5 | 2 | 7 | 3 | 3 | 3 | 3 | 4 | 2 | 4 | 5 | 9  | 3 | 6 | 5 | 4 | 4 | 3 | 4 |
| B149 | 2011 | Zhang, D.<br><i>et al.</i> &<br>23183314 | BSP2   | Chongqing | 29.56 | 106.55 | 2 | 3 | 3 | 3 | 4 | 5 | 2 | 7 | 3 | 5 | 3 | 3 | 4 | 2 | 4 | 6 | 9  | 5 | 6 | 4 | 4 | 4 | 3 | 4 |
| B150 | 2011 | Zhang, D.<br><i>et al.</i> &<br>23183314 | BSP2   | Chongqing | 29.56 | 106.55 | 2 | 3 | 3 | 3 | 4 | 5 | 2 | 7 | 3 | 5 | 3 | 3 | 4 | 2 | 4 | 6 | 9  | 5 | 6 | 4 | 4 | 4 | 3 | 4 |
| B151 | 2011 | Zhang, D.<br><i>et al.</i> &<br>23183314 | BSP2   | Chongqing | 29.56 | 106.55 | 2 | 3 | 3 | 3 | 4 | 5 | 2 | 7 | 3 | 5 | 3 | 3 | 4 | 2 | 4 | 6 | ND | 3 | 6 | 4 | 4 | 4 | 3 | 4 |
| B152 | 2011 | Zhang, D.<br><i>et al.</i> &<br>23183314 | BSP2   | Chongqing | 29.56 | 106.55 | 2 | 3 | 3 | 3 | 4 | 5 | 2 | 7 | 3 | 5 | 3 | 3 | 4 | 2 | 4 | 6 | ND | 3 | 6 | 4 | 4 | 4 | 3 | 4 |
| B153 | 2011 | Zhang, D.<br><i>et al.</i> &<br>23183314 | BSP2   | Chongqing | 29.56 | 106.55 | 2 | 3 | 3 | 3 | 4 | 5 | 2 | 7 | 3 | 5 | 3 | 3 | 4 | 2 | 4 | 5 | 9  | 3 | 6 | 5 | 4 | 4 | 3 | 4 |
| B154 | 2011 | Zhang, D.<br><i>et al.</i> &<br>23183314 | BSP2   | Chongqing | 29.56 | 106.55 | 2 | 3 | 3 | 3 | 4 | 5 | 2 | 7 | 3 | 5 | 3 | 3 | 4 | 2 | 4 | 6 | 9  | 3 | 4 | 5 | 4 | 4 | 3 | 4 |
| B155 | 2011 | Zhang, D.<br><i>et al.</i> &<br>23183314 | BSP2   | Chongqing | 29.56 | 106.55 | 2 | 3 | 3 | 3 | 4 | 5 | 2 | 7 | 3 | 5 | 3 | 3 | 4 | 2 | 4 | 5 | 9  | 3 | 6 | 5 | 4 | 4 | 3 | 4 |
| B156 | 2011 | Zhang, D.<br><i>et al.</i> &<br>23183314 | BSPint | Chongqing | 29.56 | 106.55 | 2 | 4 | 2 | 3 | 4 | 5 | 2 | 4 | 2 | 2 | 3 | 2 | 3 | 2 | 4 | 1 | 6  | 3 | 4 | 1 | 4 | 2 | 3 | 2 |
| B157 | 2011 | Zhang, D.<br><i>et al.</i> &<br>23183314 | BSP2   | Chongqing | 29.56 | 106.55 | 2 | 3 | 3 | 3 | 4 | 5 | 2 | 7 | 3 | 5 | 3 | 3 | 4 | 2 | 4 | 4 | 9  | 3 | 6 | 4 | 4 | 4 | 3 | 4 |
| B158 | 2011 | Zhang, D.<br><i>et al.</i> &<br>23183314 | BSP2   | Chongqing | 29.56 | 106.55 | 2 | 3 | 3 | 3 | 4 | 5 | 2 | 7 | 3 | 5 | 3 | 3 | 4 | 2 | 4 | 5 | 9  | 3 | 6 | 5 | 4 | 4 | 3 | 4 |
| B159 | 2011 | Zhang, D.<br><i>et al.</i> &<br>23183314 | BSP2   | Chongqing | 29.56 | 106.55 | 2 | 3 | 2 | 3 | 4 | 5 | 2 | 5 | 3 | 3 | 3 | 4 | 4 | 2 | 4 | 3 | 6  | 3 | 4 | 3 | 4 | 4 | 3 | 4 |
| B160 | 2011 | Zhang, D.<br><i>et al.</i> &<br>23183314 | BSP2   | Chongqing | 29.56 | 106.55 | 2 | 3 | 3 | 3 | 4 | 2 | 2 | 7 | 3 | 5 | 3 | 3 | 4 | 2 | 4 | 4 | 9  | 3 | 6 | 4 | 4 | 4 | 3 | 4 |
| B161 | 2011 | Zhang, D.<br><i>et al.</i> &<br>23183314 | BSP2   | Chongqing | 29.56 | 106.55 | 2 | 3 | 3 | 3 | 4 | 2 | 2 | 7 | 3 | 5 | 3 | 3 | 4 | 2 | 4 | 4 | 9  | 3 | 6 | 4 | 4 | 4 | 3 | 4 |



|      |           |                                          |        |           |       |        |   |   |   |   |   |   |   |   |   |   |   |   |   |   |   |   |    |   |   |   |   |   |   |   |
|------|-----------|------------------------------------------|--------|-----------|-------|--------|---|---|---|---|---|---|---|---|---|---|---|---|---|---|---|---|----|---|---|---|---|---|---|---|
| B162 | 2011      | Zhang, D.<br><i>et al.</i> &<br>23183314 | BSP2   | Chongqing | 29.56 | 106.55 | 2 | 3 | 3 | 3 | 4 | 5 | 2 | 5 | 3 | 3 | 3 | 3 | 4 | 2 | 4 | 4 | ND | 3 | 4 | 4 | 4 | 2 | 3 | 4 |
| B163 | 2011      | Zhang, D.<br><i>et al.</i> &<br>23183314 | BSP2   | Chongqing | 29.56 | 106.55 | 2 | 3 | 3 | 3 | 3 | 5 | 2 | 5 | 3 | 3 | 2 | 3 | 4 | 1 | 4 | 2 | 8  | 3 | 4 | 3 | 4 | 4 | 3 | 4 |
| B164 | 2011      | Zhang, D.<br><i>et al.</i> &<br>23183314 | BSP2   | Chongqing | 29.56 | 106.55 | 2 | 5 | 3 | 3 | 4 | 5 | 2 | 5 | 2 | 3 | 3 | 2 | 3 | 2 | 4 | 6 | 5  | 3 | 4 | 1 | 4 | 2 | 2 | 2 |
| B165 | 2011      | Zhang, D.<br><i>et al.</i> &<br>23183314 | BSP2   | Chongqing | 29.56 | 106.55 | 2 | 3 | 3 | 3 | 4 | 5 | 2 | 7 | 3 | 5 | 3 | 3 | 4 | 2 | 4 | 6 | 9  | 5 | 4 | 4 | 4 | 4 | 3 | 4 |
| B166 | 2011      | Zhang, D.<br><i>et al.</i> &<br>23183314 | BSP2   | Chongqing | 29.56 | 106.55 | 2 | 3 | 3 | 3 | 4 | 5 | 2 | 5 | 3 | 3 | 3 | 3 | 4 | 2 | 4 | 4 | 9  | 3 | 4 | 3 | 4 | 4 | 2 | 4 |
| B167 | 2011      | Zhang, D.<br><i>et al.</i> &<br>23183314 | BSP2   | Chongqing | 29.56 | 106.55 | 2 | 3 | 2 | 3 | 4 | 5 | 2 | 7 | 3 | 5 | 4 | 4 | 4 | 2 | 4 | 6 | 9  | 3 | 6 | 4 | 4 | 4 | 3 | 4 |
| B168 | 2011      | Zhang, D.<br><i>et al.</i> &<br>23183314 | BSP2   | Chongqing | 29.56 | 106.55 | 2 | 3 | 3 | 3 | 4 | 5 | 2 | 7 | 3 | 5 | 3 | 3 | 4 | 2 | 4 | 6 | ND | 3 | 6 | 4 | 4 | 4 | 3 | 4 |
| B169 | 2011      | Zhang, D.<br><i>et al.</i> &<br>23183314 | BSP2   | Chongqing | 29.56 | 106.55 | 2 | 3 | 3 | 3 | 4 | 5 | 2 | 7 | 3 | 5 | 4 | 3 | 4 | 2 | 4 | 7 | 9  | 5 | 6 | 4 | 4 | 4 | 3 | 4 |
| B170 | 2011      | Zhang, D.<br><i>et al.</i> &<br>23183314 | BSP2   | Chongqing | 29.56 | 106.55 | 2 | 3 | 3 | 3 | 3 | 6 | 2 | 4 | 3 | 3 | 2 | 1 | 4 | 1 | 4 | 3 | 8  | 3 | 4 | 2 | 4 | 2 | 3 | 3 |
| B171 | 2011      | Zhang, D.<br><i>et al.</i> &<br>23183314 | BSP2   | Chongqing | 29.56 | 106.55 | 2 | 3 | 2 | 3 | 4 | 5 | 2 | 7 | 3 | 4 | 3 | 1 | 4 | 2 | 4 | 6 | 9  | 3 | 4 | 5 | 4 | 4 | 3 | 4 |
| B172 | 2011      | Zhang, D.<br><i>et al.</i> &<br>23183314 | BSP2   | Chongqing | 29.56 | 106.55 | 2 | 3 | 3 | 3 | 4 | 5 | 2 | 7 | 3 | 5 | 3 | 3 | 4 | 2 | 4 | 6 | 9  | 3 | 4 | 5 | 4 | 4 | 3 | 4 |
| B173 | 2011      | Zhang, D.<br><i>et al.</i> &<br>23183314 | BSP2   | Chongqing | 29.56 | 106.55 | 2 | 3 | 2 | 3 | 4 | 5 | 2 | 5 | 3 | 3 | 1 | 2 | 3 | 2 | 4 | 3 | ND | 3 | 4 | 2 | 4 | 2 | 3 | 4 |
| B174 | 2011      | Zhang, D.<br><i>et al.</i> &<br>23183314 | BSP2   | Chongqing | 29.56 | 106.55 | 2 | 3 | 3 | 3 | 4 | 5 | 2 | 7 | 3 | 5 | 3 | 3 | 4 | 2 | 4 | 2 | 8  | 5 | 6 | 4 | 4 | 4 | 3 | 4 |
| B175 | 2011      | Zhang, D.<br><i>et al.</i> &<br>23183314 | BSP2   | Chongqing | 29.56 | 106.55 | 2 | 3 | 3 | 2 | 4 | 5 | 2 | 7 | 3 | 5 | 1 | 3 | 4 | 2 | 4 | 5 | 9  | 3 | 6 | 5 | 4 | 4 | 3 | 4 |
| B176 | 2011      | Zhang, D.<br><i>et al.</i> &<br>23183314 | BSP2   | Chongqing | 29.56 | 106.55 | 2 | 3 | 3 | 3 | 3 | 5 | 2 | 3 | 3 | 3 | 3 | 3 | 4 | 2 | 4 | 5 | 8  | 3 | 4 | 3 | 4 | 4 | 3 | 4 |
| B177 | 2011      | Zhang, D.<br><i>et al.</i> &<br>23183314 | BSP2   | Chongqing | 29.56 | 106.55 | 2 | 3 | 3 | 2 | 4 | 5 | 2 | 7 | 3 | 5 | 3 | 3 | 4 | 2 | 4 | 5 | 4  | 3 | 4 | 4 | 4 | 4 | 3 | 3 |
| B178 | 2011      | Zhang, D.<br><i>et al.</i> &<br>23183314 | BSP2   | Chongqing | 29.56 | 106.55 | 2 | 3 | 3 | 3 | 4 | 5 | 2 | 7 | 3 | 5 | 3 | 3 | 4 | 2 | 4 | 6 | 9  | 3 | 4 | 5 | 4 | 4 | 3 | 4 |
| B179 | 2011      | Zhang, D.<br><i>et al.</i> &<br>23183314 | BSP2   | Chongqing | 29.56 | 106.55 | 2 | 3 | 3 | 3 | 4 | 5 | 2 | 7 | 3 | 5 | 3 | 3 | 4 | 2 | 4 | 6 | 9  | 3 | 4 | 5 | 4 | 4 | 3 | 4 |
| B180 | 2011      | Zhang, D.<br><i>et al.</i> &<br>23183314 | BSP2   | Chongqing | 29.56 | 106.55 | 2 | 3 | 3 | 3 | 4 | 5 | 2 | 7 | 3 | 5 | 3 | 3 | 3 | 2 | 4 | 6 | 9  | 5 | 6 | 4 | 4 | 4 | 2 | 4 |
| B181 | 2011      | Zhang, D.<br><i>et al.</i> &<br>23183314 | BSP2   | Chongqing | 29.56 | 106.55 | 2 | 3 | 3 | 3 | 4 | 5 | 2 | 7 | 3 | 5 | 3 | 3 | 4 | 2 | 4 | 6 | ND | 3 | 6 | 4 | 4 | 4 | 3 | 4 |
| B182 | 2011      | Zhang, D.<br><i>et al.</i> &<br>23183314 | BSP2   | Chongqing | 29.56 | 106.55 | 2 | 3 | 3 | 3 | 4 | 5 | 2 | 3 | 3 | 5 | 3 | 1 | 4 | 2 | 2 | 6 | 9  | 5 | 4 | 4 | 4 | 4 | 2 | 4 |
| B183 | 2011      | Zhang, D.<br><i>et al.</i> &<br>23183314 | BSP2   | Chongqing | 29.56 | 106.55 | 2 | 3 | 3 | 3 | 4 | 5 | 2 | 7 | 3 | 5 | 3 | 4 | 4 | 2 | 4 | 6 | 8  | 5 | 4 | 4 | 4 | 4 | 3 | 4 |
| B184 | 2011      | Zhang, D.<br><i>et al.</i> &<br>23183314 | BSP2   | Chongqing | 29.56 | 106.55 | 2 | 3 | 3 | 2 | 4 | 5 | 2 | 5 | 3 | 4 | 2 | 3 | 4 | 2 | 4 | 3 | 9  | 3 | 4 | 3 | 4 | 4 | 3 | 3 |
| B185 | 2011      | Zhang, D.<br><i>et al.</i> &<br>23183314 | BSP2   | Chongqing | 29.56 | 106.55 | 2 | 3 | 3 | 3 | 3 | 5 | 2 | 7 | 3 | 5 | 3 | 3 | 4 | 2 | 2 | 3 | 9  | 3 | 4 | 5 | 4 | 4 | 3 | 4 |
| B186 | 2011      | Zhang, D.<br><i>et al.</i> &<br>23183314 | BSPint | Chongqing | 29.56 | 106.55 | 2 | 5 | 2 | 3 | 4 | 5 | 2 | 5 | 2 | 3 | 3 | 2 | 3 | 2 | 4 | 3 | 4  | 3 | 4 | 1 | 4 | 2 | 3 | 2 |
| B187 | 2011      | Zhang, D.<br><i>et al.</i> &<br>23183314 | BSP2   | Chongqing | 29.56 | 106.55 | 2 | 3 | 3 | 3 | 4 | 5 | 2 | 7 | 3 | 5 | 3 | 3 | 4 | 2 | 4 | 6 | 9  | 3 | 4 | 2 | 4 | 4 | 3 | 4 |
| B188 | 2011      | Zhang, D.<br><i>et al.</i> &<br>23183314 | BSP2   | Chongqing | 29.56 | 106.55 | 2 | 3 | 3 | 3 | 4 | 5 | 2 | 4 | 3 | 5 | 4 | 3 | 4 | 2 | 4 | 6 | 7  | 3 | 4 | 4 | 3 | 4 | 3 | 4 |
| B189 | 2011      | Zhang, D.<br><i>et al.</i> &<br>23183314 | BSP1   | Chongqing | 29.56 | 106.55 | 2 | 5 | 2 | 3 | 3 | 5 | 2 | 7 | 2 | 3 | 2 | 2 | 4 | 2 | 4 | 3 | 6  | 3 | 4 | 1 | 3 | 2 | 3 | 2 |
| B190 | 2011      | Zhang, D.<br><i>et al.</i> &<br>23183314 | BSPint | Chongqing | 29.56 | 106.55 | 2 | 5 | 2 | 3 | 4 | 5 | 2 | 5 | 2 | 3 | 3 | 2 | 4 | 2 | 4 | 3 | 4  | 3 | 4 | 1 | 4 | 2 | 3 | 2 |
| B191 | 2011      | Zhang, D.<br><i>et al.</i> &<br>23183314 | BSP2   | Chongqing | 29.56 | 106.55 | 2 | 3 | 2 | 3 | 4 | 5 | 2 | 7 | 3 | 3 | 3 | 3 | 4 | 2 | 4 | 1 | 9  | 3 | 4 | 3 | 4 | 2 | 3 | 4 |
| B192 | 2011      | Zhang, D.<br><i>et al.</i> &<br>23183314 | BSP2   | Chongqing | 29.56 | 106.55 | 2 | 3 | 2 | 3 | 4 | 5 | 2 | 6 | 3 | 3 | 3 | 3 | 4 | 2 | 4 | 2 | 9  | 3 | 4 | 3 | 4 | 4 | 3 | 4 |
| B193 | 2011      | Zhang, D.<br><i>et al.</i> &<br>23183314 | BSP2   | Chongqing | 29.56 | 106.55 | 2 | 3 | 3 | 3 | 4 | 6 | 2 | 7 | 3 | 5 | 3 | 3 | 4 | 2 | 4 | 6 | ND | 3 | 6 | 4 | 4 | 4 | 3 | 4 |
| B194 | 2011      | Zhang, D.<br><i>et al.</i> &<br>23183314 | BSP2   | Chongqing | 29.56 | 106.55 | 2 | 3 | 3 | 3 | 4 | 5 | 2 | 4 | 3 | 3 | 2 | 3 | 4 | 2 | 4 | 3 | 9  | 3 | 4 | 3 | 4 | 4 | 2 | 3 |
| B195 | 2011      | Zhang, D.<br><i>et al.</i> &<br>23183314 | BSP2   | Chongqing | 29.56 | 106.55 | 2 | 3 | 3 | 3 | 4 | 5 | 2 | 7 | 3 | 5 | 3 | 3 | 4 | 2 | 4 | 6 | 6  | 3 | 4 | 4 | 4 | 4 | 3 | 4 |
| B196 | 2011      | Zhang, D.<br><i>et al.</i> &<br>23183314 | BSP2   | Chongqing | 29.56 | 106.55 | 2 | 3 | 3 | 3 | 4 | 5 | 2 | 6 | 3 | 5 | 3 | 3 | 4 | 2 | 4 | 6 | 9  | 3 | 4 | 4 | 4 | 4 | 3 | 4 |
| B197 | 2011      | Zhang, D.<br><i>et al.</i> &<br>23183314 | BSP2   | Chongqing | 29.56 | 106.55 | 2 | 3 | 3 | 3 | 4 | 5 | 2 | 7 | 3 | 5 | 3 | 3 | 4 | 2 | 4 | 5 | 9  | 3 | 6 | 5 | 4 | 4 | 3 | 4 |
| B198 | 2011      | Zhang, D.<br><i>et al.</i> &<br>23183314 | BSP2   | Chongqing | 29.56 | 106.55 | 2 | 3 | 3 | 3 | 4 | 5 | 2 | 4 | 3 | 3 | 3 | 3 | 4 | 3 | 4 | 5 | 8  | 3 | 4 | 2 | 4 | 4 | 3 | 4 |
| B199 | 2011      | Zhang, D.<br><i>et al.</i> &<br>23183314 | BSP2   | Chongqing | 29.56 | 106.55 | 2 | 3 | 3 | 3 | 4 | 5 | 2 | 7 | 3 | 6 | 3 | 3 | 4 | 2 | 3 | 3 | 8  | 5 | 4 | 4 | 4 | 4 | 3 | 4 |
| B200 | 2003-2007 | Chen, Y.<br><i>et al.</i> &<br>22808061  | BSP4   | Taiwan    | 23.70 | 120.96 | 2 | 2 | 3 | 3 | 2 | 5 | 1 | 4 | 3 | 5 | 3 | 3 | 4 | 2 | 4 | 4 | 9  | 4 | 3 | 4 | 4 | 4 | 3 | 3 |
| B201 | 2003-2007 | Chen, Y.<br><i>et al.</i> &<br>22808061  | BSP4   | Taiwan    | 23.70 | 120.96 | 2 | 2 | 3 | 3 | 2 | 5 | 1 | 7 | 3 | 5 | 2 | 3 | 4 | 2 | 4 | 3 | 7  | 3 | 3 | 4 | 4 | 4 | 3 | 3 |
| B202 | 2003-2007 | Chen, Y.<br><i>et al.</i> &<br>22808061  | BSP4   | Taiwan    | 23.70 | 120.96 | 2 | 2 | 3 | 3 | 2 | 5 | 1 | 7 | 3 | 5 | 2 | 3 | 4 | 2 | 4 | 4 | 8  | 3 | 3 | 4 | 4 | 4 | 3 | 3 |



















|      |           |                                   |        |         |       |        |   |   |   |   |   |   |   |   |   |   |   |   |   |   |   |   |    |   |   |   |   |   |   |   |
|------|-----------|-----------------------------------|--------|---------|-------|--------|---|---|---|---|---|---|---|---|---|---|---|---|---|---|---|---|----|---|---|---|---|---|---|---|
| B531 | 2003-2007 | Chen, Y. <i>et al.</i> & 22808061 | BSP4   | Taiwan  | 23.70 | 120.96 | 2 | 2 | 3 | 3 | 2 | 5 | 1 | 7 | 3 | 5 | 3 | 4 | 4 | 2 | 4 | 7 | 8  | 4 | 3 | 4 | 4 | 4 | 3 | 3 |
| B532 | 2003-2007 | Chen, Y. <i>et al.</i> & 22808061 | BSP5   | Taiwan  | 23.70 | 120.96 | 2 | 2 | 3 | 3 | 2 | 5 | 1 | 7 | 3 | 5 | 3 | 4 | 3 | 2 | 4 | 3 | 8  | 2 | 1 | 5 | 4 | 4 | 3 | 3 |
| B533 | 2003-2007 | Chen, Y. <i>et al.</i> & 22808061 | BSP4   | Taiwan  | 23.70 | 120.96 | 2 | 2 | 3 | 3 | 2 | 5 | 1 | 9 | 3 | 5 | 3 | 3 | 4 | 2 | 4 | 4 | 8  | 5 | 4 | 4 | 4 | 4 | 3 | 3 |
| B534 | 2003-2007 | Chen, Y. <i>et al.</i> & 22808061 | BSP4   | Taiwan  | 23.70 | 120.96 | 2 | 2 | 3 | 3 | 2 | 5 | 1 | 7 | 3 | 5 | 3 | 3 | 4 | 2 | 4 | 7 | ND | 4 | 4 | 4 | 4 | 4 | 3 | 3 |
| B535 | 2003-2007 | Chen, Y. <i>et al.</i> & 22808061 | BSP4   | Taiwan  | 23.70 | 120.96 | 2 | 2 | 3 | 4 | 2 | 5 | 1 | 7 | 3 | 5 | 3 | 3 | 4 | 2 | 4 | 7 | 2  | 4 | 3 | 4 | 4 | 4 | 3 | 3 |
| B536 | 2003-2007 | Chen, Y. <i>et al.</i> & 22808061 | BSP5   | Taiwan  | 23.70 | 120.96 | 2 | 2 | 3 | 3 | 2 | 5 | 1 | 5 | 3 | 5 | 2 | 3 | 3 | 2 | 4 | 6 | 8  | 2 | 4 | 4 | 4 | 4 | 3 | 3 |
| B537 | 2003-2007 | Chen, Y. <i>et al.</i> & 22808061 | BSP4   | Taiwan  | 23.70 | 120.96 | 2 | 4 | 3 | 3 | 2 | 5 | 1 | 7 | 3 | 5 | 3 | 4 | 4 | 2 | 4 | 3 | 7  | 4 | 4 | 4 | 4 | 4 | 3 | 4 |
| B538 | 2008      | Zhao, Y. <i>et al.</i> & 21989209 | BSP1   | Sichuan | 30.65 | 104.08 | 2 | 3 | 3 | 3 | 2 | 5 | 1 | 7 | 2 | 4 | 3 | 3 | 3 | 2 | 4 | 4 | 7  | 1 | 4 | 7 | 4 | 2 | 3 | 4 |
| B539 | 2008      | Zhao, Y. <i>et al.</i> & 21989209 | BSP1   | Sichuan | 30.65 | 104.08 | 2 | 3 | 3 | 3 | 2 | 5 | 1 | 7 | 2 | 4 | 4 | 3 | 4 | 2 | 4 | 4 | 8  | 1 | 4 | 6 | 4 | 4 | 3 | 4 |
| B540 | 2008      | Zhao, Y. <i>et al.</i> & 21989209 | BSP1   | Sichuan | 30.65 | 104.08 | 2 | 3 | 3 | 3 | 2 | 5 | 1 | 7 | 2 | 4 | 3 | 5 | 3 | 2 | 4 | 4 | 8  | 1 | 5 | 7 | 4 | 2 | 3 | 4 |
| B541 | 2008      | Zhao, Y. <i>et al.</i> & 21989209 | BSPint | Sichuan | 30.65 | 104.08 | 2 | 3 | 3 | 3 | 2 | 5 | 1 | 7 | 2 | 4 | 3 | 3 | 4 | 2 | 4 | 6 | 8  | 2 | 4 | 4 | 2 | 4 | 3 | 4 |
| B542 | 2008      | Zhao, Y. <i>et al.</i> & 21989209 | BSPint | Sichuan | 30.65 | 104.08 | 2 | 3 | 3 | 3 | 2 | 5 | 1 | 7 | 3 | 4 | 3 | 3 | 4 | 2 | 4 | 6 | ND | 2 | 4 | 3 | 4 | 4 | 3 | 4 |
| B543 | 2008      | Zhao, Y. <i>et al.</i> & 21989209 | BSP1   | Sichuan | 30.65 | 104.08 | 2 | 3 | 3 | 3 | 2 | 5 | 1 | 4 | 4 | 4 | 4 | 3 | 4 | 2 | 4 | 2 | 8  | 2 | 4 | 4 | 4 | 4 | 3 | 4 |
| B544 | 2008      | Zhao, Y. <i>et al.</i> & 21989209 | BSP1   | Sichuan | 30.65 | 104.08 | 2 | 3 | 3 | 3 | 2 | 5 | 1 | 9 | 4 | 4 | 4 | 3 | 4 | 2 | 5 | 2 | 6  | 2 | 4 | 4 | 4 | 6 | 3 | 5 |
| B545 | 2008      | Zhao, Y. <i>et al.</i> & 21989209 | BSP1   | Sichuan | 30.65 | 104.08 | 2 | 3 | 2 | 3 | 2 | 5 | 1 | 7 | 3 | 4 | 4 | 5 | 4 | 2 | 4 | 6 | 7  | 3 | 2 | 4 | 4 | 4 | 3 | 4 |
| B546 | 2008      | Zhao, Y. <i>et al.</i> & 21989209 | BSP1   | Sichuan | 30.65 | 104.08 | 2 | 3 | 3 | 4 | 2 | 5 | 1 | 3 | 2 | 4 | 4 | 5 | 4 | 2 | 5 | 2 | 6  | 4 | 3 | 4 | 4 | 4 | 3 | 4 |
| B547 | 2008      | Zhao, Y. <i>et al.</i> & 21989209 | BSP1   | Sichuan | 30.65 | 104.08 | 2 | 3 | 2 | 1 | 2 | 5 | 1 | 7 | 2 | 4 | 3 | 5 | 4 | 2 | 4 | 6 | 8  | 2 | 2 | 4 | 4 | 4 | 3 | 4 |
| B548 | 2008      | Zhao, Y. <i>et al.</i> & 21989209 | BSP1   | Sichuan | 30.65 | 104.08 | 2 | 3 | 2 | 3 | 2 | 5 | 1 | 7 | 2 | 5 | 4 | 5 | 4 | 2 | 4 | 7 | 7  | 4 | 4 | 5 | 4 | 4 | 3 | 5 |
| B549 | 2008      | Zhao, Y. <i>et al.</i> & 21989209 | BSP1   | Sichuan | 30.65 | 104.08 | 2 | 3 | 2 | 3 | 2 | 5 | 1 | 7 | 2 | 5 | 4 | 5 | 4 | 2 | 4 | 6 | 3  | 2 | 4 | 6 | 4 | 4 | 3 | 5 |
| B550 | 2008      | Zhao, Y. <i>et al.</i> & 21989209 | BSP1   | Sichuan | 30.65 | 104.08 | 2 | 3 | 2 | 3 | 2 | 5 | 1 | 7 | 2 | 4 | 3 | 5 | 4 | 2 | 4 | 7 | 7  | 4 | 0 | 5 | 4 | 4 | 3 | 5 |
| B551 | 2008      | Zhao, Y. <i>et al.</i> & 21989209 | BSP1   | Sichuan | 30.65 | 104.08 | 2 | 3 | 2 | 3 | 2 | 5 | 1 | 7 | 3 | 5 | 4 | 5 | 4 | 2 | 4 | 6 | 8  | 1 | 4 | 5 | 4 | 4 | 3 | 4 |
| B552 | 2008      | Zhao, Y. <i>et al.</i> & 21989209 | BSP1   | Sichuan | 30.65 | 104.08 | 2 | 3 | 2 | 3 | 2 | 5 | 1 | 6 | 2 | 5 | 4 | 5 | 4 | 2 | 4 | 7 | 8  | 4 | 2 | 5 | 4 | 4 | 2 | 5 |
| B553 | 2008      | Zhao, Y. <i>et al.</i> & 21989209 | BSP1   | Sichuan | 30.65 | 104.08 | 2 | 3 | 2 | 3 | 2 | 8 | 1 | 2 | 1 | 5 | 3 | 5 | 4 | 2 | 4 | 5 | 6  | 2 | 2 | 5 | 4 | 4 | 3 | 4 |
| B554 | 2008      | Zhao, Y. <i>et al.</i> & 21989209 | BSP1   | Sichuan | 30.65 | 104.08 | 2 | 3 | 2 | 2 | 2 | 5 | 1 | 7 | 2 | 4 | 2 | 3 | 4 | 2 | 4 | 3 | 8  | 1 | 4 | 5 | 4 | 4 | 3 | 4 |
| B555 | 2008      | Zhao, Y. <i>et al.</i> & 21989209 | BSP1   | Sichuan | 30.65 | 104.08 | 2 | 3 | 2 | 3 | 2 | 5 | 1 | 7 | 2 | 4 | 1 | 3 | 4 | 2 | 4 | 6 | 8  | 1 | 2 | 5 | 4 | 4 | 3 | 4 |
| B556 | 2008      | Zhao, Y. <i>et al.</i> & 21989209 | BSP1   | Sichuan | 30.65 | 104.08 | 2 | 3 | 3 | 2 | 2 | 5 | 1 | 8 | 2 | 4 | 1 | 2 | 4 | 2 | 4 | 6 | 8  | 1 | 3 | 5 | 4 | 4 | 3 | 4 |
| B557 | 2008      | Zhao, Y. <i>et al.</i> & 21989209 | BSP1   | Sichuan | 30.65 | 104.08 | 2 | 3 | 3 | 2 | 2 | 5 | 1 | 8 | 2 | 4 | 2 | 2 | 4 | 2 | 4 | 5 | 2  | 3 | 2 | 4 | 5 | 4 | 3 | 4 |
| B558 | 2008      | Zhao, Y. <i>et al.</i> & 21989209 | BSP1   | Sichuan | 30.65 | 104.08 | 2 | 3 | 3 | 2 | 2 | 5 | 1 | 6 | 2 | 4 | 2 | 2 | 4 | 2 | 4 | 6 | 8  | 1 | 3 | 5 | 4 | 4 | 3 | 4 |
| B559 | 2008      | Zhao, Y. <i>et al.</i> & 21989209 | BSP1   | Sichuan | 30.65 | 104.08 | 2 | 3 | 3 | 2 | 2 | 5 | 1 | 8 | 2 | 4 | 1 | 2 | 4 | 2 | 4 | 6 | 7  | 1 | 3 | 5 | 4 | 4 | 3 | 3 |
| B560 | 2008      | Zhao, Y. <i>et al.</i> & 21989209 | BSP1   | Sichuan | 30.65 | 104.08 | 2 | 3 | 3 | 2 | 2 | 5 | 1 | 8 | 2 | 4 | 2 | 2 | 4 | 2 | 4 | 6 | ND | 1 | 6 | 3 | 4 | 4 | 3 | 4 |
| B561 | 2008      | Zhao, Y. <i>et al.</i> & 21989209 | BSP1   | Sichuan | 30.65 | 104.08 | 2 | 3 | 2 | 2 | 2 | 5 | 1 | 3 | 2 | 4 | 1 | 1 | 4 | 2 | 4 | 3 | 6  | 1 | 2 | 5 | 4 | 4 | 3 | 4 |
| B562 | 2008      | Zhao, Y. <i>et al.</i> & 21989209 | BSP1   | Sichuan | 30.65 | 104.08 | 2 | 3 | 3 | 2 | 2 | 5 | 1 | 4 | 2 | 4 | 2 | 1 | 4 | 2 | 4 | 4 | 6  | 1 | 2 | 4 | 4 | 4 | 3 | 4 |
| B563 | 2008      | Zhao, Y. <i>et al.</i> & 21989209 | BSP1   | Sichuan | 30.65 | 104.08 | 2 | 3 | 3 | 2 | 2 | 5 | 1 | 7 | 2 | 4 | 2 | 3 | 4 | 2 | 4 | 3 | 2  | 3 | 2 | 4 | 4 | 4 | 3 | 4 |
| B564 | 2008      | Zhao, Y. <i>et al.</i> & 21989209 | BSP1   | Sichuan | 30.65 | 104.08 | 2 | 3 | 3 | 2 | 2 | 5 | 1 | 4 | 2 | 4 | 2 | 2 | 4 | 2 | 4 | 3 | 6  | 1 | 2 | 5 | 4 | 4 | 3 | 4 |
| B565 | 2008      | Zhao, Y. <i>et al.</i> & 21989209 | BSP1   | Sichuan | 30.65 | 104.08 | 2 | 3 | 3 | 1 | 2 | 5 | 1 | 1 | 2 | 3 | 1 | 3 | 4 | 2 | 4 | 6 | 9  | 1 | 2 | 4 | 4 | 4 | 3 | 3 |
| B566 | 2008      | Zhao, Y. <i>et al.</i> & 21989209 | BSP1   | Sichuan | 30.65 | 104.08 | 2 | 3 | 3 | 1 | 2 | 5 | 1 | 7 | 1 | 4 | 1 | 3 | 4 | 2 | 4 | 4 | 8  | 1 | 2 | 5 | 4 | 4 | 3 | 4 |
| B567 | 2008      | Zhao, Y. <i>et al.</i> & 21989209 | BSP1   | Sichuan | 30.65 | 104.08 | 2 | 3 | 3 | 1 | 2 | 5 | 1 | 7 | 2 | 4 | 1 | 4 | 4 | 2 | 4 | 4 | 8  | 1 | 2 | 5 | 4 | 4 | 3 | 4 |
| B568 | 2008      | Zhao, Y. <i>et al.</i> & 21989209 | BSP1   | Sichuan | 30.65 | 104.08 | 2 | 3 | 3 | 2 | 2 | 5 | 1 | 8 | 2 | 4 | 2 | 3 | 3 | 2 | 4 | 6 | 7  | 3 | 1 | 4 | 4 | 4 | 3 | 4 |
| B569 | 2008      | Zhao, Y. <i>et al.</i> & 21989209 | BSP1   | Sichuan | 30.65 | 104.08 | 2 | 3 | 3 | 2 | 2 | 5 | 1 | 6 | 2 | 4 | 3 | 2 | 4 | 2 | 4 | 5 | 7  | 1 | 2 | 5 | 4 | 4 | 3 | 5 |
| B570 | 2008      | Zhao, Y. <i>et al.</i> & 21989209 | BSP1   | Sichuan | 30.65 | 104.08 | 2 | 3 | 2 | 2 | 2 | 5 | 1 | 6 | 2 | 4 | 2 | 3 | 4 | 2 | 4 | 6 | 8  | 4 | 3 | 4 | 2 | 4 | 3 | 3 |
| B571 | 2008      | Zhao, Y. <i>et al.</i> & 21989209 | BSP1   | Sichuan | 30.65 | 104.08 | 2 | 3 | 2 | 2 | 2 | 5 | 1 | 4 | 2 | 4 | 2 | 3 | 4 | 2 | 4 | 5 | 8  | 1 | 2 | 5 | 2 | 4 | 3 | 3 |

|      |      |                                         |        |         |       |        |   |   |   |   |   |   |   |   |   |   |   |    |    |   |   |    |   |   |   |   |   |   |   |   |
|------|------|-----------------------------------------|--------|---------|-------|--------|---|---|---|---|---|---|---|---|---|---|---|----|----|---|---|----|---|---|---|---|---|---|---|---|
| B572 | 2008 | Zhao, Y.<br><i>et al.</i> &<br>21989209 | BSP1   | Sichuan | 30.65 | 104.08 | 2 | 3 | 2 | 1 | 2 | 5 | 1 | 5 | 2 | 3 | 2 | 3  | 4  | 2 | 4 | 5  | 8 | 1 | 3 | 5 | 4 | 4 | 3 | 3 |
| B573 | 2008 | Zhao, Y.<br><i>et al.</i> &<br>21989209 | BSP1   | Sichuan | 30.65 | 104.08 | 2 | 3 | 2 | 2 | 2 | 5 | 1 | 6 | 2 | 4 | 2 | 4  | 4  | 2 | 4 | 5  | 8 | 1 | 3 | 5 | 4 | 5 | 3 | 3 |
| B574 | 2008 | Zhao, Y.<br><i>et al.</i> &<br>21989209 | BSP1   | Sichuan | 30.65 | 104.08 | 2 | 3 | 2 | 1 | 2 | 5 | 1 | 6 | 1 | 4 | 2 | 3  | 4  | 2 | 4 | 6  | 8 | 3 | 3 | 4 | 2 | 4 | 3 | 3 |
| B575 | 2008 | Zhao, Y.<br><i>et al.</i> &<br>21989209 | BSP1   | Sichuan | 30.65 | 104.08 | 2 | 3 | 1 | 1 | 2 | 5 | 1 | 4 | 1 | 3 | 3 | ND | 4  | 2 | 4 | 5  | 6 | 1 | 3 | 5 | 4 | 4 | 3 | 3 |
| B576 | 2008 | Zhao, Y.<br><i>et al.</i> &<br>21989209 | BSP1   | Sichuan | 30.65 | 104.08 | 2 | 3 | 2 | 1 | 2 | 5 | 1 | 6 | 1 | 1 | 2 | 3  | 4  | 2 | 4 | 5  | 8 | 1 | 3 | 5 | 4 | 4 | 3 | 2 |
| B577 | 2008 | Zhao, Y.<br><i>et al.</i> &<br>21989209 | BSP1   | Sichuan | 30.65 | 104.08 | 2 | 3 | 2 | 1 | 2 | 5 | 1 | 5 | 2 | 3 | 2 | 3  | 4  | 2 | 4 | 5  | 8 | 1 | 3 | 5 | 4 | 4 | 3 | 3 |
| B578 | 2008 | Zhao, Y.<br><i>et al.</i> &<br>21989209 | BSP1   | Sichuan | 30.65 | 104.08 | 2 | 3 | 3 | 2 | 2 | 7 | 1 | 7 | 3 | 5 | 1 | 3  | 4  | 2 | 4 | ND | 7 | 0 | 4 | 4 | 4 | 4 | 3 | 4 |
| B579 | 2008 | Zhao, Y.<br><i>et al.</i> &<br>21989209 | BSPint | Sichuan | 30.65 | 104.08 | 2 | 2 | 3 | 2 | 2 | 5 | 1 | 7 | 3 | 4 | 3 | 3  | 4  | 2 | 4 | 4  | 5 | 0 | 4 | 5 | 4 | 4 | 3 | 3 |
| B580 | 2008 | Zhao, Y.<br><i>et al.</i> &<br>21989209 | BSP1   | Sichuan | 30.65 | 104.08 | 2 | 3 | 3 | 2 | 2 | 5 | 1 | 5 | 3 | 5 | 3 | 2  | 4  | 2 | 4 | 4  | 7 | 1 | 3 | 4 | 4 | 4 | 3 | 4 |
| B581 | 2008 | Zhao, Y.<br><i>et al.</i> &<br>21989209 | BSP1   | Sichuan | 30.65 | 104.08 | 2 | 3 | 3 | 2 | 2 | 5 | 1 | 7 | 3 | 4 | 3 | 3  | 3  | 2 | 4 | 4  | 7 | 0 | 3 | 6 | 4 | 2 | 3 | 3 |
| B582 | 2008 | Zhao, Y.<br><i>et al.</i> &<br>21989209 | BSP1   | Sichuan | 30.65 | 104.08 | 2 | 3 | 3 | 3 | 2 | 5 | 1 |   | 3 | 4 | 3 | 2  | 3  | 2 | 4 | 4  | 7 | 0 | 3 | 4 | 4 | 4 | 3 | 3 |
| B583 | 2008 | Zhao, Y.<br><i>et al.</i> &<br>21989209 | BSP1   | Sichuan | 30.65 | 104.08 | 2 | 3 | 1 | 2 | 2 | 5 | 1 | 7 | 3 | 5 | 3 | 2  | 4  | 2 | 4 | 6  | 7 | 0 | 4 | 3 | 4 | 4 | 3 | 3 |
| B584 | 2008 | Zhao, Y.<br><i>et al.</i> &<br>21989209 | BSP1   | Sichuan | 30.65 | 104.08 | 2 | 3 | 2 | 2 | 2 | 5 | 1 | 7 | 4 | 4 | 2 | 2  | 4  | 2 | 4 | 4  | 6 | 0 | 3 | 5 | 4 | 4 | 3 | 3 |
| B585 | 2008 | Zhao, Y.<br><i>et al.</i> &<br>21989209 | BSP1   | Sichuan | 30.65 | 104.08 | 2 | 3 | 2 | 1 | 2 | 5 | 1 | 7 | 3 | 4 | 2 | 2  | 4  | 2 | 4 | 5  | 8 | 0 | 3 | 5 | 4 | 4 | 3 | 2 |
| B586 | 2008 | Zhao, Y.<br><i>et al.</i> &<br>21989209 | BSP1   | Sichuan | 30.65 | 104.08 | 2 | 3 | 1 | 1 | 2 | 5 | 1 | 7 | 3 | 4 | 3 | 2  | 3  | 2 | 4 | 3  | 7 | 0 | 3 | 2 | 4 | 2 | 3 | 3 |
| B587 | 2008 | Zhao, Y.<br><i>et al.</i> &<br>21989209 | BSP1   | Sichuan | 30.65 | 104.08 | 2 | 3 | 2 | 3 | 2 | 5 | 1 | 4 | 3 | 3 | 2 | 1  | ND | 2 | 4 | 3  | 7 | 0 | 1 | 2 | 4 | 4 | 3 | 5 |
| B588 | 2008 | Zhao, Y.<br><i>et al.</i> &<br>21989209 | BSP1   | Sichuan | 30.65 | 104.08 | 2 | 3 | 3 | 1 | 2 | 4 | 1 | 7 | 3 | 3 | 3 | 3  | 4  | 2 | 4 | 4  | 7 | 1 | 2 | 5 | 4 | 4 | 3 | 3 |
| B589 | 2008 | Zhao, Y.<br><i>et al.</i> &<br>21989209 | BSP1   | Sichuan | 30.65 | 104.08 | 2 | 3 | 2 | 1 | 2 | 4 | 1 | 6 | 3 | 3 | 3 | 3  | 4  | 2 | 4 | 5  | 7 | 1 | 2 | 6 | 2 | 4 | 3 | 3 |
| B590 | 2008 | Zhao, Y.<br><i>et al.</i> &<br>21989209 | BSP1   | Sichuan | 30.65 | 104.08 | 2 | 3 | 2 | 1 | 2 | 4 | 1 | 8 | 3 | 3 | 3 | 3  | 4  | 2 | 4 | 5  | 6 | 1 | 2 | 7 | 4 | 4 | 3 | 4 |
| B591 | 2008 | Zhao, Y.<br><i>et al.</i> &<br>21989209 | BSP1   | Sichuan | 30.65 | 104.08 | 2 | 3 | 2 | 1 | 2 | 4 | 1 | 7 | 3 | 3 | 3 | 3  | 2  | 2 | 4 | 4  | 6 | 2 | 2 | 5 | 4 | 4 | 2 | 3 |
| B592 | 2008 | Zhao, Y.<br><i>et al.</i> &<br>21989209 | BSP1   | Sichuan | 30.65 | 104.08 | 2 | 3 | 2 | 0 | 2 | 4 | 1 | 8 | 3 | 3 | 3 | 3  | ND | 2 | 4 | 5  | 7 | 1 | 1 | 9 | 4 | 4 | 3 | 3 |
| B593 | 2008 | Zhao, Y.<br><i>et al.</i> &<br>21989209 | BSP1   | Sichuan | 30.65 | 104.08 | 2 | 3 | 2 | 1 | 2 | 4 | 1 | 8 | 3 | 3 | 3 | 2  | 4  | 2 | 4 | 4  | 8 | 1 | 2 | 6 | 4 | 4 | 3 | 3 |
| B594 | 2008 | Zhao, Y.<br><i>et al.</i> &<br>21989209 | BSP1   | Sichuan | 30.65 | 104.08 | 2 | 2 | 2 | 2 | 2 | 4 | 1 | 3 | 3 | 5 | 3 | 3  | 4  | 2 | 4 | 3  | 8 | 1 | 2 | 4 | 4 | 4 | 3 | 4 |
| B595 | 2008 | Zhao, Y.<br><i>et al.</i> &<br>21989209 | BSP1   | Sichuan | 30.65 | 104.08 | 2 | 3 | 3 | 3 | 2 | 5 | 1 | 6 | 3 | 4 | 3 | 3  | 4  | 2 | 4 | 5  | 7 | 1 | 3 | 4 | 4 | 4 | 3 | 4 |
| B596 | 2008 | Zhao, Y.<br><i>et al.</i> &<br>21989209 | BSPint | Sichuan | 30.65 | 104.08 | 2 | 2 | 3 | 3 | 2 | 5 | 1 | 7 | 2 | 5 | 3 | 3  | 4  | 2 | 4 | 4  | 7 | 3 | 4 | 5 | 4 | 4 | 3 | 3 |
| B597 | 2008 | Zhao, Y.<br><i>et al.</i> &<br>21989209 | BSP5   | Sichuan | 30.65 | 104.08 | 2 | 2 | 3 | 3 | 2 | 5 | 1 | 7 | 3 | 5 | 4 | 3  | 3  | 2 | 4 | 4  | 7 | 2 | 3 | 5 | 4 | 4 | 3 | 2 |
| B598 | 2008 | Zhao, Y.<br><i>et al.</i> &<br>21989209 | BSP1   | Sichuan | 30.65 | 104.08 | 2 | 2 | 3 | 3 | 2 | 5 | 1 | 7 | 3 | 5 | 4 | 4  | 4  | 2 | 4 | 3  | 1 | 3 | 3 | 4 | 4 | 4 | 3 | 1 |
| B599 | 2008 | Zhao, Y.<br><i>et al.</i> &<br>21989209 | BSP1   | Sichuan | 30.65 | 104.08 | 2 | 2 | 4 | 3 | 2 | 5 | 1 | 4 | 3 | 5 | 4 | 2  | 4  | 2 | 4 | 3  | 5 | 2 | 3 | 5 | 4 | 4 | 3 | 3 |
| B600 | 2008 | Zhao, Y.<br><i>et al.</i> &<br>21989209 | BSP1   | Sichuan | 30.65 | 104.08 | 2 | 2 | 4 | 3 | 2 | 5 | 1 | 4 | 3 | 6 | 4 | 3  | 4  | 2 | 4 | 5  | 7 | 2 | 1 | 5 | 4 | 4 | 3 | 2 |
| B601 | 2008 | Zhao, Y.<br><i>et al.</i> &<br>21989209 | BSP1   | Sichuan | 30.65 | 104.08 | 2 | 2 | 4 | 4 | 2 | 5 | 1 | 6 | 4 | 6 | 6 | 2  | 4  | 2 | 4 | 4  | 5 | 1 | 1 | 4 | 4 | 4 | 3 | 2 |
| B602 | 2008 | Zhao, Y.<br><i>et al.</i> &<br>21989209 | BSP1   | Sichuan | 30.65 | 104.08 | 2 | 3 | 3 | 3 | 2 | 5 | 1 | 7 | 2 | 4 | 4 | 3  | 4  | 2 | 4 | 4  | 8 | 1 | 4 | 6 | 4 | 4 | 3 | 4 |
| B603 | 2008 | Zhao, Y.<br><i>et al.</i> &<br>21989209 | BSP1   | Sichuan | 30.65 | 104.08 | 2 | 3 | 3 | 3 | 2 | 5 | 1 | 7 | 1 | 4 | 4 | 3  | 4  | 2 | 4 | 4  | 8 | 1 | 4 | 6 | 4 | 4 | 3 | 3 |
| B604 | 2008 | Zhao, Y.<br><i>et al.</i> &<br>21989209 | BSP1   | Sichuan | 30.65 | 104.08 | 2 | 3 | 3 | 3 | 2 | 5 | 1 | 7 | 2 | 4 | 4 | 3  | 4  | 2 | 4 | 5  | 8 | 1 | 4 | 6 | 4 | 4 | 3 | 3 |
| B605 | 2008 | Zhao, Y.<br><i>et al.</i> &<br>21989209 | BSP1   | Sichuan | 30.65 | 104.08 | 2 | 3 | 3 | 4 | 2 | 5 | 1 | 3 | 2 | 4 | 4 | 3  | 4  | 2 | 5 | 2  | 6 | 2 | 3 | 4 | 4 | 4 | 3 | 3 |
| B606 | 2008 | Zhao, Y.<br><i>et al.</i> &<br>21989209 | BSP1   | Sichuan | 30.65 | 104.08 | 2 | 3 | 3 | 3 | 2 | 5 | 1 | 7 | 2 | 4 | 4 | 3  | 4  | 2 | 4 | ND | 8 | 2 | 4 | 4 | 4 | 4 | 3 | 3 |
| B607 | 2008 | Zhao, Y.<br><i>et al.</i> &<br>21989209 | BSP1   | Sichuan | 30.65 | 104.08 | 2 | 3 | 3 | 3 | 2 | 5 | 1 | 5 | 2 | 4 | 5 | 2  | 4  | 2 | 4 | 4  | 6 | 1 | 4 | 4 | 4 | 4 | 3 | 3 |
| B608 | 2008 | Zhao, Y.<br><i>et al.</i> &<br>21989209 | BSP1   | Sichuan | 30.65 | 104.08 | 2 | 3 | 3 | 3 | 2 | 5 | 1 | 7 | 1 | 5 | 4 | 1  | 4  | 2 | 4 | 5  | 9 | 1 | 3 | 4 | 4 | 4 | 3 | 4 |
| B609 | 2008 | Zhao, Y.<br><i>et al.</i> &<br>21989209 | BSP1   | Sichuan | 30.65 | 104.08 | 2 | 3 | 3 | 3 | 2 | 5 | 1 | 7 | 2 | 4 | 4 | 3  | 3  | 2 | 4 | 3  | 7 | 0 | 3 | 5 | 4 | 4 | 3 | 3 |
| B610 | 2008 | Zhao, Y.<br><i>et al.</i> &<br>21989209 | BSP1   | Sichuan | 30.65 | 104.08 | 2 | 3 | 3 | 3 | 2 | 5 | 1 | 4 | 2 | 4 | 4 | 2  | 4  | 2 | 4 | 3  | 5 | 0 | 4 | 5 | 4 | 4 | 3 | 3 |
| B611 | 2008 | Zhao, Y.<br><i>et al.</i> &<br>21989209 | BSP1   | Sichuan | 30.65 | 104.08 | 2 | 3 | 3 | 3 | 2 | 5 | 1 | 4 | 2 | 2 | 3 | 3  | 3  | 2 | 4 | 5  | 7 | 2 | 4 | 4 | 4 | 4 | 3 | 4 |
| B612 | 2008 | Zhao, Y.<br><i>et al.</i> &<br>21989209 | BSPint | Sichuan | 30.65 | 104.08 | 2 | 3 | 3 | 3 | 2 | 5 | 1 | 7 | 2 | 4 | 2 | 3  | 4  | 2 | 4 | 6  | 7 | 2 | 4 | 4 | 4 | 4 | 3 | 3 |

|      |      |                                         |      |         |       |        |   |   |   |   |   |   |   |   |   |   |   |   |   |   |   |    |    |   |   |   |   |   |   |   |
|------|------|-----------------------------------------|------|---------|-------|--------|---|---|---|---|---|---|---|---|---|---|---|---|---|---|---|----|----|---|---|---|---|---|---|---|
| B613 | 2008 | Zhao, Y.<br><i>et al.</i> &<br>21989209 | BSP1 | Sichuan | 30.65 | 104.08 | 2 | 3 | 3 | 3 | 2 | 5 | 1 | 6 | 3 | 4 | 4 | 5 | 4 | 2 | 4 | 5  | 8  | 1 | 4 | 6 | 4 | 4 | 3 | 4 |
| B614 | 2008 | Zhao, Y.<br><i>et al.</i> &<br>21989209 | BSP1 | Sichuan | 30.65 | 104.08 | 2 | 3 | 3 | 3 | 2 | 5 | 1 | 7 | 2 | 4 | 3 | 5 | 3 | 2 | 4 | 5  | 7  | 2 | 2 | 7 | 4 | 2 | 3 | 4 |
| B615 | 2008 | Zhao, Y.<br><i>et al.</i> &<br>21989209 | BSP1 | Sichuan | 30.65 | 104.08 | 2 | 3 | 2 | 4 | 2 | 5 | 1 | 6 | 1 | 4 | 3 | 4 | 4 | 2 | 4 | 4  | 8  | 4 | 2 | 6 | 4 | 4 | 3 | 4 |
| B616 | 2008 | Zhao, Y.<br><i>et al.</i> &<br>21989209 | BSP1 | Sichuan | 30.65 | 104.08 | 2 | 3 | 3 | 3 | 2 | 5 | 1 | 7 | 2 | 5 | 3 | 5 | 4 | 2 | 4 | 7  | 8  | 4 | 2 | 4 | 4 | 4 | 2 | 5 |
| B617 | 2008 | Zhao, Y.<br><i>et al.</i> &<br>21989209 | BSP1 | Sichuan | 30.65 | 104.08 | 2 | 3 | 2 | 3 | 2 | 5 | 1 | 7 | 2 | 4 | 3 | 5 | 4 | 2 | 4 | 6  | 8  | 3 | 2 | 6 | 4 | 4 | 3 | 4 |
| B618 | 2008 | Zhao, Y.<br><i>et al.</i> &<br>21989209 | BSP1 | Sichuan | 30.65 | 104.08 | 2 | 3 | 0 | 3 | 2 | 5 | 1 | 7 | 2 | 4 | 3 | 5 | 4 | 2 | 4 | 6  | 8  | 4 | 4 | 5 | 4 | 4 | 3 | 5 |
| B619 | 2008 | Zhao, Y.<br><i>et al.</i> &<br>21989209 | BSP1 | Sichuan | 30.65 | 104.08 | 2 | 3 | 1 | 3 | 2 | 5 | 1 | 6 | 2 | 4 | 3 | 5 | 4 | 2 | 4 | 6  | 8  | 5 | 1 | 7 | 4 | 4 | 3 | 4 |
| B620 | 2008 | Zhao, Y.<br><i>et al.</i> &<br>21989209 | BSP1 | Sichuan | 30.65 | 104.08 | 2 | 3 | 1 | 3 | 2 | 5 | 1 | 7 | 2 | 5 | 4 | 4 | 4 | 2 | 4 | 6  | 8  | 2 | 3 | 5 | 4 | 4 | 3 | 5 |
| B621 | 2008 | Zhao, Y.<br><i>et al.</i> &<br>21989209 | BSP1 | Sichuan | 30.65 | 104.08 | 2 | 3 | 2 | 2 | 2 | 5 | 1 | 6 | 1 | 5 | 3 | 5 | 4 | 2 | 4 | 5  | 7  | 1 | 3 | 6 | 4 | 4 | 3 | 4 |
| B622 | 2008 | Zhao, Y.<br><i>et al.</i> &<br>21989209 | BSP1 | Sichuan | 30.65 | 104.08 | 2 | 4 | 2 | 1 | 2 | 5 | 1 | 5 | 2 | 4 | 2 | 3 | 4 | 2 | 4 | 6  | 8  | 1 | 3 | 5 | 4 | 4 | 3 | 4 |
| B623 | 2008 | Zhao, Y.<br><i>et al.</i> &<br>21989209 | BSP1 | Sichuan | 30.65 | 104.08 | 2 | 3 | 3 | 2 | 2 | 5 | 1 | 6 | 2 | 4 | 2 | 3 | 4 | 2 | 4 | ND | 6  | 2 | 2 | 4 | 4 | 4 | 3 | 4 |
| B624 | 2008 | Zhao, Y.<br><i>et al.</i> &<br>21989209 | BSP1 | Sichuan | 30.65 | 104.08 | 2 | 3 | 2 | 2 | 2 | 5 | 1 | 7 | 2 | 4 | 1 | 2 | 4 | 2 | 4 | 6  | 8  | 1 | 3 | 5 | 4 | 4 | 3 | 4 |
| B625 | 2008 | Zhao, Y.<br><i>et al.</i> &<br>21989209 | BSP1 | Sichuan | 30.65 | 104.08 | 2 | 3 | 2 | 2 | 2 | 5 | 1 | 8 | 2 | 4 | 1 | 2 | 4 | 2 | 3 | 6  | 4  | 1 | 2 | 5 | 4 | 4 | 2 | 4 |
| B626 | 2008 | Zhao, Y.<br><i>et al.</i> &<br>21989209 | BSP1 | Sichuan | 30.65 | 104.08 | 2 | 3 | 1 | 2 | 2 | 5 | 1 | 7 | 2 | 4 | 1 | 3 | 4 | 2 | 4 | 6  | 8  | 1 | 2 | 5 | 4 | 4 | 3 | 4 |
| B627 | 2008 | Zhao, Y.<br><i>et al.</i> &<br>21989209 | BSP1 | Sichuan | 30.65 | 104.08 | 2 | 3 | 3 | 2 | 2 | 5 | 1 | 8 | 2 | 4 | 2 | 2 | 4 | 2 | 4 | 6  | 7  | 1 | 3 | 5 | 4 | 4 | 3 | 4 |
| B628 | 2008 | Zhao, Y.<br><i>et al.</i> &<br>21989209 | BSP1 | Sichuan | 30.65 | 104.08 | 2 | 3 | 3 | 2 | 2 | 5 | 1 | 8 | 2 | 4 | 2 | 1 | 4 | 2 | 4 | 4  | 8  | 1 | 3 | 5 | 4 | 4 | 3 | 4 |
| B629 | 2008 | Zhao, Y.<br><i>et al.</i> &<br>21989209 | BSP1 | Sichuan | 30.65 | 104.08 | 2 | 3 | 3 | 2 | 2 | 5 | 1 | 8 | 2 | 4 | 2 | 2 | 4 | 2 | 4 | 6  | 8  | 1 | 3 | 5 | 4 | 4 | 3 | 4 |
| B630 | 2008 | Zhao, Y.<br><i>et al.</i> &<br>21989209 | BSP1 | Sichuan | 30.65 | 104.08 | 2 | 3 | 1 | 3 | 2 | 5 | 1 | 6 | 2 | 4 | 1 | 2 | 4 | 2 | 4 | 5  | 8  | 3 | 2 | 4 | 4 | 4 | 3 | 4 |
| B631 | 2008 | Zhao, Y.<br><i>et al.</i> &<br>21989209 | BSP1 | Sichuan | 30.65 | 104.08 | 2 | 3 | 2 | 1 | 2 | 5 | 1 | 7 | 2 | 4 | 1 | 3 | 4 | 2 | 4 | 6  | 8  | 1 | 2 | 5 | 4 | 4 | 3 | 4 |
| B632 | 2008 | Zhao, Y.<br><i>et al.</i> &<br>21989209 | BSP1 | Sichuan | 30.65 | 104.08 | 2 | 3 | 3 | 2 | 2 | 5 | 1 | 8 | 2 | 3 | 2 | 3 | 4 | 2 | 4 | 4  | 8  | 1 | 2 | 5 | 4 | 4 | 3 | 4 |
| B633 | 2008 | Zhao, Y.<br><i>et al.</i> &<br>21989209 | BSP1 | Sichuan | 30.65 | 104.08 | 2 | 3 | 1 | 2 | 1 | 5 | 1 | 8 | 3 | 4 | 2 | 3 | 4 | 2 | 4 | 9  | 9  | 6 | 2 | 5 | 4 | 4 | 3 | 4 |
| B634 | 2008 | Zhao, Y.<br><i>et al.</i> &<br>21989209 | BSP1 | Sichuan | 30.65 | 104.08 | 2 | 3 | 2 | 2 | 2 | 5 | 1 | 6 | 1 | 3 | 2 | 1 | 4 | 2 | 4 | 5  | 9  | 3 | 2 | 4 | 4 | 4 | 3 | 3 |
| B635 | 2008 | Zhao, Y.<br><i>et al.</i> &<br>21989209 | BSP1 | Sichuan | 30.65 | 104.08 | 2 | 3 | 2 | 1 | 2 | 5 | 1 | 6 | 2 | 4 | 2 | 4 | 4 | 2 | 4 | 5  | 8  | 1 | 2 | 5 | 4 | 4 | 3 | 3 |
| B636 | 2008 | Zhao, Y.<br><i>et al.</i> &<br>21989209 | BSP1 | Sichuan | 30.65 | 104.08 | 2 | 3 | 2 | 1 | 2 | 5 | 1 | 7 | 2 | 4 | 2 | 3 | 4 | 2 | 4 | ND | 5  | 2 | 2 | 4 | 4 | 4 | 3 | 3 |
| B637 | 2008 | Zhao, Y.<br><i>et al.</i> &<br>21989209 | BSP1 | Sichuan | 30.65 | 104.08 | 2 | 3 | 2 | 2 | 2 | 5 | 1 | 6 | 1 | 4 | 2 | 3 | 4 | 2 | 4 | 3  | 8  | 3 | 3 | 4 | 4 | 4 | 3 | 3 |
| B638 | 2008 | Zhao, Y.<br><i>et al.</i> &<br>21989209 | BSP1 | Sichuan | 30.65 | 104.08 | 2 | 3 | 2 | 1 | 2 | 5 | 1 | 6 | 1 | 4 | 2 | 3 | 4 | 2 | 4 | 5  | 9  | 1 | 3 | 5 | 4 | 4 | 3 | 3 |
| B639 | 2008 | Zhao, Y.<br><i>et al.</i> &<br>21989209 | BSP1 | Sichuan | 30.65 | 104.08 | 2 | 3 | 2 | 1 | 2 | 5 | 1 | 6 | 1 | 4 | 2 | 3 | 4 | 2 | 4 | 4  | 8  | 1 | 3 | 5 | 4 | 4 | 3 | 2 |
| B640 | 2008 | Zhao, Y.<br><i>et al.</i> &<br>21989209 | BSP1 | Sichuan | 30.65 | 104.08 | 2 | 3 | 2 | 1 | 2 | 5 | 1 | 7 | 1 | 4 | 2 | 3 | 4 | 2 | 4 | 6  | ND | 2 | 3 | 4 | 4 | 4 | 3 | 2 |
| B641 | 2008 | Zhao, Y.<br><i>et al.</i> &<br>21989209 | BSP1 | Sichuan | 30.65 | 104.08 | 2 | 3 | 3 | 2 | 2 | 5 | 1 | 7 | 3 | 5 | 3 | 3 | 4 | 2 | 4 | 5  | 7  | 0 | 2 | 5 | 4 | 4 | 3 | 3 |
| B642 | 2008 | Zhao, Y.<br><i>et al.</i> &<br>21989209 | BSP1 | Sichuan | 30.65 | 104.08 | 2 | 3 | 2 | 2 | 2 | 5 | 1 | 7 | 3 | 3 | 2 | 2 | 2 | 2 | 4 | 6  | 7  | 1 | 3 | 3 | 4 | 4 | 3 | 3 |
| B643 | 2008 | Zhao, Y.<br><i>et al.</i> &<br>21989209 | BSP1 | Sichuan | 30.65 | 104.08 | 2 | 3 | 2 | 2 | 2 | 5 | 1 | 8 | 3 | 4 | 2 | 2 | 4 | 2 | 4 | 5  | 7  | 1 | 2 | 3 | 4 | 4 | 3 | 3 |
| B644 | 2008 | Zhao, Y.<br><i>et al.</i> &<br>21989209 | BSP1 | Sichuan | 30.65 | 104.08 | 2 | 3 | 2 | 1 | 2 | 5 | 1 | 7 | 3 | 4 | 2 | 2 | 4 | 2 | 4 | 5  | 7  | 0 | 1 | 4 | 4 | 4 | 3 | 3 |
| B645 | 2008 | Zhao, Y.<br><i>et al.</i> &<br>21989209 | BSP1 | Sichuan | 30.65 | 104.08 | 2 | 3 | 2 | 2 | 2 | 5 | 1 | 6 | 3 | 3 | 2 | 1 | 4 | 2 | 4 | 6  | 1  | 1 | 2 | 5 | 4 | 4 | 3 | 3 |
| B646 | 2008 | Zhao, Y.<br><i>et al.</i> &<br>21989209 | BSP1 | Sichuan | 30.65 | 104.08 | 2 | 3 | 2 | 2 | 2 | 5 | 1 | 5 | 3 | 2 | 2 | 1 | 4 | 2 | 4 | 6  | 1  | 1 | 3 | 3 | 4 | 4 | 3 | 3 |
| B647 | 2008 | Zhao, Y.<br><i>et al.</i> &<br>21989209 | BSP1 | Sichuan | 30.65 | 104.08 | 2 | 3 | 2 | 1 | 2 | 5 | 1 | 6 | 3 | 3 | 2 | 3 | 3 | 2 | 4 | 4  | 7  | 0 | 3 | 5 | 4 | 2 | 3 | 3 |
| B648 | 2008 | Zhao, Y.<br><i>et al.</i> &<br>21989209 | BSP1 | Sichuan | 30.65 | 104.08 | 2 | 3 | 2 | 1 | 2 | 4 | 1 | 8 | 3 | 3 | 4 | 2 | 4 | 2 | 4 | 4  | 2  | 1 | 3 | 6 | 4 | 4 | 3 | 3 |
| B649 | 2008 | Zhao, Y.<br><i>et al.</i> &<br>21989209 | BSP1 | Sichuan | 30.65 | 104.08 | 2 | 3 | 2 | 1 | 2 | 4 | 1 | 5 | 3 | 3 | 3 | 2 | 4 | 2 | 4 | 5  | 1  | 3 | 1 | 6 | 4 | 4 | 1 | 3 |
| B650 | 2008 | Zhao, Y.<br><i>et al.</i> &<br>21989209 | BSP1 | Sichuan | 30.65 | 104.08 | 2 | 3 | 2 | 1 | 2 | 4 | 1 | 6 | 3 | 3 | 3 | 3 | 4 | 2 | 4 | 4  | 7  | 1 | 1 | 6 | 4 | 4 | 3 | 4 |
| B651 | 2008 | Zhao, Y.<br><i>et al.</i> &<br>21989209 | BSP1 | Sichuan | 30.65 | 104.08 | 2 | 3 | 2 | 1 | 2 | 4 | 1 | 6 | 3 | 3 | 3 | 3 | 4 | 2 | 4 | 5  | 7  | 3 | 2 | 4 | 4 | 4 | 2 | 3 |
| B652 | 2008 | Zhao, Y.<br><i>et al.</i> &<br>21989209 | BSP1 | Sichuan | 30.65 | 104.08 | 2 | 3 | 2 | 0 | 2 | 4 | 1 | 7 | 3 | 3 | 3 | 3 | 4 | 2 | 4 | 4  | 7  | 1 | 1 | 5 | 4 | 4 | 3 | 4 |
| B653 | 2008 | Zhao, Y.<br><i>et al.</i> &<br>21989209 | BSP1 | Sichuan | 30.65 | 104.08 | 2 | 3 | 2 | 1 | 2 | 4 | 1 | 7 | 3 | 3 | 3 | 3 | 2 | 2 | 4 | 5  | 7  | 3 | 2 | 4 | 4 | 4 | 3 | 3 |

|      |      |                            |        |         |       |        |   |   |   |   |   |   |   |   |   |   |   |   |   |   |   |    |    |   |   |   |   |   |   |   |
|------|------|----------------------------|--------|---------|-------|--------|---|---|---|---|---|---|---|---|---|---|---|---|---|---|---|----|----|---|---|---|---|---|---|---|
| B654 | 2008 | Zhao, Y. et al. & 21989209 | BSP1   | Sichuan | 30.65 | 104.08 | 2 | 3 | 2 | 1 | 2 | 4 | 1 | 7 | 3 | 4 | 3 | 3 | 4 | 2 | 4 | 4  | 8  | 1 | 1 | 5 | 4 | 4 | 3 | 4 |
| B655 | 2008 | Zhao, Y. et al. & 21989209 | BSP1   | Sichuan | 30.65 | 104.08 | 2 | 1 | 2 | 1 | 2 | 4 | 1 | 7 | 3 | 4 | 3 | 3 | 4 | 2 | 4 | 2  | 7  | 1 | 2 | 5 | 4 | 4 | 3 | 4 |
| B656 | 2008 | Zhao, Y. et al. & 21989209 | BSP1   | Sichuan | 30.65 | 104.08 | 2 | 2 | 2 | 2 | 2 | 4 | 1 | 7 | 3 | 5 | 3 | 3 | 4 | 2 | 4 | 5  | 7  | 3 | 2 | 4 | 4 | 4 | 3 | 5 |
| B657 | 2008 | Zhao, Y. et al. & 21989209 | BSP1   | Sichuan | 30.65 | 104.08 | 2 | 2 | 2 | 2 | 2 | 4 | 1 | 6 | 3 | 3 | 3 | 3 | 4 | 2 | 4 | 4  | 7  | 1 | 1 | 5 | 4 | 4 | 3 | 4 |
| B658 | 2008 | Zhao, Y. et al. & 21989209 | BSP1   | Sichuan | 30.65 | 104.08 | 2 | 3 | 2 | 4 | 2 | 5 | 1 | 6 | 3 | 4 | 3 | 3 | 4 | 2 | 4 | 4  | 7  | 1 | 1 | 7 | 4 | 4 | 3 | 4 |
| B659 | 2008 | Zhao, Y. et al. & 21989209 | BSP1   | Sichuan | 30.65 | 104.08 | 2 | 3 | 3 | 3 | 2 | 5 | 1 | 6 | 2 | 3 | 3 | 2 | 4 | 2 | 4 | 5  | 7  | 3 | 3 | 4 | 4 | 4 | 3 | 4 |
| B660 | 2008 | Zhao, Y. et al. & 21989209 | BSP1   | Sichuan | 30.65 | 104.08 | 2 | 3 | 3 | 3 | 2 | 5 | 1 | 6 | 3 | 3 | 3 | 3 | 3 | 2 | 4 | 4  | 6  | 1 | 2 | 5 | 4 | 2 | 3 | 4 |
| B661 | 2008 | Zhao, Y. et al. & 21989209 | BSP5   | Sichuan | 30.65 | 104.08 | 2 | 2 | 3 | 3 | 2 | 5 | 1 | 7 | 3 | 4 | 3 | 3 | 4 | 2 | 4 | 4  | 7  | 2 | 4 | 5 | 4 | 4 | 3 | 3 |
| B662 | 2008 | Zhao, Y. et al. & 21989209 | BSP5   | Sichuan | 30.65 | 104.08 | 2 | 2 | 4 | 3 | 2 | 5 | 1 | 7 | 3 | 5 | 4 | 3 | 3 | 2 | 4 | 4  | 6  | 2 | 4 | 6 | 4 | 2 | 3 | 3 |
| B663 | 2008 | Zhao, Y. et al. & 21989209 | BSPint | Sichuan | 30.65 | 104.08 | 2 | 2 | 3 | 3 | 2 | 5 | 1 | 6 | 3 | 5 | 4 | 3 | 4 | 2 | 4 | 5  | 7  | 7 | 3 | 3 | 4 | 4 | 3 | 3 |
| B664 | 2008 | Zhao, Y. et al. & 21989209 | BSP1   | Sichuan | 30.65 | 104.08 | 2 | 2 | 2 | 3 | 2 | 5 | 1 | 6 | 3 | 4 | 3 | 3 | 4 | 2 | 4 | 5  | 7  | 5 | 1 | 6 | 4 | 4 | 3 | 2 |
| B665 | 2008 | Zhao, Y. et al. & 21989209 | BSP1   | Sichuan | 30.65 | 104.08 | 2 | 2 | 3 | 4 | 2 | 5 | 1 | 8 | 4 | 6 | 5 | 3 | 4 | 2 | 4 | 4  | 7  | 2 | 2 | 5 | 6 | 4 | 3 | 3 |
| B666 | 2008 | Zhao, Y. et al. & 21989209 | BSP1   | Sichuan | 30.65 | 104.08 | 2 | 3 | 3 | 3 | 1 | 5 | 1 | 7 | 2 | 4 | 4 | 3 | 4 | 2 | 4 | 2  | 8  | 1 | 4 | 6 | 4 | 4 | 3 | 4 |
| B667 | 2008 | Zhao, Y. et al. & 21989209 | BSP1   | Sichuan | 30.65 | 104.08 | 2 | 3 | 3 | 3 | 2 | 5 | 1 | 7 | 2 | 4 | 4 | 3 | 3 | 2 | 4 | 4  | 8  | 1 | 4 | 6 | 4 | 4 | 2 | 3 |
| B668 | 2008 | Zhao, Y. et al. & 21989209 | BSP1   | Sichuan | 30.65 | 104.08 | 2 | 3 | 3 | 3 | 2 | 5 | 1 | 7 | 2 | 4 | 4 | 3 | 4 | 2 | 4 | 6  | 8  | 2 | 4 | 4 | 4 | 4 | 2 | 4 |
| B669 | 2009 | Zhao, Y. et al. & 21989209 | BSP1   | Sichuan | 30.65 | 104.08 | 2 | 3 | 3 | 3 | 2 | 5 | 1 | 6 | 3 | 3 | 4 | 2 | 4 | 2 | 4 | 5  | 7  | 1 | 2 | 5 | 4 | 4 | 3 | 4 |
| B670 | 2009 | Zhao, Y. et al. & 21989209 | BSP1   | Sichuan | 30.65 | 104.08 | 2 | 3 | 2 | 2 | 2 | 5 | 1 | 7 | 3 | 4 | 3 | 3 | 4 | 2 | 4 | 5  | 7  | 2 | 4 | 4 | 4 | 4 | 3 | 4 |
| B671 | 2009 | Zhao, Y. et al. & 21989209 | BSP1   | Sichuan | 30.65 | 104.08 | 2 | 3 | 2 | 2 | 2 | 5 | 1 | 5 | 2 | 5 | 2 | 3 | 4 | 2 | 4 | 6  | 8  | 3 | 3 | 4 | 4 | 4 | 3 | 5 |
| B672 | 2009 | Zhao, Y. et al. & 21989209 | BSP1   | Sichuan | 30.65 | 104.08 | 2 | 1 | 2 | 2 | 2 | 5 | 1 | 6 | 1 | 4 | 1 | 3 | 4 | 2 | 4 | 9  | 8  | 1 | 1 | 4 | 4 | 4 | 3 | 4 |
| B673 | 2009 | Zhao, Y. et al. & 21989209 | BSP1   | Sichuan | 30.65 | 104.08 | 2 | 3 | 1 | 2 | 2 | 5 | 1 | 6 | 1 | 5 | 1 | 3 | 4 | 2 | 4 | 8  | 8  | 1 | 1 | 4 | 4 | 4 | 3 | 4 |
| B674 | 2009 | Zhao, Y. et al. & 21989209 | BSP1   | Sichuan | 30.65 | 104.08 | 2 | 3 | 2 | 2 | 2 | 5 | 1 | 4 | 1 | 4 | 1 | 3 | 4 | 2 | 4 | ND | 9  | 1 | 1 | 3 | 4 | 4 | 3 | 3 |
| B675 | 2009 | Zhao, Y. et al. & 21989209 | BSP1   | Sichuan | 30.65 | 104.08 | 2 | 3 | 2 | 2 | 2 | 5 | 1 | 6 | 1 | 4 | 1 | 3 | 4 | 2 | 4 | ND | 8  | 1 | 1 | 4 | 4 | 4 | 3 | 4 |
| B676 | 2009 | Zhao, Y. et al. & 21989209 | BSP1   | Sichuan | 30.65 | 104.08 | 2 | 3 | 2 | 2 | 2 | 5 | 1 | 6 | 1 | 5 | 1 | 3 | 4 | 2 | 4 | 9  | 8  | 1 | 1 | 4 | 4 | 4 | 3 | 4 |
| B677 | 2009 | Zhao, Y. et al. & 21989209 | BSP1   | Sichuan | 30.65 | 104.08 | 2 | 3 | 2 | 2 | 2 | 5 | 1 | 5 | 1 | 4 | 1 | 3 | 4 | 2 | 4 | 7  | 9  | 1 | 1 | 6 | 4 | 4 | 3 | 3 |
| B678 | 2009 | Zhao, Y. et al. & 21989209 | BSP1   | Sichuan | 30.65 | 104.08 | 2 | 3 | 2 | 2 | 2 | 5 | 1 | 5 | 2 | 2 | 2 | 1 | 4 | 2 | 4 | 6  | 2  | 4 | 2 | 4 | 4 | 4 | 2 | 4 |
| B679 | 2009 | Zhao, Y. et al. & 21989209 | BSP1   | Sichuan | 30.65 | 104.08 | 2 | 3 | 3 | 2 | 2 | 5 | 1 | 6 | 3 | 5 | 4 | 3 | 4 | 2 | 4 | 5  | 9  | 1 | 2 | 3 | 4 | 4 | 3 | 4 |
| B680 | 2009 | Zhao, Y. et al. & 21989209 | BSP1   | Sichuan | 30.65 | 104.08 | 2 | 3 | 3 | 2 | 2 | 5 | 1 | 6 | 3 | 5 | 3 | 3 | 4 | 2 | 4 | 6  | ND | 2 | 3 | 3 | 4 | 4 | 3 | 4 |
| B681 | 2009 | Zhao, Y. et al. & 21989209 | BSP1   | Sichuan | 30.65 | 104.08 | 2 | 3 | 3 | 2 | 2 | 5 | 1 | 5 | 3 | 4 | 4 | 2 | 4 | 2 | 4 | 4  | 8  | 2 | 3 | 4 | 4 | 4 | 3 | 4 |
| B682 | 2009 | Zhao, Y. et al. & 21989209 | BSP1   | Sichuan | 30.65 | 104.08 | 2 | 3 | 1 | 2 | 2 | 5 | 1 | 6 | 3 | 4 | 4 | 3 | 3 | 2 | 4 | 3  | 8  | 2 | 3 | 3 | 4 | 3 | 3 | 4 |
| B683 | 2009 | Zhao, Y. et al. & 21989209 | BSP1   | Sichuan | 30.65 | 104.08 | 2 | 4 | 3 | 3 | 2 | 5 | 1 | 6 | 3 | 5 | 4 | 3 | 4 | 2 | 4 | 5  | 7  | 1 | 3 | 5 | 4 | 4 | 3 | 4 |
| B684 | 2009 | Zhao, Y. et al. & 21989209 | BSP1   | Sichuan | 30.65 | 104.08 | 2 | 3 | 3 | 2 | 2 | 5 | 1 | 6 | 3 | 4 | 3 | 3 | 4 | 2 | 4 | 3  | 8  | 1 | 2 | 5 | 4 | 4 | 3 | 4 |
| B685 | 2009 | Zhao, Y. et al. & 21989209 | BSP1   | Sichuan | 30.65 | 104.08 | 2 | 3 | 2 | 2 | 2 | 5 | 1 | 6 | 3 | 5 | 4 | 3 | 4 | 2 | 4 | 5  | 9  | 1 | 2 | 3 | 4 | 4 | 3 | 4 |
| B686 | 2009 | Zhao, Y. et al. & 21989209 | BSP1   | Sichuan | 30.65 | 104.08 | 2 | 3 | 3 | 2 | 2 | 5 | 1 | 6 | 3 | 4 | 4 | 3 | 4 | 2 | 4 | 5  | 9  | 1 | 3 | 3 | 4 | 4 | 3 | 4 |
| B687 | 2009 | Zhao, Y. et al. & 21989209 | BSP1   | Sichuan | 30.65 | 104.08 | 2 | 3 | 3 | 2 | 2 | 5 | 1 | 7 | 4 | 4 | 3 | 3 | 4 | 2 | 5 | 2  | 5  | 2 | 3 | 4 | 4 | 4 | 3 | 5 |
| B688 | 2009 | Zhao, Y. et al. & 21989209 | BSP1   | Sichuan | 30.65 | 104.08 | 2 | 3 | 3 | 2 | 2 | 5 | 1 | 4 | 3 | 4 | 3 | 3 | 3 | 2 | 4 | 5  | 7  | 1 | 3 | 5 | 4 | 4 | 3 | 4 |
| B689 | 2009 | Zhao, Y. et al. & 21989209 | BSP1   | Sichuan | 30.65 | 104.08 | 2 | 3 | 3 | 2 | 2 | 5 | 1 | 6 | 3 | 4 | 3 | 3 | 4 | 2 | 5 | 5  | 7  | 1 | 3 | 5 | 4 | 4 | 3 | 4 |
| B690 | 2009 | Zhao, Y. et al. & 21989209 | BSP1   | Sichuan | 30.65 | 104.08 | 2 | 3 | 3 | 2 | 2 | 5 | 1 | 6 | 3 | 4 | 3 | 3 | 2 | 2 | 4 | 4  | 7  | 2 | 3 | 4 | 4 | 4 | 3 | 4 |
| B691 | 2009 | Zhao, Y. et al. & 21989209 | BSP1   | Sichuan | 30.65 | 104.08 | 2 | 3 | 3 | 2 | 2 | 5 | 1 | 7 | 3 | 4 | 3 | 3 | 4 | 2 | 4 | 5  | 7  | 1 | 3 | 5 | 4 | 4 | 3 | 4 |
| B692 | 2009 | Zhao, Y. et al. & 21989209 | BSP1   | Sichuan | 30.65 | 104.08 | 2 | 3 | 3 | 2 | 2 | 5 | 1 | 7 | 3 | 4 | 3 | 3 | 4 | 2 | 4 | 5  | 5  | 1 | 3 | 5 | 4 | 4 | 3 | 4 |
| B693 | 2009 | Zhao, Y. et al. & 21989209 | BSP1   | Sichuan | 30.65 | 104.08 | 2 | 3 | 3 | 3 | 2 | 5 | 1 | 6 | 3 | 4 | 3 | 4 | 4 | 2 | 4 | 6  | 8  | 3 | 3 | 5 | 4 | 4 | 3 | 6 |
| B694 | 2009 | Zhao, Y. et al. & 21989209 | BSP1   | Sichuan | 30.65 | 104.08 | 2 | 3 | 3 | 3 | 2 | 5 | 1 | 6 | 3 | 4 | 2 | 3 | 4 | 2 | 4 | 5  | 8  | 1 | 3 | 5 | 4 | 4 | 3 | 5 |

|      |      |                                         |      |         |       |        |   |   |   |   |   |   |   |   |   |   |   |   |   |   |   |   |   |   |   |   |   |   |   |   |
|------|------|-----------------------------------------|------|---------|-------|--------|---|---|---|---|---|---|---|---|---|---|---|---|---|---|---|---|---|---|---|---|---|---|---|---|
| B695 | 2009 | Zhao, Y.<br><i>et al.</i> &<br>21989209 | BSP1 | Sichuan | 30.65 | 104.08 | 2 | 3 | 3 | 3 | 2 | 5 | 1 | 6 | 3 | 4 | 2 | 3 | 4 | 2 | 4 | 5 | 6 | 1 | 3 | 5 | 4 | 4 | 3 | 4 |
| B696 | 2009 | Zhao, Y.<br><i>et al.</i> &<br>21989209 | BSP1 | Sichuan | 30.65 | 104.08 | 2 | 3 | 3 | 3 | 2 | 5 | 1 | 6 | 3 | 4 | 2 | 3 | 4 | 2 | 4 | 5 | 6 | 1 | 3 | 5 | 4 | 4 | 3 | 4 |
| B697 | 2009 | Zhao, Y.<br><i>et al.</i> &<br>21989209 | BSP1 | Sichuan | 30.65 | 104.08 | 2 | 3 | 4 | 3 | 2 | 5 | 1 | 7 | 3 | 5 | 4 | 3 | 5 | 2 | 4 | 6 | 8 | 1 | 4 | 6 | 4 | 4 | 3 | 4 |
| B698 | 2009 | Zhao, Y.<br><i>et al.</i> &<br>21989209 | BSP1 | Sichuan | 30.65 | 104.08 | 2 | 3 | 3 | 3 | 2 | 5 | 1 | 7 | 3 | 4 | 4 | 3 | 5 | 2 | 4 | 6 | 9 | 2 | 8 | 3 | 4 | 4 | 3 | 4 |
| B699 | 2009 | Zhao, Y.<br><i>et al.</i> &<br>21989209 | BSP1 | Sichuan | 30.65 | 104.08 | 2 | 3 | 3 | 3 | 2 | 5 | 1 | 8 | 3 | 4 | 4 | 3 | 3 | 2 | 4 | 5 | 7 | 1 | 2 | 5 | 4 | 4 | 3 | 4 |
| B700 | 2009 | Zhao, Y.<br><i>et al.</i> &<br>21989209 | BSP1 | Sichuan | 30.65 | 104.08 | 2 | 3 | 3 | 3 | 2 | 5 | 1 | 6 | 3 | 4 | 4 | 3 | 4 | 2 | 3 | 5 | 5 | 1 | 2 | 7 | 4 | 2 | 3 | 4 |
| B701 | 2009 | Zhao, Y.<br><i>et al.</i> &<br>21989209 | BSP1 | Sichuan | 30.65 | 104.08 | 2 | 3 | 3 | 4 | 2 | 5 | 1 | 6 | 3 | 3 | 3 | 3 | 3 | 2 | 4 | 5 | 7 | 1 | 2 | 5 | 4 | 4 | 3 | 4 |
| B702 | 2009 | Zhao, Y.<br><i>et al.</i> &<br>21989209 | BSP1 | Sichuan | 30.65 | 104.08 | 2 | 3 | 3 | 4 | 2 | 5 | 1 | 7 | 3 | 4 | 5 | 3 | 4 | 2 | 4 | 5 | 6 | 2 | 3 | 4 | 4 | 4 | 3 | 3 |
| B703 | 2009 | Zhao, Y.<br><i>et al.</i> &<br>21989209 | BSP1 | Sichuan | 30.65 | 104.08 | 2 | 3 | 2 | 4 | 2 | 5 | 1 | 6 | 3 | 3 | 3 | 3 | 4 | 2 | 4 | 5 | 7 | 1 | 3 | 4 | 4 | 4 | 3 | 3 |
| B704 | 2009 | Zhao, Y.<br><i>et al.</i> &<br>21989209 | BSP1 | Sichuan | 30.65 | 104.08 | 2 | 3 | 2 | 3 | 2 | 5 | 1 | 6 | 3 | 3 | 3 | 3 | 4 | 2 | 4 | 4 | 7 | 2 | 3 | 3 | 4 | 4 | 3 | 4 |
| B705 | 2009 | Zhao, Y.<br><i>et al.</i> &<br>21989209 | BSP1 | Sichuan | 30.65 | 104.08 | 2 | 3 | 2 | 4 | 2 | 5 | 1 | 6 | 3 | 3 | 3 | 3 | 3 | 2 | 4 | 5 | 7 | 2 | 3 | 4 | 4 | 4 | 3 | 3 |
| B706 | 2009 | Zhao, Y.<br><i>et al.</i> &<br>21989209 | BSP1 | Sichuan | 30.65 | 104.08 | 2 | 1 | 3 | 3 | 2 | 5 | 1 | 6 | 3 | 3 | 3 | 3 | 4 | 2 | 4 | 4 | 6 | 1 | 3 | 4 | 4 | 4 | 3 | 3 |
| B707 | 2009 | Zhao, Y.<br><i>et al.</i> &<br>21989209 | BSP1 | Sichuan | 30.65 | 104.08 | 2 | 3 | 3 | 4 | 2 | 5 | 1 | 6 | 3 | 3 | 3 | 3 | 4 | 2 | 5 | 5 | 7 | 1 | 3 | 4 | 4 | 4 | 3 | 3 |
| B708 | 2009 | Zhao, Y.<br><i>et al.</i> &<br>21989209 | BSP1 | Sichuan | 30.65 | 104.08 | 2 | 3 | 2 | 3 | 2 | 6 | 1 | 6 | 3 | 1 | 3 | 2 | 4 | 2 | 4 | 7 | 2 | 5 | 3 | 3 | 4 | 4 | 3 | 3 |
| B709 | 2009 | Zhao, Y.<br><i>et al.</i> &<br>21989209 | BSP1 | Sichuan | 30.65 | 104.08 | 2 | 3 | 2 | 3 | 2 | 5 | 1 | 7 | 3 | 3 | 3 | 4 | 3 | 2 | 4 | 4 | 7 | 1 | 4 | 5 | 4 | 2 | 3 | 2 |
| B710 | 2009 | Zhao, Y.<br><i>et al.</i> &<br>21989209 | BSP1 | Sichuan | 30.65 | 104.08 | 2 | 3 | 2 | 2 | 2 | 5 | 1 | 7 | 2 | 4 | 2 | 3 | 4 | 2 | 4 | 3 | 7 | 1 | 2 | 5 | 4 | 4 | 2 | 4 |
| B711 | 2009 | Zhao, Y.<br><i>et al.</i> &<br>21989209 | BSP1 | Sichuan | 30.65 | 104.08 | 2 | 3 | 2 | 2 | 2 | 5 | 1 | 7 | 1 | 6 | 2 | 3 | 4 | 2 | 5 | 3 | 5 | 3 | 2 | 4 | 4 | 4 | 3 | 5 |
| B712 | 2009 | Zhao, Y.<br><i>et al.</i> &<br>21989209 | BSP1 | Sichuan | 30.65 | 104.08 | 2 | 3 | 2 | 2 | 2 | 5 | 1 | 6 | 2 | 5 | 1 | 3 | 4 | 2 | 3 | 8 | 7 | 2 | 1 | 4 | 4 | 4 | 3 | 4 |
| B713 | 2009 | Zhao, Y.<br><i>et al.</i> &<br>21989209 | BSP1 | Sichuan | 30.65 | 104.08 | 2 | 3 | 1 | 2 | 2 | 5 | 1 | 5 | 1 | 4 | 1 | 2 | 4 | 1 | 4 | 9 | 9 | 1 | 1 | 4 | 4 | 4 | 3 | 4 |
| B714 | 2009 | Zhao, Y.<br><i>et al.</i> &<br>21989209 | BSP1 | Sichuan | 30.65 | 104.08 | 2 | 3 | 2 | 2 | 2 | 5 | 1 | 6 | 1 | 4 | 1 | 3 | 3 | 2 | 4 | 6 | 7 | 1 | 2 | 4 | 4 | 4 | 3 | 4 |
| B715 | 2009 | Zhao, Y.<br><i>et al.</i> &<br>21989209 | BSP1 | Sichuan | 30.65 | 104.08 | 2 | 3 | 2 | 2 | 2 | 5 | 1 | 6 | 1 | 4 | 1 | 3 | 4 | 3 | 4 | 6 | 8 | 1 | 2 | 5 | 4 | 4 | 3 | 4 |
| B716 | 2009 | Zhao, Y.<br><i>et al.</i> &<br>21989209 | BSP1 | Sichuan | 30.65 | 104.08 | 2 | 3 | 2 | 2 | 2 | 5 | 1 | 6 | 2 | 3 | 2 | 2 | 4 | 2 | 4 | 6 | 7 | 3 | 1 | 4 | 4 | 4 | 3 | 4 |
| B717 | 2009 | Zhao, Y.<br><i>et al.</i> &<br>21989209 | BSP1 | Sichuan | 30.65 | 104.08 | 2 | 3 | 2 | 2 | 2 | 5 | 1 | 4 | 2 | 3 | 3 | 2 | 4 | 2 | 4 | 6 | 9 | 1 | 4 | 4 | 4 | 4 | 3 | 3 |
| B718 | 2009 | Zhao, Y.<br><i>et al.</i> &<br>21989209 | BSP1 | Sichuan | 30.65 | 104.08 | 2 | 3 | 3 | 3 | 2 | 5 | 1 | 7 | 3 | 5 | 4 | 3 | 3 | 2 | 4 | 4 | 7 | 1 | 4 | 6 | 4 | 2 | 3 | 4 |
| B719 | 2009 | Zhao, Y.<br><i>et al.</i> &<br>21989209 | BSP1 | Sichuan | 30.65 | 104.08 | 2 | 3 | 3 | 2 | 2 | 5 | 1 | 6 | 3 | 4 | 4 | 3 | 4 | 2 | 4 | 5 | 3 | 1 | 3 | 5 | 4 | 4 | 3 | 4 |
| B720 | 2009 | Zhao, Y.<br><i>et al.</i> &<br>21989209 | BSP1 | Sichuan | 30.65 | 104.08 | 2 | 3 | 3 | 2 | 2 | 5 | 1 | 7 | 3 | 4 | 3 | 3 | 4 | 2 | 4 | 5 | 7 | 1 | 3 | 5 | 4 | 4 | 3 | 4 |
| B721 | 2009 | Zhao, Y.<br><i>et al.</i> &<br>21989209 | BSP1 | Sichuan | 30.65 | 104.08 | 2 | 3 | 3 | 2 | 2 | 5 | 1 | 5 | 3 | 4 | 4 | 4 | 4 | 2 | 4 | 6 | 9 | 1 | 3 | 4 | 4 | 4 | 3 | 4 |
| B722 | 2009 | Zhao, Y.<br><i>et al.</i> &<br>21989209 | BSP1 | Sichuan | 30.65 | 104.08 | 2 | 3 | 3 | 3 | 2 | 5 | 1 | 6 | 3 | 4 | 3 | 3 | 4 | 2 | 4 | 4 | 8 | 1 | 3 | 5 | 4 | 4 | 3 | 5 |
| B723 | 2009 | Zhao, Y.<br><i>et al.</i> &<br>21989209 | BSP1 | Sichuan | 30.65 | 104.08 | 2 | 3 | 3 | 3 | 2 | 5 | 1 | 6 | 3 | 4 | 3 | 3 | 4 | 2 | 4 | 6 | 8 | 3 | 3 | 4 | 4 | 4 | 3 | 5 |
| B724 | 2009 | Zhao, Y.<br><i>et al.</i> &<br>21989209 | BSP1 | Sichuan | 30.65 | 104.08 | 2 | 3 | 3 | 3 | 2 | 5 | 1 | 6 | 3 | 3 | 3 | 3 | 4 | 2 | 4 | 4 | 8 | 1 | 3 | 5 | 4 | 4 | 3 | 5 |
| B725 | 2009 | Zhao, Y.<br><i>et al.</i> &<br>21989209 | BSP1 | Sichuan | 30.65 | 104.08 | 2 | 3 | 3 | 3 | 2 | 5 | 1 | 4 | 3 | 4 | 3 | 3 | 4 | 2 | 4 | 5 | 9 | 1 | 3 | 4 | 4 | 4 | 3 | 5 |
| B726 | 2009 | Zhao, Y.<br><i>et al.</i> &<br>21989209 | BSP1 | Sichuan | 30.65 | 104.08 | 2 | 3 | 3 | 3 | 2 | 5 | 1 | 6 | 3 | 3 | 3 | 3 | 4 | 2 | 4 | 3 | 6 | 2 | 2 | 4 | 4 | 4 | 3 | 5 |
| B727 | 2009 | Zhao, Y.<br><i>et al.</i> &<br>21989209 | BSP1 | Sichuan | 30.65 | 104.08 | 2 | 3 | 3 | 3 | 2 | 5 | 1 | 6 | 3 | 4 | 3 | 4 | 3 | 2 | 4 | 3 | 7 | 1 | 1 | 5 | 4 | 4 | 3 | 5 |
| B728 | 2009 | Zhao, Y.<br><i>et al.</i> &<br>21989209 | BSP1 | Sichuan | 30.65 | 104.08 | 2 | 3 | 3 | 3 | 2 | 5 | 1 | 6 | 3 | 4 | 4 | 3 | 4 | 2 | 4 | 5 | 3 | 1 | 3 | 5 | 4 | 4 | 3 | 5 |
| B729 | 2009 | Zhao, Y.<br><i>et al.</i> &<br>21989209 | BSP1 | Sichuan | 30.65 | 104.08 | 2 | 3 | 3 | 3 | 2 | 5 | 1 | 4 | 3 | 4 | 3 | 3 | 4 | 2 | 4 | 5 | 9 | 1 | 4 | 4 | 4 | 4 | 2 | 4 |
| B730 | 2009 | Zhao, Y.<br><i>et al.</i> &<br>21989209 | BSP1 | Sichuan | 30.65 | 104.08 | 2 | 3 | 3 | 3 | 2 | 5 | 1 | 4 | 3 | 4 | 3 | 3 | 4 | 2 | 4 | 5 | 9 | 1 | 4 | 4 | 4 | 4 | 2 | 4 |
| B731 | 2009 | Zhao, Y.<br><i>et al.</i> &<br>21989209 | BSP1 | Sichuan | 30.65 | 104.08 | 2 | 3 | 3 | 3 | 2 | 5 | 1 | 6 | 3 | 4 | 2 | 3 | 4 | 2 | 4 | 3 | 6 | 1 | 3 | 5 | 4 | 4 | 3 | 5 |
| B732 | 2009 | Zhao, Y.<br><i>et al.</i> &<br>21989209 | BSP1 | Sichuan | 30.65 | 104.08 | 2 | 3 | 3 | 3 | 2 | 5 | 1 | 8 | 3 | 4 | 5 | 3 | 4 | 2 | 4 | 5 | 6 | 3 | 3 | 4 | 4 | 4 | 3 | 4 |
| B733 | 2009 | Zhao, Y.<br><i>et al.</i> &<br>21989209 | BSP1 | Sichuan | 30.65 | 104.08 | 2 | 3 | 3 | 3 | 2 | 5 | 1 | 6 | 3 | 4 | 2 | 3 | 4 | 2 | 4 | 5 | 6 | 1 | 3 | 5 | 4 | 4 | 3 | 5 |
| B734 | 2009 | Zhao, Y.<br><i>et al.</i> &<br>21989209 | BSP1 | Sichuan | 30.65 | 104.08 | 2 | 3 | 3 | 3 | 2 | 6 | 1 | 5 | 3 | 4 | 3 | 3 | 4 | 2 | 3 | 5 | 8 | 2 | 2 | 5 | 4 | 4 | 3 | 5 |
| B735 | 2009 | Zhao, Y.<br><i>et al.</i> &<br>21989209 | BSP1 | Sichuan | 30.65 | 104.08 | 2 | 3 | 3 | 3 | 2 | 5 | 1 | 6 | 3 | 4 | 2 | 3 | 4 | 2 | 4 | 5 | 7 | 1 | 3 | 4 | 4 | 4 | 3 | 4 |

|      |      |                                         |        |         |       |        |   |   |   |   |   |   |   |   |   |   |   |   |   |   |   |    |   |   |   |   |   |   |   |   |
|------|------|-----------------------------------------|--------|---------|-------|--------|---|---|---|---|---|---|---|---|---|---|---|---|---|---|---|----|---|---|---|---|---|---|---|---|
| B736 | 2009 | Zhao, Y.<br><i>et al.</i> &<br>21989209 | BSP1   | Sichuan | 30.65 | 104.08 | 2 | 3 | 4 | 3 | 2 | 5 | 1 | 8 | 3 | 4 | 4 | 3 | 5 | 2 | 4 | 4  | 8 | 1 | 4 | 6 | 4 | 4 | 3 | 4 |
| B737 | 2009 | Zhao, Y.<br><i>et al.</i> &<br>21989209 | BSP1   | Sichuan | 30.65 | 104.08 | 2 | 3 | 4 | 3 | 2 | 5 | 1 | 8 | 3 | 5 | 4 | 3 | 3 | 2 | 4 | 4  | 8 | 1 | 4 | 6 | 4 | 2 | 3 | 4 |
| B738 | 2009 | Zhao, Y.<br><i>et al.</i> &<br>21989209 | BSP1   | Sichuan | 30.65 | 104.08 | 2 | 3 | 5 | 3 | 2 | 5 | 1 | 7 | 3 | 4 | 4 | 3 | 5 | 2 | 4 | 4  | 8 | 1 | 4 | 9 | 4 | 4 | 3 | 4 |
| B739 | 2009 | Zhao, Y.<br><i>et al.</i> &<br>21989209 | BSP1   | Sichuan | 30.65 | 104.08 | 2 | 3 | 4 | 3 | 2 | 5 | 1 | 7 | 3 | 4 | 4 | 3 | 4 | 2 | 4 | 4  | 8 | 1 | 2 | 6 | 4 | 4 | 2 | 4 |
| B740 | 2009 | Zhao, Y.<br><i>et al.</i> &<br>21989209 | BSP1   | Sichuan | 30.65 | 104.08 | 2 | 3 | 4 | 3 | 2 | 5 | 1 | 6 | 3 | 4 | 4 | 3 | 5 | 2 | 4 | 6  | 8 | 2 | 4 | 6 | 2 | 4 | 3 | 4 |
| B741 | 2009 | Zhao, Y.<br><i>et al.</i> &<br>21989209 | BSP1   | Sichuan | 30.65 | 104.08 | 2 | 2 | 4 | 4 | 2 | 5 | 1 | 7 | 3 | 4 | 4 | 3 | 5 | 2 | 4 | 6  | 8 | 1 | 2 | 7 | 4 | 4 | 3 | 4 |
| B742 | 2009 | Zhao, Y.<br><i>et al.</i> &<br>21989209 | BSP1   | Sichuan | 30.65 | 104.08 | 2 | 3 | 3 | 3 | 2 | 5 | 1 | 7 | 3 | 4 | 3 | 3 | 4 | 2 | 4 | 2  | 8 | 1 | 4 | 6 | 4 | 4 | 3 | 4 |
| B743 | 2009 | Zhao, Y.<br><i>et al.</i> &<br>21989209 | BSPint | Sichuan | 30.65 | 104.08 | 2 | 3 | 3 | 3 | 1 | 5 | 1 | 7 | 3 | 4 | 3 | 3 | 4 | 3 | 4 | 4  | 7 | 3 | 4 | 3 | 4 | 4 | 3 | 4 |
| B744 | 2009 | Zhao, Y.<br><i>et al.</i> &<br>21989209 | BSP1   | Sichuan | 30.65 | 104.08 | 2 | 3 | 2 | 3 | 2 | 5 | 1 | 6 | 3 | 5 | 4 | 3 | 4 | 2 | 4 | 5  | 8 | 1 | 4 | 6 | 4 | 4 | 3 | 4 |
| B745 | 2009 | Zhao, Y.<br><i>et al.</i> &<br>21989209 | BSP1   | Sichuan | 30.65 | 104.08 | 2 | 3 | 3 | 3 | 2 | 5 | 1 | 7 | 3 | 4 | 4 | 3 | 4 | 2 | 4 | 5  | 9 | 1 | 4 | 6 | 4 | 4 | 3 | 4 |
| B746 | 2009 | Zhao, Y.<br><i>et al.</i> &<br>21989209 | BSP1   | Sichuan | 30.65 | 104.08 | 2 | 3 | 3 | 3 | 2 | 5 | 1 | 5 | 3 | 4 | 5 | 2 | 4 | 2 | 4 | 4  | 5 | 1 | 4 | 4 | 4 | 4 | 3 | 4 |
| B747 | 2009 | Zhao, Y.<br><i>et al.</i> &<br>21989209 | BSP1   | Sichuan | 30.65 | 104.08 | 2 | 3 | 3 | 3 | 2 | 5 | 1 | 7 | 3 | 1 | 4 | 3 | 4 | 2 | 4 | 5  | 8 | 1 | 4 | 5 | 4 | 3 | 3 | 4 |
| B748 | 2009 | Zhao, Y.<br><i>et al.</i> &<br>21989209 | BSP1   | Sichuan | 30.65 | 104.08 | 2 | 3 | 3 | 3 | 2 | 5 | 1 | 7 | 3 | 4 | 4 | 3 | 4 | 2 | 4 | 5  | 8 | 1 | 4 | 5 | 4 | 4 | 3 | 4 |
| B749 | 2009 | Zhao, Y.<br><i>et al.</i> &<br>21989209 | BSP1   | Sichuan | 30.65 | 104.08 | 2 | 3 | 3 | 3 | 2 | 5 | 1 | 7 | 3 | 2 | 4 | 3 | 4 | 2 | 4 | 4  | 8 | 1 | 3 | 8 | 4 | 4 | 3 | 3 |
| B750 | 2010 | This<br>study                           | BSP1   | Sichuan | 30.65 | 104.08 | 2 | 3 | 0 | 3 | 1 | 5 | 1 | 6 | 2 | 3 | 2 | 3 | 4 | 2 | 4 | 5  | 7 | 2 | 3 | 5 | 4 | 4 | 3 | 4 |
| B751 | 2010 | This<br>study                           | BSP1   | Sichuan | 30.65 | 104.08 | 2 | 3 | 1 | 3 | 1 | 5 | 1 | 6 | 2 | 3 | 2 | 3 | 4 | 2 | 4 | 2  | 7 | 2 | 3 | 7 | 4 | 2 | 3 | 4 |
| B752 | 2010 | This<br>study                           | BSP1   | Sichuan | 30.65 | 104.08 | 2 | 3 | 1 | 3 | 1 | 5 | 1 | 7 | 2 | 3 | 2 | 3 | 4 | 2 | 4 | 5  | 6 | 3 | 3 | 4 | 4 | 4 | 3 | 4 |
| B753 | 2010 | This<br>study                           | BSP1   | Sichuan | 30.65 | 104.08 | 2 | 3 | 1 | 3 | 1 | 5 | 1 | 8 | 2 | 3 | 2 | 3 | 4 | 2 | 4 | 4  | 7 | 2 | 3 | 4 | 4 | 2 | 3 | 4 |
| B754 | 2010 | This<br>study                           | BSP1   | Sichuan | 30.65 | 104.08 | 2 | 3 | 1 | 3 | 1 | 5 | 1 | 7 | 2 | 2 | 2 | 3 | 4 | 2 | 4 | 4  | 7 | 2 | 3 | 4 | 4 | 2 | 3 | 4 |
| B755 | 2010 | This<br>study                           | BSP1   | Sichuan | 30.65 | 104.08 | 2 | 3 | 1 | 3 | 1 | 5 | 1 | 7 | 2 | 3 | 2 | 3 | 3 | 2 | 4 | 4  | 7 | 2 | 3 | 4 | 4 | 3 | 3 | 4 |
| B756 | 2010 | This<br>study                           | BSP1   | Sichuan | 30.65 | 104.08 | 2 | 3 | 1 | 3 | 1 | 5 | 1 | 7 | 2 | 3 | 2 | 2 | 4 | 2 | 4 | 6  | 8 | 3 | 2 | 3 | 4 | 4 | 3 | 4 |
| B757 | 2010 | This<br>study                           | BSP1   | Sichuan | 30.65 | 104.08 | 2 | 3 | 1 | 3 | 1 | 5 | 1 | 5 | 2 | 3 | 2 | 2 | 4 | 2 | 4 | 5  | 7 | 1 | 3 | 3 | 4 | 2 | 3 | 4 |
| B758 | 2010 | This<br>study                           | BSP1   | Sichuan | 30.65 | 104.08 | 2 | 3 | 1 | 3 | 1 | 5 | 1 | 6 | 2 | 2 | 2 | 2 | 4 | 2 | 4 | ND | 4 | 2 | 3 | 3 | 4 | 4 | 3 | 6 |
| B759 | 2010 | This<br>study                           | BSP1   | Sichuan | 30.65 | 104.08 | 2 | 3 | 1 | 3 | 1 | 5 | 1 | 7 | 2 | 2 | 2 | 2 | 4 | 2 | 4 | 4  | 6 | 1 | 2 | 4 | 4 | 3 | 3 | 4 |
| B760 | 2010 | This<br>study                           | BSP1   | Sichuan | 30.65 | 104.08 | 2 | 3 | 1 | 3 | 1 | 5 | 1 | 7 | 2 | 4 | 2 | 2 | 3 | 2 | 4 | 5  | 6 | 3 | 2 | 3 | 4 | 4 | 3 | 6 |
| B761 | 2010 | This<br>study                           | BSP1   | Sichuan | 30.65 | 104.08 | 2 | 3 | 1 | 2 | 1 | 5 | 1 | 6 | 0 | 3 | 2 | 0 | 4 | 2 | 4 | 4  | 6 | 2 | 2 | 3 | 4 | 4 | 3 | 4 |
| B762 | 2010 | This<br>study                           | BSP1   | Sichuan | 30.65 | 104.08 | 2 | 3 | 1 | 3 | 1 | 5 | 1 | 7 | 2 | 3 | 2 | 2 | 4 | 2 | 4 | 7  | 6 | 1 | 3 | 4 | 4 | 4 | 3 | 4 |
| B763 | 2010 | This<br>study                           | BSP1   | Sichuan | 30.65 | 104.08 | 2 | 3 | 0 | 3 | 0 | 5 | 1 | 7 | 2 | 3 | 2 | 2 | 4 | 2 | 4 | 3  | 5 | 2 | 2 | 3 | 4 | 4 | 3 | 3 |
| B764 | 2010 | This<br>study                           | BSP1   | Sichuan | 30.65 | 104.08 | 2 | 3 | 0 | 3 | 1 | 5 | 1 | 7 | 2 | 3 | 2 | 2 | 4 | 2 | 4 | 6  | 6 | 1 | 3 | 5 | 5 | 4 | 3 | 4 |
| B765 | 2010 | This<br>study                           | BSP1   | Sichuan | 30.65 | 104.08 | 2 | 3 | 1 | 3 | 1 | 5 | 1 | 7 | 1 | 3 | 3 | 2 | 3 | 2 | 4 | 5  | 6 | 1 | 3 | 5 | 4 | 4 | 3 | 4 |
| B766 | 2010 | This<br>study                           | BSP1   | Sichuan | 30.65 | 104.08 | 2 | 3 | 1 | 3 | 1 | 5 | 1 | 7 | 2 | 3 | 2 | 2 | 3 | 2 | 4 | 5  | 5 | 1 | 3 | 5 | 4 | 4 | 3 | 4 |
| B767 | 2010 | This<br>study                           | BSP1   | Sichuan | 30.65 | 104.08 | 2 | 3 | 1 | 3 | 1 | 5 | 1 | 7 | 2 | 3 | 2 | 2 | 4 | 2 | 4 | 6  | 6 | 1 | 3 | 4 | 4 | 4 | 3 | 4 |
| B768 | 2010 | This<br>study                           | BSP1   | Sichuan | 30.65 | 104.08 | 2 | 3 | 0 | 2 | 1 | 5 | 1 | 5 | 2 | 3 | 2 | 3 | 4 | 2 | 4 | 7  | 7 | 3 | 3 | 3 | 4 | 4 | 3 | 4 |
| B769 | 2010 | This<br>study                           | BSP1   | Sichuan | 30.65 | 104.08 | 2 | 3 | 2 | 1 | 1 | 5 | 1 | 6 | 2 | 4 | 2 | 2 | 4 | 2 | 4 | 5  | 7 | 0 | 2 | 5 | 4 | 4 | 3 | 5 |
| B770 | 2010 | This<br>study                           | BSP1   | Sichuan | 30.65 | 104.08 | 2 | 3 | 2 | 2 | 1 | 5 | 1 | 6 | 2 | 4 | 2 | 2 | 4 | 2 | 4 | 2  | 7 | 0 | 1 | 5 | 4 | 4 | 3 | 5 |
| B771 | 2010 | This<br>study                           | BSP1   | Sichuan | 30.65 | 104.08 | 2 | 3 | 2 | 2 | 1 | 5 | 1 | 4 | 1 | 5 | 2 | 2 | 4 | 2 | 4 | 2  | 7 | 1 | 0 | 4 | 2 | 4 | 3 | 4 |
| B772 | 2010 | This<br>study                           | BSP1   | Sichuan | 30.65 | 104.08 | 2 | 3 | 1 | 2 | 1 | 5 | 1 | 6 | 2 | 5 | 2 | 2 | 4 | 2 | 4 | 6  | 6 | 0 | 2 | 5 | 4 | 4 | 3 | 4 |
| B773 | 2010 | This<br>study                           | BSP1   | Sichuan | 30.65 | 104.08 | 2 | 3 | 1 | 2 | 1 | 5 | 1 | 6 | 2 | 5 | 2 | 2 | 4 | 2 | 4 | 5  | 6 | 0 | 2 | 5 | 4 | 4 | 3 | 4 |
| B774 | 2010 | This<br>study                           | BSP1   | Sichuan | 30.65 | 104.08 | 2 | 3 | 2 | 4 | 1 | 5 | 1 | 6 | 2 | 3 | 2 | 2 | 4 | 2 | 4 | 5  | 5 | 1 | 2 | 5 | 4 | 4 | 3 | 4 |
| B775 | 2010 | This<br>study                           | BSP1   | Sichuan | 30.65 | 104.08 | 2 | 3 | 2 | 2 | 1 | 5 | 1 | 7 | 2 | 4 | 2 | 2 | 4 | 2 | 4 | 5  | 4 | 2 | 2 | 5 | 4 | 4 | 3 | 4 |
| B776 | 2010 | This<br>study                           | BSP1   | Sichuan | 30.65 | 104.08 | 2 | 3 | 2 | 1 | 1 | 5 | 1 | 7 | 2 | 4 | 1 | 2 | 4 | 2 | 3 | 5  | 6 | 1 | 2 | 3 | 4 | 4 | 3 | 4 |
| B777 | 2010 | This<br>study                           | BSP1   | Sichuan | 30.65 | 104.08 | 2 | 3 | 2 | 2 | 1 | 5 | 1 | 6 | 2 | 4 | 1 | 2 | 4 | 2 | 4 | 5  | 7 | 0 | 1 | 5 | 4 | 4 | 3 | 4 |
| B778 | 2010 | This<br>study                           | BSP1   | Sichuan | 30.65 | 104.08 | 2 | 3 | 2 | 2 | 1 | 5 | 1 | 6 | 2 | 1 | 1 | 2 | 4 | 2 | 4 | 5  | 5 | 2 | 2 | 4 | 4 | 4 | 3 | 4 |
| B779 | 2010 | This<br>study                           | BSP1   | Sichuan | 30.65 | 104.08 | 2 | 3 | 2 | 2 | 1 | 5 | 1 | 6 | 2 | 4 | 1 | 2 | 4 | 2 | 4 | 6  | 6 | 2 | 2 | 3 | 4 | 4 | 3 | 4 |
| B780 | 2010 | This<br>study                           | BSP1   | Sichuan | 30.65 | 104.08 | 2 | 3 | 2 | 1 | 2 | 5 | 1 | 7 | 2 | 6 | 1 | 3 | 4 | 2 | 4 | 5  | 4 | 2 | 2 | 4 | 4 | 4 | 3 | 4 |

|      |      |            |      |         |       |        |   |   |   |    |   |    |   |    |   |   |   |   |   |   |   |    |    |   |    |    |   |   |   |   |
|------|------|------------|------|---------|-------|--------|---|---|---|----|---|----|---|----|---|---|---|---|---|---|---|----|----|---|----|----|---|---|---|---|
| B781 | 2010 | This study | BSP1 | Sichuan | 30.65 | 104.08 | 2 | 3 | 2 | 2  | 1 | 5  | 1 | 6  | 2 | 6 | 1 | 2 | 4 | 2 | 4 | 4  | 6  | 1 | 2  | 7  | 4 | 4 | 3 | 3 |
| B782 | 2010 | This study | BSP1 | Sichuan | 30.65 | 104.08 | 2 | 3 | 2 | 2  | 1 | 5  | 1 | 3  | 2 | 5 | 0 | 2 | 4 | 2 | 4 | 5  | 7  | 1 | 2  | 6  | 4 | 4 | 3 | 3 |
| B783 | 2010 | This study | BSP1 | Sichuan | 30.65 | 104.08 | 2 | 3 | 2 | 2  | 1 | 5  | 1 | 6  | 2 | 6 | 2 | 3 | 4 | 2 | 5 | 5  | 7  | 2 | 2  | 5  | 4 | 4 | 3 | 4 |
| B784 | 2010 | This study | BSP1 | Sichuan | 30.65 | 104.08 | 2 | 3 | 2 | 2  | 1 | 5  | 1 | 4  | 2 | 5 | 2 | 3 | 4 | 2 | 4 | 2  | 5  | 2 | 2  | 5  | 4 | 4 | 3 | 5 |
| B785 | 2010 | This study | BSP1 | Sichuan | 30.65 | 104.08 | 2 | 3 | 2 | 2  | 1 | 5  | 1 | 6  | 2 | 4 | 2 | 3 | 4 | 2 | 4 | 4  | 7  | 1 | 0  | 6  | 4 | 4 | 3 | 4 |
| B786 | 2010 | This study | BSP1 | Sichuan | 30.65 | 104.08 | 2 | 3 | 2 | 2  | 1 | 5  | 1 | 6  | 2 | 5 | 2 | 3 | 4 | 2 | 4 | 4  | 7  | 1 | 2  | 6  | 4 | 4 | 3 | 4 |
| B787 | 2010 | This study | BSP1 | Sichuan | 30.65 | 104.08 | 2 | 3 | 2 | 2  | 1 | 5  | 1 | 5  | 2 | 6 | 1 | 3 | 4 | 2 | 4 | 4  | 5  | 1 | 2  | 6  | 4 | 4 | 3 | 4 |
| B788 | 2010 | This study | BSP1 | Sichuan | 30.65 | 104.08 | 2 | 3 | 2 | 2  | 1 | 5  | 1 | 6  | 2 | 6 | 2 | 3 | 3 | 2 | 4 | ND | 7  | 1 | 2  | 6  | 4 | 4 | 3 | 4 |
| B789 | 2010 | This study | BSP1 | Sichuan | 30.65 | 104.08 | 2 | 3 | 2 | 2  | 1 | 9  | 1 | 7  | 2 | 3 | 1 | 3 | 4 | 2 | 4 | 3  | 7  | 2 | 3  | 4  | 4 | 4 | 3 | 2 |
| B790 | 2010 | This study | BSP1 | Sichuan | 30.65 | 104.08 | 2 | 3 | 2 | 2  | 2 | 9  | 1 | 7  | 2 | 4 | 3 | 3 | 4 | 2 | 5 | 5  | 3  | 1 | 2  | 5  | 4 | 4 | 3 | 4 |
| B791 | 2010 | This study | BSP1 | Sichuan | 30.65 | 104.08 | 2 | 3 | 1 | 2  | 2 | 9  | 1 | 7  | 2 | 4 | 1 | 3 | 4 | 2 | 4 | 5  | 8  | 1 | 2  | 5  | 4 | 4 | 3 | 4 |
| B792 | 2010 | This study | BSP1 | Sichuan | 30.65 | 104.08 | 2 | 3 | 2 | 2  | 2 | 9  | 1 | 7  | 2 | 4 | 2 | 3 | 4 | 2 | 4 | 5  | 7  | 2 | 2  | 4  | 4 | 4 | 3 | 4 |
| B793 | 2010 | This study | BSP1 | Sichuan | 30.65 | 104.08 | 2 | 3 | 2 | 2  | 3 | 9  | 1 | 7  | 2 | 4 | 2 | 3 | 4 | 2 | 4 | 5  | 6  | 3 | 2  | 4  | 4 | 4 | 3 | 4 |
| B794 | 2010 | This study | BSP1 | Sichuan | 30.65 | 104.08 | 2 | 3 | 2 | 1  | 3 | 9  | 1 | 7  | 2 | 4 | 2 | 3 | 4 | 2 | 4 | 5  | 8  | 3 | 2  | 4  | 4 | 4 | 3 | 3 |
| B795 | 2010 | This study | BSP1 | Sichuan | 30.65 | 104.08 | 2 | 3 | 2 | 2  | 3 | 8  | 1 | 6  | 2 | 4 | 1 | 2 | 4 | 2 | 4 | 4  | 8  | 3 | 3  | 4  | 4 | 4 | 3 | 4 |
| B796 | 2010 | This study | BSP1 | Sichuan | 30.65 | 104.08 | 2 | 3 | 2 | 2  | 2 | 9  | 1 | 7  | 2 | 4 | 2 | 2 | 4 | 2 | 4 | 5  | 8  | 1 | 3  | 5  | 3 | 4 | 3 | 3 |
| B797 | 2010 | This study | BSP1 | Sichuan | 30.65 | 104.08 | 2 | 1 | 2 | 2  | 3 | 9  | 1 | 7  | 2 | 4 | 1 | 3 | 4 | 3 | 4 | 4  | 8  | 1 | 2  | 5  | 4 | 4 | 3 | 3 |
| B798 | 2010 | This study | BSP1 | Sichuan | 30.65 | 104.08 | 2 | 2 | 2 | 1  | 2 | 9  | 1 | 7  | 2 | 4 | 1 | 3 | 4 | 2 | 4 | 2  | 8  | 1 | 2  | 4  | 4 | 4 | 3 | 4 |
| B799 | 2010 | This study | BSP1 | Sichuan | 30.65 | 104.08 | 2 | 3 | 2 | 2  | 2 | ND | 1 | ND | 2 | 4 | 1 | 3 | 4 | 2 | 4 | 5  | 7  | 3 | ND | 4  | 4 | 4 | 3 | 3 |
| B800 | 2010 | This study | BSP1 | Sichuan | 30.65 | 104.08 | 2 | 3 | 2 | 1  | 1 | 9  | 1 | 7  | 2 | 4 | 1 | 3 | 2 | 2 | 4 | 4  | 7  | 3 | 3  | 3  | 4 | 4 | 3 | 3 |
| B801 | 2010 | This study | BSP1 | Sichuan | 30.65 | 104.08 | 2 | 3 | 2 | 2  | 2 | 9  | 1 | 7  | 2 | 3 | 1 | 3 | 2 | 2 | 4 | 6  | 8  | 4 | 3  | 4  | 4 | 4 | 3 | 4 |
| B802 | 2010 | This study | BSP1 | Sichuan | 30.65 | 104.08 | 2 | 3 | 1 | 1  | 3 | 7  | 1 | 5  | 2 | 2 | 0 | 3 | 1 | 1 | 4 | 2  | 5  | 2 | 0  | 3  | 4 | 2 | 3 | 4 |
| B803 | 2010 | This study | BSP1 | Sichuan | 30.65 | 104.08 | 2 | 3 | 2 | 2  | 2 | 9  | 1 | 9  | 2 | 3 | 0 | 3 | 4 | 2 | 4 | 5  | 7  | 1 | 2  | 5  | 4 | 2 | 3 | 4 |
| B804 | 2010 | This study | BSP1 | Sichuan | 30.65 | 104.08 | 2 | 3 | 2 | 2  | 3 | 9  | 1 | 8  | 2 | 4 | 1 | 4 | 4 | 2 | 4 | 1  | 6  | 4 | ND | 4  | 4 | 4 | 3 | 5 |
| B805 | 2011 | This study | BSP1 | Sichuan | 30.65 | 104.08 | 2 | 3 | 2 | 2  | 2 | 9  | 1 | 7  | 2 | 6 | 0 | 4 | 3 | 2 | 4 | 6  | 7  | 4 | ND | 3  | 4 | 4 | 3 | 5 |
| B806 | 2011 | This study | BSP1 | Sichuan | 30.65 | 104.08 | 2 | 3 | 2 | 2  | 2 | 9  | 1 | 7  | 2 | 3 | 1 | 4 | 4 | 2 | 5 | 5  | 3  | 1 | 2  | 5  | 4 | 4 | 3 | 3 |
| B807 | 2011 | This study | BSP1 | Sichuan | 30.65 | 104.08 | 2 | 3 | 1 | 2  | 2 | 7  | 1 | 5  | 2 | 1 | 0 | 7 | 3 | 1 | 3 | 2  | 4  | 1 | 0  | 2  | 4 | 2 | 3 | 5 |
| B808 | 2010 | This study | BSP1 | Sichuan | 30.65 | 104.08 | 2 | 5 | 3 | 1  | 2 | 5  | 1 | 7  | 3 | 3 | 4 | 4 | 4 | 2 | 4 | 4  | 8  | 2 | 4  | 5  | 4 | 4 | 3 | 4 |
| B809 | 2010 | This study | BSP1 | Sichuan | 30.65 | 104.08 | 2 | 5 | 4 | 2  | 2 | 5  | 1 | 8  | 2 | 4 | 3 | 2 | 4 | 2 | 4 | 4  | 9  | 3 | 3  | 4  | 4 | 4 | 3 | 6 |
| B810 | 2010 | This study | BSP1 | Sichuan | 30.65 | 104.08 | 2 | 5 | 4 | 3  | 2 | 5  | 1 | 8  | 2 | 4 | 5 | 4 | 3 | 2 | 4 | 3  | 8  | 2 | 4  | 5  | 4 | 4 | 3 | 6 |
| B811 | 2010 | This study | BSP1 | Sichuan | 30.65 | 104.08 | 2 | 5 | 4 | 2  | 2 | 5  | 1 | 8  | 3 | 4 | 5 | 4 | 4 | 2 | 4 | 5  | 7  | 5 | 3  | 4  | 4 | 4 | 3 | 6 |
| B812 | 2010 | This study | BSP1 | Sichuan | 30.65 | 104.08 | 2 | 5 | 4 | 3  | 2 | 5  | 1 | 8  | 3 | 4 | 5 | 4 | 4 | 2 | 4 | 7  | 6  | 5 | 6  | 4  | 4 | 4 | 3 | 5 |
| B813 | 2010 | This study | BSP1 | Sichuan | 30.65 | 104.08 | 2 | 5 | 4 | 2  | 2 | 5  | 1 | 8  | 3 | 4 | 5 | 4 | 4 | 2 | 4 | 1  | 8  | 2 | 3  | 5  | 4 | 4 | 3 | 6 |
| B814 | 2010 | This study | BSP1 | Sichuan | 30.65 | 104.08 | 2 | 5 | 4 | 2  | 2 | 5  | 0 | 8  | 3 | 4 | 4 | 5 | 4 | 2 | 4 | 3  | 7  | 2 | 4  | ND | 4 | 4 | 3 | 5 |
| B815 | 2010 | This study | BSP1 | Sichuan | 30.65 | 104.08 | 2 | 5 | 3 | 2  | 2 | 5  | 0 | 6  | 2 | 3 | 4 | 3 | 4 | 2 | 4 | ND | 7  | 1 | 1  | 4  | 4 | 4 | 3 | 4 |
| B816 | 2010 | This study | BSP1 | Sichuan | 30.65 | 104.08 | 2 | 5 | 4 | 2  | 2 | 2  | 0 | 8  | 2 | 4 | 4 | 3 | 4 | 2 | 4 | 2  | 7  | 2 | 4  | ND | 4 | 4 | 3 | 4 |
| B817 | 2010 | This study | BSP1 | Sichuan | 30.65 | 104.08 | 2 | 5 | 4 | 2  | 2 | 5  | 0 | 8  | 2 | 3 | 4 | 4 | 4 | 2 | 4 | 4  | 6  | 2 | 4  | 5  | 4 | 4 | 3 | 4 |
| B818 | 2010 | This study | BSP1 | Sichuan | 30.65 | 104.08 | 2 | 5 | 3 | ND | 1 | 5  | 0 | 8  | 2 | 3 | 5 | 4 | 4 | 2 | 4 | 3  | 6  | 4 | 4  | 4  | 4 | 4 | 3 | 4 |
| B819 | 2010 | This study | BSP1 | Sichuan | 30.65 | 104.08 | 2 | 5 | 4 | 3  | 2 | 5  | 0 | 8  | 1 | 4 | 4 | 4 | 4 | 2 | 4 | 3  | 4  | 2 | 4  | 5  | 4 | 4 | 3 | 7 |
| B820 | 2010 | This study | BSP1 | Sichuan | 30.65 | 104.08 | 2 | 5 | 4 | 3  | 2 | 5  | 0 | 8  | 2 | 4 | 4 | 4 | 4 | 2 | 4 | 5  | 6  | 4 | 4  | 4  | 4 | 4 | 3 | 5 |
| B821 | 2010 | This study | BSP1 | Sichuan | 30.65 | 104.08 | 2 | 5 | 3 | 1  | 2 | 5  | 0 | 7  | 2 | 2 | 2 | 4 | 4 | 2 | 4 | 3  | 5  | 3 | 2  | 4  | 4 | 4 | 3 | 3 |
| B822 | 2010 | This study | BSP1 | Sichuan | 30.65 | 104.08 | 2 | 6 | 4 | 2  | 2 | 5  | 0 | 8  | 2 | 2 | 3 | 4 | 4 | 2 | 4 | 4  | 8  | 2 | 4  | 4  | 4 | 4 | 3 | 5 |
| B823 | 2010 | This study | BSP1 | Sichuan | 30.65 | 104.08 | 2 | 5 | 3 | 2  | 2 | 5  | 0 | 8  | 2 | 3 | 4 | 3 | 4 | 2 | 4 | 4  | 8  | 2 | 4  | 4  | 4 | 4 | 3 | 7 |
| B824 | 2010 | This study | BSP1 | Sichuan | 30.65 | 104.08 | 2 | 5 | 4 | 2  | 2 | 5  | 0 | 6  | 2 | 3 | 4 | 4 | 4 | 2 | 4 | 4  | 9  | 2 | 4  | 4  | 4 | 4 | 3 | 8 |
| B825 | 2010 | This study | BSP1 | Sichuan | 30.65 | 104.08 | 2 | 5 | 4 | 1  | 2 | 5  | 1 | 6  | 2 | 2 | 3 | 4 | 4 | 2 | 4 | 3  | ND | 5 | 3  | 6  | 4 | 4 | 3 | 5 |
| B826 | 2010 | This study | BSP1 | Sichuan | 30.65 | 104.08 | 2 | 3 | 3 | 3  | 2 | 5  | 1 | 6  | 2 | 5 | 3 | 3 | 4 | 2 | 4 | 5  | 3  | 1 | 3  | 5  | 4 | 4 | 3 | 4 |
| B827 | 2010 | This study | BSP1 | Sichuan | 30.65 | 104.08 | 2 | 3 | 1 | 3  | 2 | 5  | 1 | 1  | 2 | 3 | 1 | 4 | 2 | 1 | 4 | 3  | 7  | 2 | 0  | 3  | 4 | 2 | 3 | 8 |
| B828 | 2010 | This study | BSP1 | Sichuan | 30.65 | 104.08 | 2 | 4 | 2 | 3  | 2 | 5  | 1 | 3  | 2 | 3 | 1 | 2 | 3 | 1 | 4 | 2  | 8  | 1 | 0  | 3  | 3 | 2 | 3 | 4 |



|      |      |            |        |         |       |        |   |   |   |   |   |   |   |    |   |    |   |    |    |   |   |   |    |    |    |    |   |   |   |   |
|------|------|------------|--------|---------|-------|--------|---|---|---|---|---|---|---|----|---|----|---|----|----|---|---|---|----|----|----|----|---|---|---|---|
| B829 | 2010 | This study | BSP1   | Sichuan | 30.65 | 104.08 | 2 | 3 | 3 | 3 | 2 | 5 | 1 | 6  | 2 | 6  | 2 | 3  | ND | 2 | 4 | 3 | 9  | 1  | 3  | 5  | 4 | 4 | 3 | 5 |
| B830 | 2010 | This study | BSP1   | Sichuan | 30.65 | 104.08 | 2 | 3 | 3 | 3 | 2 | 5 | 1 | 6  | 2 | 5  | 1 | 3  | 4  | 2 | 4 | 6 | 8  | 1  | 3  | 6  | 4 | 4 | 3 | 4 |
| B831 | 2010 | This study | BSP1   | Sichuan | 30.65 | 104.08 | 2 | 3 | 3 | 3 | 3 | 5 | 1 | 6  | 2 | 6  | 2 | 3  | 3  | 1 | 4 | 5 | 8  | 1  | 2  | 5  | 4 | 4 | 3 | 5 |
| B832 | 2010 | This study | BSPint | Sichuan | 30.65 | 104.08 | 2 | 3 | 3 | 3 | 2 | 5 | 1 | 7  | 2 | 6  | 1 | 3  | 4  | 2 | 4 | 7 | 7  | 4  | ND | 4  | 4 | 4 | 3 | 4 |
| B833 | 2010 | This study | BSP1   | Sichuan | 30.65 | 104.08 | 2 | 3 | 3 | 4 | 1 | 5 | 1 | 6  | 2 | 5  | 1 | 5  | 4  | 2 | 4 | 4 | 7  | 2  | 1  | 3  | 4 | 2 | 3 | 6 |
| B834 | 2010 | This study | BSP1   | Sichuan | 30.65 | 104.08 | 2 | 3 | 3 | 3 | 2 | 5 | 1 | 6  | 2 | 6  | 2 | 3  | 4  | 2 | 4 | 6 | 9  | 2  | 1  | 5  | 4 | 4 | 3 | 5 |
| B835 | 2010 | This study | BSP1   | Sichuan | 30.65 | 104.08 | 2 | 3 | 3 | 3 | 2 | 5 | 1 | 6  | 2 | 7  | 2 | ND | 4  | 2 | 4 | 5 | 7  | 2  | 3  | 5  | 4 | 4 | 3 | 6 |
| B836 | 2010 | This study | BSP1   | Sichuan | 30.65 | 104.08 | 2 | 3 | 3 | 3 | 2 | 5 | 1 | 3  | 2 | 6  | 2 | 3  | 4  | 2 | 4 | 7 | 8  | 4  | 3  | 4  | 4 | 4 | 3 | 5 |
| B837 | 2010 | This study | BSP1   | Sichuan | 30.65 | 104.08 | 2 | 3 | 3 | 3 | 2 | 5 | 1 | 6  | 2 | 6  | 2 | 3  | 4  | 2 | 4 | 6 | 8  | 4  | 3  | 4  | 4 | 4 | 3 | 6 |
| B838 | 2010 | This study | BSP1   | Sichuan | 30.65 | 104.08 | 2 | 3 | 3 | 3 | 2 | 5 | 1 | 6  | 2 | 6  | 2 | 3  | 4  | 2 | 4 | 6 | 8  | 4  | 3  | 4  | 4 | 4 | 3 | 7 |
| B839 | 2010 | This study | BSP1   | Sichuan | 30.65 | 104.08 | 2 | 3 | 3 | 3 | 2 | 5 | 1 | 6  | 2 | 6  | 2 | 3  | 4  | 2 | 4 | 1 | 9  | 4  | 3  | 4  | 4 | 4 | 3 | 7 |
| B840 | 2010 | This study | BSP1   | Sichuan | 30.65 | 104.08 | 2 | 3 | 3 | 3 | 2 | 5 | 1 | 8  | 2 | 6  | 2 | 3  | 4  | 2 | 3 | 6 | 4  | 1  | 3  | 5  | 4 | 4 | 2 | 5 |
| B841 | 2010 | This study | BSP1   | Sichuan | 30.65 | 104.08 | 2 | 3 | 3 | 4 | 2 | 5 | 1 | 6  | 2 | 6  | 3 | 3  | 4  | 2 | 4 | 5 | 4  | 4  | 1  | 3  | 4 | 4 | 3 | 8 |
| B842 | 2010 | This study | BSP1   | Sichuan | 30.65 | 104.08 | 2 | 3 | 3 | 3 | 2 | 5 | 1 | 7  | 2 | 6  | 2 | 4  | 4  | 2 | 4 | 6 | 7  | 2  | ND | 5  | 4 | 4 | 3 | 6 |
| B843 | 2010 | This study | BSP1   | Sichuan | 30.65 | 104.08 | 2 | 3 | 3 | 3 | 2 | 5 | 1 | 7  | 2 | 6  | 3 | 4  | 4  | 2 | 4 | 5 | ND | 3  | ND | 4  | 4 | 4 | 3 | 4 |
| B844 | 2011 | This study | BSP1   | Sichuan | 30.65 | 104.08 | 2 | 3 | 2 | 2 | 1 | 5 | 1 | 7  | 3 | ND | 3 | 3  | 2  | 3 | 4 | 6 | 7  | 5  | 4  | 4  | 4 | 4 | 3 | 6 |
| B845 | 2011 | This study | BSP1   | Sichuan | 30.65 | 104.08 | 2 | 3 | 2 | 2 | 0 | 5 | 1 | 7  | 3 | 7  | 3 | 3  | 2  | 3 | 5 | 4 | 7  | 4  | 3  | 4  | 4 | 4 | 3 | 4 |
| B846 | 2011 | This study | BSP1   | Sichuan | 30.65 | 104.08 | 2 | 3 | 2 | 2 | 1 | 5 | 1 | 7  | 3 | 6  | 3 | 3  | 2  | 3 | 5 | 4 | 8  | 2  | 3  | 5  | 4 | 4 | 3 | 2 |
| B847 | 2011 | This study | BSP1   | Sichuan | 30.65 | 104.08 | 2 | 3 | 3 | 1 | 1 | 5 | 1 | 7  | 3 | 6  | 3 | 3  | 2  | 3 |   | 3 | 8  | 2  | 3  | 5  | 4 | 4 | 3 | 4 |
| B848 | 2011 | This study | BSP1   | Sichuan | 30.65 | 104.08 | 2 | 3 | 2 | 2 | 1 | 5 | 1 | ND | 3 | 6  | 1 | 3  | 2  | 3 | 5 | 4 | 7  | 4  | 3  | 4  | 4 | 4 | 3 | 4 |
| B849 | 2011 | This study | BSP1   | Sichuan | 30.65 | 104.08 | 2 | 3 | 1 | 1 | 1 | 5 | 1 | 5  | 3 | 4  | 2 | 3  | 1  | 2 | 4 | 3 | 9  | 2  | 1  | 3  | 4 | 4 | 3 | 4 |
| B850 | 2011 | This study | BSP1   | Sichuan | 30.65 | 104.08 | 2 | 3 | 2 | 2 | 1 | 5 | 1 | 7  | 3 | 6  | 3 | 3  | 2  | 3 | 5 | 5 | 3  | 2  | 3  | 5  | 4 | 5 | 3 | 4 |
| B851 | 2011 | This study | BSPint | Sichuan | 30.65 | 104.08 | 2 | 3 | 2 | 2 | 1 | 5 | 1 | 7  | 3 | 5  | 3 | 3  | 2  | 3 | 2 | 6 | 8  | 4  | 3  | 4  | 4 | 4 | 3 | 4 |
| B852 | 2011 | This study | BSP1   | Sichuan | 30.65 | 104.08 | 2 | 3 | 2 | 2 | 1 | 5 | 1 | 6  | 3 | 6  | 3 | 2  | 2  | 3 | 5 | 2 | 8  | 3  | 2  | 4  | 4 | 4 | 3 | 7 |
| B853 | 2011 | This study | BSP1   | Sichuan | 30.65 | 104.08 | 2 | 3 | 2 | 2 | 1 | 5 | 1 | 7  | 1 | 6  | 3 | 1  | 2  | 3 | 5 | 5 | 9  | 3  | 2  | 4  | 4 | 4 | 3 | 4 |
| B854 | 2011 | This study | BSP1   | Sichuan | 30.65 | 104.08 | 2 | 3 | 2 | 2 | 1 | 5 | 1 | 7  | 2 | 6  | 3 | 4  | 2  | 3 | 5 | 4 | 3  | 2  | 3  | ND | 4 | 4 | 3 | 3 |
| B855 | 2010 | This study | BSP1   | Sichuan | 30.65 | 104.08 | 2 | 3 | 3 | 3 | 2 | 5 | 1 | 6  | 3 | 8  | 3 | 3  | 4  | 2 | 4 | 4 | ND | 2  | 3  | 9  | 4 | 4 | 3 | 4 |
| B856 | 2010 | This study | BSP1   | Sichuan | 30.65 | 104.08 | 2 | 3 | 3 | 3 | 2 | 5 | 1 | 6  | 1 | 5  | 2 | 3  | 4  | 2 | 4 | 3 | ND | 4  | 2  | 4  | 4 | 4 | 3 | 4 |
| B857 | 2010 | This study | BSP1   | Sichuan | 30.65 | 104.08 | 2 | 3 | 2 | 3 | 2 | 5 | 1 | 6  | 2 | 3  | 4 | 3  | 4  | 2 | 4 | 4 | 9  | 2  | ND | 5  | 4 | 4 | 3 | 4 |
| B858 | 2010 | This study | BSP1   | Sichuan | 30.65 | 104.08 | 2 | 3 | 3 | 3 | 2 | 5 | 1 | 8  | 2 | 3  | 3 | 3  | 4  | 2 | 4 | 3 | ND | 3  | 3  | 4  | 4 | 4 | 3 | 3 |
| B859 | 2010 | This study | BSP1   | Sichuan | 30.65 | 104.08 | 2 | 3 | 3 | 3 | 2 | 5 | 1 | ND | 3 | 5  | 3 | 3  | 3  | 2 | 4 | 5 | ND | 2  | 2  | 5  | 4 | 4 | 3 | 5 |
| B860 | 2010 | This study | BSPint | Sichuan | 30.65 | 104.08 | 2 | 3 | 3 | 3 | 2 | 5 | 1 | 7  | 3 | 5  | 3 | 3  | 4  | 2 | 4 | 5 | ND | 2  | 2  | 5  | 4 | 4 | 3 | 5 |
| B861 | 2010 | This study | BSP1   | Sichuan | 30.65 | 104.08 | 2 | 3 | 3 | 3 | 2 | 5 | 1 | 7  | 2 | 4  | 3 | 3  | 4  | 2 | 4 | 5 | ND | 2  | 2  | 4  | 4 | 4 | 3 | 4 |
| B862 | 2010 | This study | BSP1   | Sichuan | 30.65 | 104.08 | 2 | 3 | 3 | 3 | 2 | 5 | 1 | 7  | 3 | 5  | 2 | 2  | 3  | 2 | 4 | 4 | 8  | 1  | 2  | 5  | 4 | 4 | 2 | 1 |
| B863 | 2010 | This study | BSP1   | Sichuan | 30.65 | 104.08 | 2 | 3 | 3 | 3 | 2 | 5 | 1 | 7  | 3 | 5  | 3 | 3  | 4  | 2 | 4 | 5 | 5  | 1  | 2  | 7  | 4 | 4 | 4 | 1 |
| B864 | 2010 | This study | BSPint | Sichuan | 30.65 | 104.08 | 2 | 3 | 3 | 3 | 2 | 5 | 1 | 7  | 3 | 5  | 3 | 3  | 4  | 2 | 4 | 3 | 7  | 2  | 2  | 5  | 4 | 4 | 3 | 2 |
| B865 | 2010 | This study | BSP1   | Sichuan | 30.65 | 104.08 | 2 | 3 | 3 | 3 | 2 | 5 | 1 | 7  | 2 | 5  | 3 | 1  | 4  | 2 | 4 | 2 | ND | 2  | 2  | 4  | 4 | 4 | 3 | 2 |
| B866 | 2010 | This study | BSPint | Sichuan | 30.65 | 104.08 | 2 | 3 | 1 | 3 | 2 | 5 | 1 | 5  | 3 | 5  | 3 | 3  | 4  | 2 | 4 | 5 | 9  | 4  | 3  | 4  | 4 | 4 | 3 | 4 |
| B867 | 2010 | This study | BSP5   | Sichuan | 30.65 | 104.08 | 2 | 3 | 3 | 3 | 2 | 5 | 1 | 6  | 3 | 5  | 3 | 3  | 4  | 2 | 4 | 5 | 9  | 2  | 3  | 5  | 2 | 4 | 3 | 2 |
| B868 | 2010 | This study | BSPint | Sichuan | 30.65 | 104.08 | 2 | 3 | 3 | 3 | 2 | 5 | 1 | 7  | 3 | 5  | 3 | 4  | 4  | 2 | 4 | 5 | 8  | 2  | 3  | 5  | 4 | 5 | 3 | 1 |
| B869 | 2010 | This study | BSP1   | Sichuan | 30.65 | 104.08 | 2 | 3 | 3 | 3 | 2 | 5 | 1 | 7  | 3 | 5  | 3 | 3  | 2  | 2 | 4 | 3 | 7  | 2  | 2  | 5  | 4 | 4 | 3 | 1 |
| B870 | 2010 | This study | BSP1   | Sichuan | 30.65 | 104.08 | 2 | 3 | 3 | 3 | 2 | 5 | 1 | 5  | 3 | 5  | 4 | 2  | 4  | 2 | 4 | 4 | 6  | ND | 3  | 4  | 4 | 4 | 3 | 1 |
| B871 | 2010 | This study | BSP1   | Sichuan | 30.65 | 104.08 | 2 | 3 | 3 | 3 | 2 | 5 | 1 | 7  | 3 | 5  | 1 | 3  | 4  | 2 | 4 | 5 | 7  | 1  | 2  | 5  | 4 | 4 | 3 | 0 |
| B872 | 2010 | This study | BSPint | Sichuan | 30.65 | 104.08 | 2 | 3 | 3 | 4 | 2 | 5 | 1 | 7  | 2 | 5  | 3 | 3  | 4  | 2 | 4 | 5 | 6  | 4  | 2  | 4  | 4 | 4 | 3 | 3 |
| B873 | 2010 | This study | BSP1   | Sichuan | 30.65 | 104.08 | 2 | 3 | 3 | 3 | 2 | 5 | 1 | 7  | 2 | 5  | 3 | 4  | 4  | 2 | 4 | 3 | 2  | 4  | 3  | 4  | 4 | 4 | 3 | 4 |
| B874 | 2010 | This study | BSP5   | Sichuan | 30.65 | 104.08 | 2 | 3 | 3 | 3 | 2 | 5 | 1 | 5  | 2 | 5  | 3 | 3  | 4  | 2 | 4 | 5 | 7  | 2  | 3  | 5  | 4 | 4 | 3 | 3 |
| B875 | 2010 | This study | BSP1   | Sichuan | 30.65 | 104.08 | 2 | 3 | 3 | 3 | 2 | 5 | 1 | 7  | 2 | 5  | 2 | 3  | 4  | 2 | 4 | 5 | 9  | 2  | 3  | 5  | 4 | 4 | 3 | 3 |
| B876 | 2010 | This study | BSP1   | Sichuan | 30.65 | 104.08 | 2 | 3 | 2 | 3 | 2 | 5 | 1 | 6  | 2 | 5  | 3 | 2  | 4  | 1 | 4 | 5 | 9  | 2  | 3  | 5  | 4 | 4 | 3 | 4 |

|      |           |                                   |        |         |       |        |   |    |   |   |   |   |    |   |   |   |   |   |   |   |   |   |   |    |    |   |   |   |   |   |
|------|-----------|-----------------------------------|--------|---------|-------|--------|---|----|---|---|---|---|----|---|---|---|---|---|---|---|---|---|---|----|----|---|---|---|---|---|
| B877 | 2010      | This study                        | BSP1   | Sichuan | 30.65 | 104.08 | 2 | 3  | 3 | 3 | 2 | 5 | 1  | 5 | 2 | 5 | 2 | 3 | 4 | 2 | 4 | 5 | 8 | 3  | 3  | 4 | 4 | 4 | 3 | 3 |
| B878 | 2010      | This study                        | BSP1   | Sichuan | 30.65 | 104.08 | 2 | 3  | 3 | 3 | 1 | 6 | 1  | 6 | 2 | 3 | 2 | 2 | 4 | 2 | 4 | 6 | 2 | 4  | 2  | 4 | 4 | 4 | 3 | 2 |
| B879 | 2010      | This study                        | BSP1   | Sichuan | 30.65 | 104.08 | 2 | 3  | 3 | 3 | 2 | 5 | 1  | 6 | 3 | 3 | 3 | 2 | 4 | 2 | 4 | 6 | 2 | ND | 4  | 4 | 4 | 4 | 3 | 4 |
| B880 | 2010      | This study                        | BSPint | Sichuan | 30.65 | 104.08 | 2 | 1  | 3 | 3 | 1 | 5 | 1  | 7 | 3 | 5 | 2 | 3 | 4 | 2 | 4 | 4 | 7 | 2  | 3  | 5 | 4 | 4 | 3 | 2 |
| B881 | 2010      | This study                        | BSP1   | Sichuan | 30.65 | 104.08 | 2 | 3  | 3 | 3 | 0 | 5 | 1  | 7 | 2 | 5 | 1 | 3 | 4 | 2 | 4 | 5 | 7 | 2  | 3  | 5 | 3 | 4 | 3 | 2 |
| B882 | 2010      | This study                        | BSP1   | Sichuan | 30.65 | 104.08 | 2 | 3  | 3 | 3 | 1 | 5 | 1  | 7 | 2 | 5 | 2 | 3 | 4 | 2 | 3 | 5 | 5 | 2  | 3  | 7 | 4 | 2 | 3 | 2 |
| B883 | 2010      | This study                        | BSP1   | Sichuan | 30.65 | 104.08 | 2 | 3  | 2 | 3 | 1 | 5 | ND | 7 | 2 | 5 | 1 | 3 | 4 | 2 | 4 | 3 | 9 | 2  | 2  | 5 | 4 | 4 | 3 | 3 |
| B884 | 2010      | This study                        | BSP1   | Sichuan | 30.65 | 104.08 | 2 | 3  | 3 | 3 | 1 | 5 | ND | 7 | 2 | 5 | 3 | 3 | 4 | 2 | 4 | 5 | 0 | ND | ND | 3 | 4 | 4 | 3 | 2 |
| B885 | 2010      | This study                        | BSP1   | Sichuan | 30.65 | 104.08 | 2 | 3  | 3 | 3 | 1 | 5 | 1  | 7 | 2 | 5 | 2 | 3 | 3 | 2 | 4 | 4 | 8 | 3  | ND | 6 | 4 | 2 | 3 | 2 |
| B886 | 2006-2010 | Dong, H. <i>et al.</i> & 22479472 | BSP5   | Tibet   | 29.65 | 91.12  | 2 | 2  | 3 | 3 | 2 | 5 | 1  | 7 | 3 | 5 | 3 | 3 | 4 | 2 | 4 | 6 | 8 | 2  | 4  | 5 | 4 | 4 | 3 | 3 |
| B887 | 2006-2010 | Dong, H. <i>et al.</i> & 22479472 | BSP4   | Tibet   | 29.65 | 91.12  | 2 | ND | 3 | 3 | 1 | 5 | 1  | 7 | 3 | 5 | 3 | 3 | 4 | 2 | 4 | 5 | 7 | 4  | 4  | 4 | 4 | 4 | 3 | 3 |
| B888 | 2006-2010 | Dong, H. <i>et al.</i> & 22479472 | BSP4   | Tibet   | 29.65 | 91.12  | 2 | 2  | 3 | 3 | 2 | 5 | 1  | 7 | 3 | 5 | 3 | 3 | 4 | 2 | 4 | 6 | 7 | 4  | 4  | 4 | 4 | 4 | 3 | 3 |
| B889 | 2006-2010 | Dong, H. <i>et al.</i> & 22479472 | BSP4   | Tibet   | 29.65 | 91.12  | 2 | 2  | 3 | 3 | 2 | 5 | 1  | 7 | 3 | 5 | 3 | 3 | 4 | 2 | 4 | 6 | 7 | 4  | 4  | 4 | 4 | 4 | 3 | 3 |
| B890 | 2006-2010 | Dong, H. <i>et al.</i> & 22479472 | BSP4   | Tibet   | 29.65 | 91.12  | 2 | 2  | 3 | 3 | 1 | 5 | 1  | 7 | 3 | 6 | 3 | 4 | 3 | 2 | 4 | 4 | 7 | 4  | 4  | 4 | 4 | 4 | 3 | 3 |
| B891 | 2006-2010 | Dong, H. <i>et al.</i> & 22479472 | BSP4   | Tibet   | 29.65 | 91.12  | 2 | 2  | 3 | 3 | 2 | 5 | 1  | 7 | 3 | 5 | 3 | 3 | 4 | 2 | 4 | 6 | 7 | 4  | 4  | 4 | 4 | 4 | 3 | 3 |
| B892 | 2006-2010 | Dong, H. <i>et al.</i> & 22479472 | BSP4   | Tibet   | 29.65 | 91.12  | 2 | 2  | 3 | 3 | 1 | 5 | 1  | 7 | 3 | 6 | 3 | 4 | 3 | 2 | 4 | 4 | 7 | 4  | 4  | 4 | 4 | 4 | 3 | 3 |
| B893 | 2006-2010 | Dong, H. <i>et al.</i> & 22479472 | BSP4   | Tibet   | 29.65 | 91.12  | 2 | 2  | 3 | 3 | 2 | 5 | 1  | 7 | 3 | 2 | 3 | 3 | 4 | 2 | 4 | 6 | 7 | 4  | 4  | 4 | 4 | 4 | 2 | 3 |
| B894 | 2006-2010 | Dong, H. <i>et al.</i> & 22479472 | BSP4   | Tibet   | 29.65 | 91.12  | 2 | 2  | 3 | 3 | 2 | 5 | 1  | 7 | 3 | 2 | 3 | 3 | 4 | 2 | 4 | 6 | 7 | 4  | 4  | 4 | 4 | 4 | 3 | 3 |
| B895 | 2006-2010 | Dong, H. <i>et al.</i> & 22479472 | BSP4   | Tibet   | 29.65 | 91.12  | 2 | 2  | 3 | 3 | 2 | 5 | 1  | 7 | 3 | 2 | 3 | 3 | 4 | 2 | 4 | 6 | 7 | 4  | 4  | 4 | 4 | 4 | 3 | 3 |
| B896 | 2006-2010 | Dong, H. <i>et al.</i> & 22479472 | BSP4   | Tibet   | 29.65 | 91.12  | 2 | 2  | 3 | 3 | 1 | 5 | 1  | 7 | 3 | 6 | 3 | 3 | 4 | 2 | 4 | 4 | 7 | 4  | 4  | 4 | 4 | 4 | 3 | 3 |
| B897 | 2006-2010 | Dong, H. <i>et al.</i> & 22479472 | BSP4   | Tibet   | 29.65 | 91.12  | 2 | 2  | 3 | 3 | 2 | 5 | 1  | 7 | 3 | 2 | 3 | 3 | 2 | 2 | 4 | 7 | 7 | 4  | 4  | 4 | 4 | 4 | 3 | 3 |
| B898 | 2006-2010 | Dong, H. <i>et al.</i> & 22479472 | BSP5   | Tibet   | 29.65 | 91.12  | 2 | 4  | 3 | 3 | 2 | 5 | 1  | 6 | 3 | 5 | 3 | 1 | 4 | 2 | 4 | 5 | 8 | 2  | 4  | 4 | 4 | 4 | 3 | 3 |
| B899 | 2006-2010 | Dong, H. <i>et al.</i> & 22479472 | BSP4   | Tibet   | 29.65 | 91.12  | 2 | 2  | 3 | 3 | 2 | 5 | 1  | 4 | 3 | 2 | 3 | 2 | 4 | 2 | 4 | 7 | 7 | 4  | 4  | 4 | 4 | 4 | 3 | 3 |
| B900 | 2006-2010 | Dong, H. <i>et al.</i> & 22479472 | BSP4   | Tibet   | 29.65 | 91.12  | 2 | 2  | 3 | 3 | 2 | 5 | 1  | 7 | 3 | 5 | 3 | 3 | 4 | 2 | 4 | 4 | 7 | 4  | 4  | 4 | 4 | 4 | 3 | 3 |
| B901 | 2006-2010 | Dong, H. <i>et al.</i> & 22479472 | BSP4   | Tibet   | 29.65 | 91.12  | 2 | 2  | 3 | 3 | 1 | 5 | 1  | 7 | 3 | 6 | 3 | 3 | 4 | 2 | 4 | 4 | 7 | 4  | 4  | 4 | 4 | 4 | 3 | 3 |
| B902 | 2006-2010 | Dong, H. <i>et al.</i> & 22479472 | BSP4   | Tibet   | 29.65 | 91.12  | 2 | 2  | 3 | 3 | 1 | 5 | 1  | 7 | 3 | 5 | 3 | 3 | 4 | 2 | 4 | 5 | 7 | 4  | 4  | 4 | 4 | 4 | 3 | 3 |
| B903 | 2006-2010 | Dong, H. <i>et al.</i> & 22479472 | BSP4   | Tibet   | 29.65 | 91.12  | 2 | 2  | 3 | 3 | 2 | 5 | 1  | 7 | 3 | 5 | 3 | 3 | 4 | 2 | 4 | 6 | 7 | 4  | 4  | 4 | 4 | 4 | 3 | 3 |
| B904 | 2006-2010 | Dong, H. <i>et al.</i> & 22479472 | BSP4   | Tibet   | 29.65 | 91.12  | 2 | 2  | 3 | 3 | 2 | 5 | 1  | 7 | 3 | 5 | 3 | 3 | 4 | 2 | 4 | 6 | 7 | 4  | 4  | 4 | 4 | 4 | 3 | 3 |
| B905 | 2006-2010 | Dong, H. <i>et al.</i> & 22479472 | BSP5   | Tibet   | 29.65 | 91.12  | 2 | 2  | 3 | 3 | 2 | 5 | 1  | 8 | 3 | 4 | 3 | 3 | 4 | 2 | 4 | 6 | 7 | 2  | 4  | 5 | 4 | 4 | 3 | 3 |
| B906 | 2006-2010 | Dong, H. <i>et al.</i> & 22479472 | BSP4   | Tibet   | 29.65 | 91.12  | 2 | 2  | 3 | 3 | 2 | 5 | 1  | 7 | 3 | 5 | 3 | 3 | 4 | 2 | 2 | 6 | 7 | 4  | 4  | 4 | 4 | 4 | 3 | 3 |
| B907 | 2006-2010 | Dong, H. <i>et al.</i> & 22479472 | BSP4   | Tibet   | 29.65 | 91.12  | 2 | 2  | 3 | 3 | 2 | 5 | 1  | 7 | 3 | 5 | 3 | 3 | 4 | 2 | 4 | 6 | 7 | 4  | 4  | 4 | 4 | 4 | 3 | 3 |
| B908 | 2006-2010 | Dong, H. <i>et al.</i> & 22479472 | BSP4   | Tibet   | 29.65 | 91.12  | 2 | 2  | 3 | 3 | 1 | 5 | 1  | 7 | 3 | 6 | 3 | 3 | 4 | 2 | 4 | 5 | 7 | 4  | 5  | 4 | 4 | 4 | 3 | 3 |
| B909 | 2006-2010 | Dong, H. <i>et al.</i> & 22479472 | BSP4   | Tibet   | 29.65 | 91.12  | 2 | 2  | 3 | 3 | 2 | 5 | 1  | 7 | 3 | 5 | 3 | 3 | 4 | 2 | 4 | 6 | 7 | 4  | 4  | 4 | 4 | 4 | 3 | 3 |
| B910 | 2006-2010 | Dong, H. <i>et al.</i> & 22479472 | BSP4   | Tibet   | 29.65 | 91.12  | 2 | 2  | 3 | 3 | 1 | 5 | 1  | 7 | 3 | 6 | 3 | 4 | 4 | 2 | 4 | 4 | 7 | 3  | 4  | 4 | 4 | 4 | 3 | 3 |
| B911 | 2006-2010 | Dong, H. <i>et al.</i> & 22479472 | BSP4   | Tibet   | 29.65 | 91.12  | 2 | 2  | 3 | 3 | 2 | 5 | 1  | 7 | 5 | 2 | 3 | 3 | 4 | 2 | 4 | 7 | 7 | 4  | 4  | 4 | 4 | 4 | 3 | 3 |
| B912 | 2006-2010 | Dong, H. <i>et al.</i> & 22479472 | BSP5   | Tibet   | 29.65 | 91.12  | 2 | 2  | 3 | 3 | 2 | 5 | 1  | 6 | 3 | 5 | 3 | 3 | 4 | 2 | 4 | 6 | 9 | 2  | 4  | 6 | 4 | 4 | 3 | 3 |
| B913 | 2006-2010 | Dong, H. <i>et al.</i> & 22479472 | BSP4   | Tibet   | 29.65 | 91.12  | 2 | 2  | 3 | 3 | 1 | 5 | 1  | 7 | 3 | 4 | 3 | 3 | 4 | 2 | 4 | 4 | 7 | 4  | 4  | 4 | 4 | 4 | 3 | 2 |
| B914 | 2006-2010 | Dong, H. <i>et al.</i> & 22479472 | BSP5   | Tibet   | 29.65 | 91.12  | 2 | 2  | 3 | 3 | 2 | 5 | 1  | 8 | 3 | 4 | 3 | 3 | 4 | 2 | 4 | 6 | 7 | 2  | 4  | 5 | 4 | 4 | 3 | 3 |
| B915 | 2006-2010 | Dong, H. <i>et al.</i> & 22479472 | BSP4   | Tibet   | 29.65 | 91.12  | 2 | 2  | 3 | 3 | 1 | 5 | 1  | 7 | 3 | 6 | 4 | 3 | 4 | 2 | 4 | 4 | 7 | 4  | 4  | 4 | 4 | 4 | 3 | 3 |
| B916 | 2006-2010 | Dong, H. <i>et al.</i> & 22479472 | BSP4   | Tibet   | 29.65 | 91.12  | 2 | 2  | 3 | 3 | 1 | 5 | 1  | 8 | 3 | 2 | 3 | 3 | 4 | 2 | 4 | 6 | 7 | 4  | 4  | 4 | 4 | 4 | 3 | 3 |
| B917 | 2006-2010 | Dong, H. <i>et al.</i> & 22479472 | BSP5   | Tibet   | 29.65 | 91.12  | 2 | 2  | 3 | 3 | 2 | 5 | 1  | 7 | 3 | 5 | 3 | 3 | 4 | 2 | 4 | 5 | 7 | 2  | 4  | 5 | 4 | 4 | 3 | 3 |
| B918 | 2006-2010 | Dong, H. <i>et al.</i> & 22479472 | BSP4   | Tibet   | 29.65 | 91.12  | 2 | 2  | 3 | 3 | 2 | 5 | 1  | 8 | 3 | 2 | 3 | 3 | 4 | 2 | 4 | 7 | 7 | 4  | 4  | 4 | 4 | 4 | 3 | 3 |
| B919 | 2006-2010 | Dong, H. <i>et al.</i> &          | BSP4   | Tibet   | 29.65 | 91.12  | 2 | 2  | 3 | 3 | 1 | 5 | 1  | 7 | 3 | 5 | 2 | 3 | 2 | 2 | 4 | 5 | 7 | 4  | 4  | 4 | 4 | 4 | 3 | 3 |







22479472

|       |           |                            |        |       |       |       |   |   |   |   |   |   |   |   |   |   |   |   |   |   |   |   |   |   |   |   |   |   |   |   |
|-------|-----------|----------------------------|--------|-------|-------|-------|---|---|---|---|---|---|---|---|---|---|---|---|---|---|---|---|---|---|---|---|---|---|---|---|
| B1043 | 2006-2010 | Dong, H. et al. & 22479472 | BSP4   | Tibet | 29.65 | 91.12 | 2 | 2 | 3 | 3 | 2 | 5 | 1 | 7 | 3 | 2 | 3 | 3 | 4 | 2 | 4 | 6 | 7 | 2 | 4 | 4 | 4 | 4 | 3 | 3 |
| B1044 | 2006-2010 | Dong, H. et al. & 22479472 | BSP4   | Tibet | 29.65 | 91.12 | 2 | 2 | 3 | 3 | 2 | 5 | 1 | 7 | 3 | 4 | 3 | 3 | 4 | 2 | 4 | 6 | 7 | 4 | 4 | 4 | 4 | 4 | 3 | 3 |
| B1045 | 2006-2010 | Dong, H. et al. & 22479472 | BSP5   | Tibet | 29.65 | 91.12 | 2 | 2 | 3 | 3 | 2 | 5 | 1 | 7 | 3 | 5 | 3 | 3 | 4 | 2 | 3 | 6 | 8 | 2 | 4 | 5 | 4 | 4 | 3 | 2 |
| B1046 | 2006-2010 | Dong, H. et al. & 22479472 | BSPint | Tibet | 29.65 | 91.12 | 2 | 2 | 3 | 3 | 2 | 6 | 1 | 5 | 3 | 4 | 3 | 2 | 4 | 2 | 4 | 5 | 8 | 2 | 1 | 4 | 4 | 4 | 3 | 4 |
| B1047 | 2006-2010 | Dong, H. et al. & 22479472 | BSP5   | Tibet | 29.65 | 91.12 | 2 | 2 | 3 | 2 | 2 | 6 | 1 | 6 | 4 | 4 | 3 | 3 | 4 | 2 | 4 | 6 | 7 | 2 | 4 | 5 | 4 | 4 | 3 | 3 |
| B1048 | 2006-2010 | Dong, H. et al. & 22479472 | BSP4   | Tibet | 29.65 | 91.12 | 2 | 2 | 3 | 2 | 1 | 5 | 1 | 6 | 4 | 4 | 3 | 3 | 4 | 2 | 4 | 5 | 7 | 4 | 4 | 4 | 4 | 4 | 3 | 3 |
| B1049 | 2006-2010 | Dong, H. et al. & 22479472 | BSPint | Tibet | 29.65 | 91.12 | 2 | 2 | 2 | 3 | 2 | 5 | 1 | 4 | 3 | 5 | 3 | 3 | 4 | 2 | 4 | 9 | 8 | 3 | 4 | 4 | 4 | 4 | 3 | 5 |
| B1050 | 2006-2010 | Dong, H. et al. & 22479472 | BSP4   | Tibet | 29.65 | 91.12 | 2 | 2 | 3 | 3 | 2 | 5 | 1 | 6 | 3 | 4 | 3 | 3 | 4 | 2 | 4 | 6 | 7 | 4 | 4 | 4 | 4 | 4 | 3 | 3 |
| B1051 | 2006-2010 | Dong, H. et al. & 22479472 | BSPint | Tibet | 29.65 | 91.12 | 2 | 2 | 3 | 3 | 2 | 5 | 1 | 7 | 3 | 5 | 3 | 3 | 4 | 2 | 4 | 6 | 6 | 2 | 3 | 3 | 4 | 4 | 3 | 3 |
| B1052 | 2006-2010 | Dong, H. et al. & 22479472 | BSP4   | Tibet | 29.65 | 91.12 | 2 | 2 | 3 | 3 | 2 | 5 | 1 | 9 | 3 | 5 | 3 | 3 | 4 | 2 | 4 | 6 | 7 | 4 | 5 | 4 | 4 | 4 | 3 | 3 |
| B1053 | 2006-2010 | Dong, H. et al. & 22479472 | BSP5   | Tibet | 29.65 | 91.12 | 2 | 2 | 3 | 3 | 2 | 5 | 1 | 7 | 3 | 5 | 3 | 3 | 4 | 2 | 4 | 9 | 8 | 2 | 4 | 5 | 4 | 4 | 3 | 3 |
| B1054 | 2006-2010 | Dong, H. et al. & 22479472 | BSP4   | Tibet | 29.65 | 91.12 | 2 | 2 | 3 | 3 | 1 | 5 | 1 | 7 | 3 | 5 | 3 | 3 | 4 | 2 | 4 | 4 | 7 | 4 | 4 | 4 | 4 | 4 | 3 | 2 |
| B1055 | 2006-2010 | Dong, H. et al. & 22479472 | BSP4   | Tibet | 29.65 | 91.12 | 2 | 2 | 3 | 2 | 2 | 5 | 1 | 7 | 3 | 5 | 3 | 1 | 4 | 2 | 4 | 6 | 2 | 4 | 4 | 4 | 4 | 4 | 3 | 3 |
| B1056 | 2006-2010 | Dong, H. et al. & 22479472 | BSP4   | Tibet | 29.65 | 91.12 | 2 | 2 | 3 | 3 | 2 | 5 | 1 | 8 | 3 | 5 | 3 | 3 | 4 | 2 | 4 | 6 | 7 | 4 | 4 | 4 | 4 | 4 | 3 | 3 |
| B1057 | 2006-2010 | Dong, H. et al. & 22479472 | BSP4   | Tibet | 29.65 | 91.12 | 2 | 2 | 3 | 3 | 2 | 5 | 1 | 7 | 3 | 5 | 3 | 3 | 4 | 2 | 4 | 6 | 7 | 4 | 3 | 4 | 4 | 4 | 3 | 3 |
| B1058 | 2006-2010 | Dong, H. et al. & 22479472 | BSPint | Tibet | 29.65 | 91.12 | 2 | 2 | 2 | 3 | 1 | 5 | 1 | 6 | 3 | 5 | 3 | 3 | 4 | 2 | 4 | 6 | 7 | 2 | 3 | 5 | 4 | 4 | 3 | 3 |
| B1059 | 2006-2010 | Dong, H. et al. & 22479472 | BSP4   | Tibet | 29.65 | 91.12 | 2 | 2 | 3 | 3 | 2 | 5 | 1 | 7 | 3 | 2 | 3 | 3 | 4 | 2 | 4 | 7 | 6 | 4 | 4 | 4 | 4 | 4 | 3 | 3 |
| B1060 | 2006-2010 | Dong, H. et al. & 22479472 | BSPint | Tibet | 29.65 | 91.12 | 2 | 2 | 3 | 4 | 2 | 5 | 1 | 6 | 3 | 4 | 2 | 3 | 4 | 2 | 4 | 6 | 7 | 3 | 3 | 4 | 4 | 4 | 3 | 3 |
| B1061 | 2006-2010 | Dong, H. et al. & 22479472 | BSP4   | Tibet | 29.65 | 91.12 | 2 | 2 | 3 | 3 | 1 | 5 | 1 | 7 | 3 | 6 | 3 | 3 | 3 | 2 | 4 | 4 | 7 | 4 | 4 | 5 | 4 | 4 | 3 | 3 |
| B1062 | 2006-2010 | Dong, H. et al. & 22479472 | BSP4   | Tibet | 29.65 | 91.12 | 2 | 2 | 3 | 3 | 1 | 5 | 1 | 7 | 3 | 6 | 3 | 3 | 4 | 2 | 4 | 3 | 8 | 4 | 4 | 4 | 4 | 4 | 2 | 3 |
| B1063 | 2006-2010 | Dong, H. et al. & 22479472 | BSP5   | Tibet | 29.65 | 91.12 | 2 | 2 | 3 | 3 | 2 | 5 | 1 | 7 | 3 | 4 | 3 | 3 | 4 | 2 | 4 | 6 | 8 | 2 | 4 | 5 | 4 | 4 | 3 | 3 |
| B1064 | 2006-2010 | Dong, H. et al. & 22479472 | BSP4   | Tibet | 29.65 | 91.12 | 2 | 2 | 3 | 3 | 1 | 5 | 1 | 7 | 3 | 6 | 3 | 3 | 4 | 2 | 4 | 4 | 7 | 2 | 4 | 4 | 4 | 4 | 3 | 3 |
| B1065 | 2006-2010 | Dong, H. et al. & 22479472 | BSP5   | Tibet | 29.65 | 91.12 | 2 | 2 | 3 | 3 | 2 | 5 | 1 | 7 | 3 | 6 | 3 | 2 | 4 | 2 | 4 | 6 | 7 | 2 | 4 | 5 | 4 | 4 | 3 | 3 |
| B1066 | 2006-2010 | Dong, H. et al. & 22479472 | BSP4   | Tibet | 29.65 | 91.12 | 2 | 2 | 3 | 3 | 1 | 5 | 1 | 7 | 3 | 4 | 3 | 3 | 4 | 2 | 4 | 5 | 7 | 4 | 4 | 4 | 4 | 4 | 3 | 3 |
| B1067 | 2006-2010 | Dong, H. et al. & 22479472 | BSP4   | Tibet | 29.65 | 91.12 | 2 | 2 | 3 | 3 | 1 | 5 | 1 | 7 | 3 | 6 | 3 | 3 | 4 | 2 | 4 | 4 | 7 | 4 | 4 | 4 | 4 | 4 | 3 | 3 |
| B1068 | 2006-2010 | Dong, H. et al. & 22479472 | BSP4   | Tibet | 29.65 | 91.12 | 2 | 2 | 3 | 3 | 2 | 5 | 1 | 7 | 3 | 5 | 3 | 3 | 4 | 2 | 4 | 6 | 7 | 4 | 4 | 4 | 4 | 4 | 3 | 3 |
| B1069 | 2006-2010 | Dong, H. et al. & 22479472 | BSP4   | Tibet | 29.65 | 91.12 | 2 | 2 | 3 | 3 | 1 | 5 | 1 | 7 | 3 | 5 | 3 | 2 | 4 | 2 | 4 | 5 | 7 | 4 | 4 | 4 | 4 | 4 | 3 | 3 |
| B1070 | 2006-2010 | Dong, H. et al. & 22479472 | BSP5   | Tibet | 29.65 | 91.12 | 2 | 2 | 3 | 3 | 2 | 5 | 1 | 7 | 3 | 5 | 3 | 3 | 4 | 2 | 4 | 5 | 7 | 2 | 4 | 5 | 4 | 4 | 3 | 3 |
| B1071 | 2006-2010 | Dong, H. et al. & 22479472 | BSP4   | Tibet | 29.65 | 91.12 | 2 | 2 | 3 | 3 | 2 | 5 | 1 | 8 | 3 | 5 | 4 | 3 | 4 | 2 | 4 | 6 | 8 | 4 | 3 | 4 | 4 | 4 | 3 | 3 |
| B1072 | 2006-2010 | Dong, H. et al. & 22479472 | BSP4   | Tibet | 29.65 | 91.12 | 2 | 2 | 3 | 3 | 2 | 5 | 1 | 8 | 3 | 5 | 4 | 3 | 4 | 2 | 4 | 6 | 8 | 4 | 3 | 4 | 4 | 4 | 3 | 3 |
| B1073 | 2006-2010 | Dong, H. et al. & 22479472 | BSP4   | Tibet | 29.65 | 91.12 | 2 | 2 | 3 | 3 | 2 | 5 | 1 | 7 | 3 | 5 | 3 | 3 | 4 | 2 | 4 | 5 | 7 | 4 | 4 | 4 | 4 | 4 | 3 | 3 |
| B1074 | 2006-2010 | Dong, H. et al. & 22479472 | BSP5   | Tibet | 29.65 | 91.12 | 2 | 2 | 3 | 3 | 2 | 5 | 1 | 5 | 3 | 5 | 3 | 2 | 4 | 2 | 4 | 6 | 8 | 2 | 4 | 5 | 4 | 4 | 3 | 3 |
| B1075 | 2006-2010 | Dong, H. et al. & 22479472 | BSP4   | Tibet | 29.65 | 91.12 | 2 | 2 | 3 | 3 | 2 | 5 | 1 | 7 | 3 | 5 | 3 | 3 | 4 | 2 | 4 | 6 | 7 | 4 | 4 | 4 | 4 | 4 | 3 | 3 |
| B1076 | 2006-2010 | Dong, H. et al. & 22479472 | BSP5   | Tibet | 29.65 | 91.12 | 2 | 2 | 3 | 3 | 2 | 5 | 1 | 7 | 3 | 4 | 3 | 3 | 4 | 2 | 4 | 4 | 8 | 2 | 4 | 5 | 4 | 4 | 3 | 4 |
| B1077 | 2006-2010 | Dong, H. et al. & 22479472 | BSP4   | Tibet | 29.65 | 91.12 | 2 | 2 | 3 | 3 | 2 | 5 | 1 | 7 | 3 | 2 | 2 | 3 | 4 | 2 | 4 | 6 | 7 | 4 | 4 | 4 | 4 | 4 | 3 | 3 |
| B1078 | 2006-2010 | Dong, H. et al. & 22479472 | BSP5   | Tibet | 29.65 | 91.12 | 2 | 2 | 3 | 3 | 2 | 5 | 1 | 8 | 3 | 4 | 2 | 3 | 4 | 2 | 4 | 6 | 7 | 2 | 4 | 5 | 4 | 4 | 3 | 3 |
| B1079 | 2006-2010 | Dong, H. et al. & 22479472 | BSP4   | Tibet | 29.65 | 91.12 | 2 | 2 | 3 | 3 | 1 | 5 | 1 | 7 | 3 | 5 | 3 | 2 | 4 | 2 | 4 | 5 | 7 | 4 | 4 | 4 | 4 | 4 | 3 | 3 |
| B1080 | 2006-2010 | Dong, H. et al. & 22479472 | BSP4   | Tibet | 29.65 | 91.12 | 2 | 2 | 3 | 3 | 1 | 5 | 1 | 7 | 3 | 6 | 3 | 3 | 4 | 2 | 4 | 4 | 7 | 4 | 4 | 4 | 4 | 4 | 3 | 3 |
| B1081 | 2006-2010 | Dong, H. et al. & 22479472 | BSP4   | Tibet | 29.65 | 91.12 | 2 | 2 | 3 | 3 | 2 | 5 | 1 | 7 | 3 | 2 | 3 | 3 | 4 | 2 | 4 | 6 | 7 | 4 | 4 | 4 | 4 | 4 | 3 | 3 |
| B1082 | 2006-2010 | Dong, H. et al. & 22479472 | BSP4   | Tibet | 29.65 | 91.12 | 2 | 2 | 3 | 3 | 1 | 5 | 1 | 7 | 3 | 4 | 3 | 3 | 4 | 2 | 4 | 5 | 7 | 4 | 4 | 4 | 4 | 4 | 3 | 3 |
| B1083 | 2006-2010 | Dong, H. et al. &          | BSP5   | Tibet | 29.65 | 91.12 | 2 | 2 | 3 | 3 | 2 | 5 | 1 | 8 | 3 | 4 | 3 | 3 | 4 | 2 | 4 | 4 | 7 | 2 | 4 | 5 | 4 | 4 | 3 | 3 |



22479472

|       |           |                                   |        |       |       |       |   |   |   |   |   |   |   |   |   |   |   |   |   |   |   |   |    |   |   |   |   |   |   |   |
|-------|-----------|-----------------------------------|--------|-------|-------|-------|---|---|---|---|---|---|---|---|---|---|---|---|---|---|---|---|----|---|---|---|---|---|---|---|
| B1125 | 2006-2010 | Dong, H. <i>et al.</i> & 22479472 | BSP4   | Tibet | 29.65 | 91.12 | 2 | 2 | 3 | 3 | 2 | 5 | 1 | 7 | 3 | 2 | 4 | 3 | 4 | 2 | 4 | 7 | 7  | 4 | 4 | 4 | 4 | 4 | 3 | 3 |
| B1126 | 2006-2010 | Dong, H. <i>et al.</i> & 22479472 | BSP4   | Tibet | 29.65 | 91.12 | 2 | 2 | 3 | 3 | 1 | 5 | 1 | 7 | 3 | 5 | 3 | 3 | 5 | 2 | 4 | 5 | 7  | 4 | 4 | 4 | 4 | 4 | 3 | 3 |
| B1127 | 2006-2010 | Dong, H. <i>et al.</i> & 22479472 | BSP4   | Tibet | 29.65 | 91.12 | 2 | 2 | 3 | 3 | 1 | 5 | 1 | 7 | 3 | 5 | 3 | 3 | 4 | 2 | 4 | 5 | 7  | 4 | 4 | 4 | 4 | 4 | 3 | 3 |
| B1128 | 2006-2010 | Dong, H. <i>et al.</i> & 22479472 | BSP4   | Tibet | 29.65 | 91.12 | 2 | 2 | 3 | 3 | 2 | 5 | 1 | 7 | 3 | 2 | 3 | 3 | 4 | 2 | 4 | 7 | 7  | 4 | 3 | 4 | 4 | 4 | 3 | 3 |
| B1129 | 2006-2010 | Dong, H. <i>et al.</i> & 22479472 | BSP4   | Tibet | 29.65 | 91.12 | 2 | 3 | 3 | 3 | 1 | 5 | 1 | 7 | 3 | 5 | 3 | 3 | 4 | 2 | 4 | 4 | 5  | 4 | 4 | 4 | 4 | 4 | 3 | 3 |
| B1130 | 2006-2010 | Dong, H. <i>et al.</i> & 22479472 | BSP4   | Tibet | 29.65 | 91.12 | 2 | 1 | 3 | 3 | 1 | 5 | 1 | 7 | 3 | 2 | 3 | 3 | 4 | 2 | 4 | 6 | 7  | 4 | 4 | 4 | 4 | 4 | 3 | 3 |
| B1131 | 2006-2010 | Dong, H. <i>et al.</i> & 22479472 | BSP4   | Tibet | 29.65 | 91.12 | 2 | 3 | 3 | 3 | 2 | 5 | 1 | 7 | 3 | 5 | 3 | 3 | 4 | 2 | 4 | 6 | 7  | 4 | 4 | 4 | 4 | 4 | 3 | 3 |
| B1132 | 2006-2010 | Dong, H. <i>et al.</i> & 22479472 | BSP5   | Tibet | 29.65 | 91.12 | 2 | 1 | 3 | 3 | 2 | 5 | 1 | 7 | 3 | 5 | 3 | 3 | 4 | 2 | 4 | 5 | 7  | 2 | 4 | 5 | 4 | 4 | 3 | 3 |
| B1133 | 2006-2010 | Dong, H. <i>et al.</i> & 22479472 | BSP4   | Tibet | 29.65 | 91.12 | 2 | 2 | 3 | 3 | 1 | 5 | 1 | 7 | 3 | 4 | 3 | 3 | 4 | 2 | 4 | 5 | 7  | 4 | 4 | 4 | 4 | 4 | 3 | 3 |
| B1134 | 2006-2010 | Dong, H. <i>et al.</i> & 22479472 | BSP4   | Tibet | 29.65 | 91.12 | 2 | 2 | 3 | 3 | 1 | 5 | 1 | 7 | 4 | 5 | 3 | 3 | 4 | 2 | 4 | 4 | 7  | 4 | 4 | 4 | 4 | 4 | 3 | 2 |
| B1135 | 2006-2010 | Dong, H. <i>et al.</i> & 22479472 | BSP5   | Tibet | 29.65 | 91.12 | 2 | 2 | 3 | 3 | 2 | 5 | 1 | 5 | 3 | 5 | 3 | 3 | 4 | 2 | 4 | 6 | 8  | 2 | 4 | 5 | 4 | 4 | 3 | 3 |
| B1136 | 2006-2010 | Dong, H. <i>et al.</i> & 22479472 | BSP1   | Tibet | 29.65 | 91.12 | 2 | 2 | 2 | 3 | 2 | 5 | 1 | 5 | 4 | 3 | 3 | 3 | 4 | 1 | 4 | 4 | 8  | 2 | 2 | 3 | 4 | 2 | 3 | 4 |
| B1137 | 2006-2010 | Dong, H. <i>et al.</i> & 22479472 | BSP4   | Tibet | 29.65 | 91.12 | 2 | 2 | 3 | 3 | 2 | 5 | 1 | 7 | 3 | 5 | 2 | 3 | 4 | 2 | 4 | 6 | 7  | 4 | 4 | 4 | 4 | 4 | 3 | 3 |
| B1138 | 2006-2010 | Dong, H. <i>et al.</i> & 22479472 | BSP4   | Tibet | 29.65 | 91.12 | 2 | 2 | 3 | 3 | 2 | 5 | 1 | 7 | 3 | 2 | 3 | 3 | 4 | 2 | 4 | 7 | 7  | 4 | 4 | 4 | 4 | 4 | 3 | 3 |
| B1139 | 2006-2010 | Dong, H. <i>et al.</i> & 22479472 | BSP4   | Tibet | 29.65 | 91.12 | 2 | 2 | 3 | 3 | 1 | 5 | 1 | 7 | 3 | 6 | 3 | 4 | 4 | 2 | 4 | 5 | 7  | 1 | 4 | 4 | 4 | 4 | 3 | 3 |
| B1140 | 2006-2010 | Dong, H. <i>et al.</i> & 22479472 | BSP4   | Tibet | 29.65 | 91.12 | 2 | 2 | 3 | 3 | 2 | 5 | 1 | 8 | 3 | 5 | 3 | 3 | 3 | 2 | 4 | 6 | 7  | 4 | 4 | 4 | 4 | 4 | 3 | 3 |
| B1141 | 2006-2010 | Dong, H. <i>et al.</i> & 22479472 | BSP4   | Tibet | 29.65 | 91.12 | 2 | 2 | 3 | 3 | 1 | 6 | 1 | 7 | 3 | 5 | 2 | 3 | 4 | 2 | 4 | 9 | 7  | 2 | 4 | 4 | 4 | 4 | 3 | 3 |
| B1142 | 2006-2010 | Dong, H. <i>et al.</i> & 22479472 | BSP4   | Tibet | 29.65 | 91.12 | 2 | 2 | 3 | 3 | 1 | 5 | 1 | 7 | 3 | 5 | 3 | 3 | 4 | 2 | 4 | 5 | 6  | 4 | 4 | 4 | 4 | 4 | 3 | 3 |
| B1143 | 2006-2010 | Dong, H. <i>et al.</i> & 22479472 | BSPint | Tibet | 29.65 | 91.12 | 2 | 2 | 2 | 3 | 2 | 5 | 1 | 3 | 3 | 6 | 3 | 3 | 4 | 2 | 4 | 5 | 6  | 3 | 4 | 4 | 4 | 4 | 3 | 5 |
| B1144 | 2006-2010 | Dong, H. <i>et al.</i> & 22479472 | BSP5   | Tibet | 29.65 | 91.12 | 2 | 2 | 3 | 3 | 2 | 5 | 1 | 7 | 3 | 4 | 3 | 3 | 4 | 2 | 4 | 6 | 7  | 2 | 4 | 5 | 4 | 4 | 3 | 3 |
| B1145 | 2006-2010 | Dong, H. <i>et al.</i> & 22479472 | BSP5   | Tibet | 29.65 | 91.12 | 2 | 2 | 3 | 3 | 2 | 5 | 1 | 6 | 3 | 5 | 3 | 3 | 4 | 2 | 4 | 6 | 8  | 2 | 4 | 6 | 4 | 4 | 3 | 3 |
| B1146 | 2006-2010 | Dong, H. <i>et al.</i> & 22479472 | BSP4   | Tibet | 29.65 | 91.12 | 2 | 2 | 3 | 3 | 1 | 5 | 1 | 7 | 3 | 6 | 2 | 3 | 4 | 2 | 4 | 4 | 7  | 4 | 4 | 4 | 4 | 4 | 3 | 3 |
| B1147 | 2006-2010 | Dong, H. <i>et al.</i> & 22479472 | BSPint | Tibet | 29.65 | 91.12 | 2 | 2 | 3 | 3 | 2 | 5 | 1 | 7 | 3 | 5 | 3 | 3 | 4 | 2 | 4 | 6 | 7  | 2 | 4 | 4 | 4 | 4 | 3 | 3 |
| B1148 | 2006-2010 | Dong, H. <i>et al.</i> & 22479472 | BSP5   | Tibet | 29.65 | 91.12 | 2 | 2 | 3 | 3 | 2 | 5 | 1 | 7 | 3 | 6 | 3 | 3 | 4 | 2 | 3 | 6 | 8  | 2 | 4 | 5 | 4 | 4 | 3 | 2 |
| B1149 | 2006-2010 | Dong, H. <i>et al.</i> & 22479472 | BSP4   | Tibet | 29.65 | 91.12 | 2 | 2 | 3 | 3 | 1 | 5 | 1 | 7 | 3 | 2 | 3 | 2 | 4 | 2 | 4 | 6 | 7  | 4 | 4 | 4 | 4 | 4 | 3 | 3 |
| B1150 | 2006-2010 | Dong, H. <i>et al.</i> & 22479472 | BSP4   | Tibet | 29.65 | 91.12 | 2 | 2 | 3 | 3 | 1 | 5 | 1 | 7 | 3 | 5 | 3 | 3 | 4 | 2 | 3 | 5 | 7  | 2 | 4 | 4 | 4 | 4 | 3 | 3 |
| B1151 | 2006-2010 | Dong, H. <i>et al.</i> & 22479472 | BSP4   | Tibet | 29.65 | 91.12 | 2 | 2 | 3 | 3 | 2 | 5 | 1 | 7 | 3 | 2 | 3 | 3 | 4 | 2 | 4 | 7 | 7  | 4 | 4 | 4 | 4 | 4 | 3 | 3 |
| B1152 | 2006-2010 | Dong, H. <i>et al.</i> & 22479472 | BSP4   | Tibet | 29.65 | 91.12 | 2 | 2 | 3 | 3 | 1 | 5 | 1 | 7 | 3 | 5 | 3 | 3 | 4 | 3 | 4 | 5 | 7  | 4 | 4 | 3 | 4 | 4 | 3 | 3 |
| B1153 | 2006-2010 | Dong, H. <i>et al.</i> & 22479472 | BSP5   | Tibet | 29.65 | 91.12 | 2 | 1 | 3 | 3 | 2 | 5 | 1 | 7 | 3 | 5 | 3 | 3 | 4 | 2 | 4 | 6 | 8  | 2 | 4 | 5 | 4 | 4 | 3 | 3 |
| B1154 | 2006-2010 | Dong, H. <i>et al.</i> & 22479472 | BSP4   | Tibet | 29.65 | 91.12 | 2 | 2 | 3 | 4 | 2 | 5 | 1 | 6 | 3 | 5 | 3 | 3 | 4 | 2 | 4 | 7 | 7  | 4 | 4 | 4 | 4 | 4 | 3 | 3 |
| B1155 | 2006-2010 | Dong, H. <i>et al.</i> & 22479472 | BSP5   | Tibet | 29.65 | 91.12 | 2 | 2 | 3 | 3 | 2 | 5 | 1 | 7 | 3 | 4 | 3 | 3 | 4 | 2 | 4 | 5 | 7  | 2 | 4 | 5 | 4 | 4 | 3 | 3 |
| B1156 | 2006-2010 | Dong, H. <i>et al.</i> & 22479472 | BSP4   | Tibet | 29.65 | 91.12 | 2 | 2 | 3 | 3 | 1 | 5 | 1 | 7 | 3 | 5 | 3 | 3 | 4 | 2 | 4 | 4 | 6  | 2 | 4 | 4 | 4 | 4 | 3 | 2 |
| B1157 | 2006-2010 | Dong, H. <i>et al.</i> & 22479472 | BSP5   | Tibet | 29.65 | 91.12 | 2 | 2 | 3 | 3 | 2 | 5 | 1 | 8 | 3 | 6 | 3 | 3 | 4 | 2 | 3 | 6 | 8  | 2 | 4 | 5 | 4 | 4 | 3 | 2 |
| B1158 | 2006-2010 | Dong, H. <i>et al.</i> & 22479472 | BSP4   | Tibet | 29.65 | 91.12 | 2 | 2 | 3 | 3 | 2 | 5 | 1 | 7 | 2 | 5 | 3 | 3 | 4 | 2 | 4 | 5 | ND | 4 | 4 | 4 | 4 | 4 | 3 | 3 |
| B1159 | 2006-2010 | Dong, H. <i>et al.</i> & 22479472 | BSP1   | Tibet | 29.65 | 91.12 | 2 | 2 | 2 | 3 | 2 | 5 | 1 | 5 | 3 | 3 | 3 | 3 | 3 | 1 | 4 | 3 | 8  | 2 | 2 | 3 | 4 | 2 | 3 | 4 |
| B1160 | 2006-2010 | Dong, H. <i>et al.</i> & 22479472 | BSP5   | Tibet | 29.65 | 91.12 | 2 | 1 | 3 | 2 | 2 | 5 | 1 | 7 | 3 | 5 | 2 | 3 | 4 | 2 | 4 | 3 | 8  | 2 | 3 | 5 | 4 | 4 | 3 | 3 |
| B1161 | 2006-2010 | Dong, H. <i>et al.</i> & 22479472 | BSP4   | Tibet | 29.65 | 91.12 | 2 | 2 | 3 | 2 | 1 | 5 | 1 | 7 | 3 | 6 | 2 | 3 | 4 | 2 | 4 | 3 | 8  | 2 | 4 | 4 | 4 | 4 | 2 | 3 |
| B1162 | 2006-2010 | Dong, H. <i>et al.</i> & 22479472 | BSP4   | Tibet | 29.65 | 91.12 | 2 | 2 | 3 | 2 | 1 | 5 | 1 | 7 | 3 | 5 | 3 | 3 | 2 | 2 | 4 | 5 | 7  | 2 | 4 | 4 | 4 | 4 | 3 | 3 |
| B1163 | 2006-2010 | Dong, H. <i>et al.</i> & 22479472 | BSP5   | Tibet | 29.65 | 91.12 | 2 | 2 | 3 | 3 | 2 | 5 | 1 | 5 | 3 | 5 | 3 | 4 | 4 | 2 | 4 | 6 | 8  | 2 | 4 | 5 | 4 | 4 | 3 | 3 |
| B1164 | 2006-2010 | Dong, H. <i>et al.</i> & 22479472 | BSPint | Tibet | 29.65 | 91.12 | 2 | 2 | 3 | 3 | 1 | 5 | 1 | 7 | 3 | 5 | 3 | 3 | 4 | 2 | 4 | 6 | 1  | 2 | 4 | 5 | 4 | 4 | 3 | 3 |
| B1165 | 2006-2010 | Dong, H. <i>et al.</i> &          | BSP5   | Tibet | 29.65 | 91.12 | 2 | 2 | 3 | 3 | 2 | 5 | 1 | 6 | 3 | 5 | 3 | 3 | 4 | 2 | 3 | 6 | 8  | 2 | 4 | 5 | 4 | 4 | 3 | 3 |







22479472

|       |           |                                   |        |       |       |       |   |   |   |   |   |   |   |    |   |   |   |   |   |   |   |   |   |   |   |   |   |   |   |   |
|-------|-----------|-----------------------------------|--------|-------|-------|-------|---|---|---|---|---|---|---|----|---|---|---|---|---|---|---|---|---|---|---|---|---|---|---|---|
| B1248 | 2006-2010 | Dong, H. <i>et al.</i> & 22479472 | BSP4   | Tibet | 29.65 | 91.12 | 2 | 2 | 3 | 3 | 1 | 5 | 1 | 7  | 3 | 5 | 3 | 3 | 2 | 2 | 4 | 4 | 8 | 4 | 4 | 4 | 4 | 4 | 3 | 3 |
| B1249 | 2006-2010 | Dong, H. <i>et al.</i> & 22479472 | BSP4   | Tibet | 29.65 | 91.12 | 2 | 2 | 3 | 3 | 2 | 5 | 1 | 7  | 2 | 5 | 3 | 3 | 4 | 2 | 4 | 6 | 7 | 4 | 4 | 4 | 4 | 4 | 3 | 4 |
| B1250 | 2006-2010 | Dong, H. <i>et al.</i> & 22479472 | BSP4   | Tibet | 29.65 | 91.12 | 2 | 2 | 3 | 4 | 1 | 5 | 1 | 7  | 3 | 5 | 3 | 2 | 4 | 2 | 4 | 5 | 7 | 4 | 4 | 4 | 4 | 4 | 3 | 3 |
| B1251 | 2006-2010 | Dong, H. <i>et al.</i> & 22479472 | BSP5   | Tibet | 29.65 | 91.12 | 2 | 2 | 3 | 3 | 2 | 5 | 1 | 8  | 3 | 4 | 3 | 3 | 4 | 2 | 4 | 6 | 7 | 2 | 4 | 5 | 4 | 4 | 3 | 3 |
| B1252 | 2006-2010 | Dong, H. <i>et al.</i> & 22479472 | BSP4   | Tibet | 29.65 | 91.12 | 2 | 2 | 3 | 4 | 2 | 5 | 1 | 7  | 3 | 2 | 3 | 3 | 4 | 2 | 4 | 6 | 7 | 4 | 4 | 4 | 4 | 4 | 3 | 5 |
| B1253 | 2006-2010 | Dong, H. <i>et al.</i> & 22479472 | BSP4   | Tibet | 29.65 | 91.12 | 2 | 2 | 3 | 3 | 1 | 5 | 1 | 7  | 3 | 6 | 3 | 3 | 4 | 2 | 4 | 4 | 8 | 4 | 4 | 4 | 4 | 4 | 3 | 3 |
| B1254 | 2006-2010 | Dong, H. <i>et al.</i> & 22479472 | BSPint | Tibet | 29.65 | 91.12 | 2 | 2 | 3 | 3 | 2 | 5 | 1 | 6  | 3 | 4 | 3 | 3 | 4 | 2 | 4 | 4 | 6 | 3 | 3 | 4 | 4 | 4 | 3 | 3 |
| B1255 | 2006-2010 | Dong, H. <i>et al.</i> & 22479472 | BSP4   | Tibet | 29.65 | 91.12 | 2 | 2 | 3 | 3 | 2 | 5 | 1 | 7  | 2 | 5 | 3 | 3 | 4 | 2 | 4 | 6 | 7 | 4 | 4 | 4 | 4 | 4 | 3 | 4 |
| B1256 | 2006-2010 | Dong, H. <i>et al.</i> & 22479472 | BSP4   | Tibet | 29.65 | 91.12 | 2 | 2 | 3 | 3 | 2 | 5 | 1 | 7  | 3 | 5 | 3 | 3 | 4 | 2 | 4 | 6 | 7 | 4 | 4 | 4 | 4 | 4 | 3 | 3 |
| B1257 | 2006-2010 | Dong, H. <i>et al.</i> & 22479472 | BSP5   | Tibet | 29.65 | 91.12 | 2 | 4 | 3 | 3 | 2 | 5 | 1 | 6  | 3 | 5 | 3 | 1 | 4 | 2 | 4 | 6 | 8 | 2 | 4 | 4 | 4 | 4 | 3 | 3 |
| B1258 | 2006-2010 | Dong, H. <i>et al.</i> & 22479472 | BSP5   | Tibet | 29.65 | 91.12 | 2 | 2 | 3 | 3 | 2 | 5 | 1 | 7  | 3 | 5 | 3 | 3 | 4 | 2 | 4 | 5 | 7 | 2 | 4 | 5 | 4 | 4 | 3 | 3 |
| B1259 | 2006-2010 | Dong, H. <i>et al.</i> & 22479472 | BSP4   | Tibet | 29.65 | 91.12 | 2 | 2 | 3 | 3 | 2 | 5 | 1 | ND | 3 | 5 | 3 | 3 | 4 | 2 | 4 | 7 | 8 | 4 | 4 | 4 | 4 | 4 | 3 | 3 |
| B1260 | 2006-2010 | Dong, H. <i>et al.</i> & 22479472 | BSP1   | Tibet | 29.65 | 91.12 | 2 | 2 | 2 | 3 | 2 | 5 | 1 | 4  | 3 | 3 | 2 | 4 | 3 | 1 | 4 | 3 | 7 | 2 | 2 | 3 | 4 | 2 | 3 | 5 |
| B1261 | 2006-2010 | Dong, H. <i>et al.</i> & 22479472 | BSP4   | Tibet | 29.65 | 91.12 | 2 | 2 | 3 | 3 | 1 | 5 | 1 | 7  | 3 | 5 | 3 | 3 | 4 | 2 | 4 | 4 | 7 | 4 | 4 | 4 | 4 | 4 | 3 | 2 |
| B1262 | 2006-2010 | Dong, H. <i>et al.</i> & 22479472 | BSP5   | Tibet | 29.65 | 91.12 | 2 | 2 | 3 | 3 | 2 | 5 | 1 | 7  | 3 | 5 | 3 | 3 | 4 | 2 | 4 | 5 | 8 | 2 | 4 | 5 | 4 | 4 | 3 | 3 |
| B1263 | 2006-2010 | Dong, H. <i>et al.</i> & 22479472 | BSP5   | Tibet | 29.65 | 91.12 | 2 | 2 | 3 | 3 | 2 | 5 | 1 | 7  | 3 | 5 | 3 | 3 | 4 | 2 | 4 | 5 | 8 | 2 | 4 | 5 | 4 | 4 | 3 | 3 |
| B1264 | 2006-2010 | Dong, H. <i>et al.</i> & 22479472 | BSP5   | Tibet | 29.65 | 91.12 | 2 | 2 | 3 | 3 | 2 | 5 | 1 | 7  | 3 | 5 | 3 | 3 | 4 | 2 | 4 | 5 | 8 | 2 | 4 | 5 | 4 | 4 | 3 | 3 |
| B1265 | 2006-2010 | Dong, H. <i>et al.</i> & 22479472 | BSP1   | Tibet | 29.65 | 91.12 | 2 | 2 | 3 | 3 | 2 | 6 | 1 | 6  | 3 | 4 | 3 | 2 | 4 | 2 | 4 | 5 | 8 | 2 | 1 | 4 | 4 | 4 | 3 | 4 |
| B1266 | 2006-2010 | Dong, H. <i>et al.</i> & 22479472 | BSP4   | Tibet | 29.65 | 91.12 | 2 | 2 | 3 | 3 | 2 | 5 | 1 | 7  | 3 | 5 | 3 | 3 | 4 | 2 | 4 | 6 | 7 | 4 | 4 | 4 | 4 | 4 | 3 | 3 |
| B1267 | 2006-2010 | Dong, H. <i>et al.</i> & 22479472 | BSP4   | Tibet | 29.65 | 91.12 | 2 | 2 | 3 | 3 | 1 | 5 | 1 | 7  | 3 | 5 | 3 | 3 | 4 | 2 | 4 | 4 | 7 | 4 | 4 | 4 | 4 | 4 | 3 | 3 |
| B1268 | 2006-2010 | Dong, H. <i>et al.</i> & 22479472 | BSP4   | Tibet | 29.65 | 91.12 | 2 | 2 | 3 | 4 | 2 | 5 | 1 | 6  | 3 | 5 | 3 | 3 | 4 | 2 | 4 | 7 | 7 | 4 | 4 | 4 | 4 | 4 | 3 | 3 |
| B1269 | 2006-2010 | Dong, H. <i>et al.</i> & 22479472 | BSP4   | Tibet | 29.65 | 91.12 | 2 | 2 | 3 | 3 | 2 | 6 | 1 | 7  | 3 | 2 | 3 | 3 | 4 | 2 | 4 | 6 | 7 | 4 | 4 | 4 | 4 | 4 | 3 | 3 |
| B1270 | 2006-2010 | Dong, H. <i>et al.</i> & 22479472 | BSP4   | Tibet | 29.65 | 91.12 | 2 | 2 | 3 | 3 | 2 | 5 | 1 | 4  | 3 | 5 | 3 | 3 | 4 | 2 | 4 | 6 | 7 | 4 | 4 | 4 | 4 | 4 | 3 | 3 |
| B1271 | 2006-2010 | Dong, H. <i>et al.</i> & 22479472 | BSP4   | Tibet | 29.65 | 91.12 | 2 | 2 | 3 | 3 | 2 | 5 | 1 | 7  | 3 | 5 | 3 | 3 | 4 | 2 | 4 | 6 | 7 | 4 | 4 | 4 | 4 | 4 | 3 | 3 |
| B1272 | 2006-2010 | Dong, H. <i>et al.</i> & 22479472 | BSP4   | Tibet | 29.65 | 91.12 | 2 | 2 | 3 | 3 | 2 | 5 | 1 | 7  | 5 | 2 | 3 | 3 | 4 | 2 | 4 | 7 | 7 | 4 | 4 | 4 | 4 | 4 | 3 | 3 |
| B1273 | 2006-2010 | Dong, H. <i>et al.</i> & 22479472 | BSP5   | Tibet | 29.65 | 91.12 | 2 | 2 | 3 | 3 | 2 | 5 | 1 | 7  | 3 | 5 | 3 | 3 | 4 | 2 | 4 | 5 | 8 | 2 | 4 | 5 | 2 | 4 | 3 | 3 |
| B1274 | 2006-2010 | Dong, H. <i>et al.</i> & 22479472 | BSP4   | Tibet | 29.65 | 91.12 | 2 | 2 | 3 | 3 | 1 | 5 | 1 | 7  | 3 | 6 | 3 | 3 | 4 | 2 | 4 | 4 | 7 | 4 | 4 | 4 | 4 | 4 | 3 | 3 |
| B1275 | 2006-2010 | Dong, H. <i>et al.</i> & 22479472 | BSP4   | Tibet | 29.65 | 91.12 | 2 | 2 | 3 | 3 | 2 | 5 | 1 | 8  | 3 | 2 | 3 | 3 | 4 | 2 | 4 | 6 | 7 | 4 | 4 | 4 | 4 | 4 | 3 | 3 |
| B1276 | 2006-2010 | Dong, H. <i>et al.</i> & 22479472 | BSP1   | Tibet | 29.65 | 91.12 | 2 | 2 | 2 | 3 | 2 | 5 | 1 | 6  | 3 | 2 | 2 | 5 | 3 | 1 | 4 | 3 | 8 | 2 | 1 | 3 | 4 | 2 | 3 | 3 |
| B1277 | 2006-2010 | Dong, H. <i>et al.</i> & 22479472 | BSP4   | Tibet | 29.65 | 91.12 | 2 | 2 | 3 | 2 | 2 | 5 | 1 | 7  | 3 | 5 | 3 | 1 | 4 | 2 | 4 | 6 | 2 | 4 | 4 | 4 | 4 | 4 | 3 | 3 |
| B1278 | 2006-2010 | Dong, H. <i>et al.</i> & 22479472 | BSP4   | Tibet | 29.65 | 91.12 | 2 | 2 | 3 | 3 | 2 | 5 | 1 | 7  | 2 | 5 | 3 | 3 | 4 | 2 | 4 | 6 | 7 | 4 | 4 | 4 | 4 | 4 | 3 | 4 |
| B1279 | 2006-2010 | Dong, H. <i>et al.</i> & 22479472 | BSP4   | Tibet | 29.65 | 91.12 | 2 | 2 | 3 | 3 | 1 | 5 | 1 | 7  | 3 | 5 | 3 | 3 | 2 | 2 | 4 | 4 | 9 | 4 | 4 | 4 | 4 | 4 | 3 | 3 |
| B1280 | 2006-2010 | Dong, H. <i>et al.</i> & 22479472 | BSP4   | Tibet | 29.65 | 91.12 | 2 | 2 | 3 | 3 | 1 | 5 | 1 | 7  | 3 | 6 | 3 | 4 | 4 | 2 | 4 | 4 | 7 | 4 | 4 | 4 | 4 | 4 | 3 | 3 |
| B1281 | 2006-2010 | Dong, H. <i>et al.</i> & 22479472 | BSP5   | Tibet | 29.65 | 91.12 | 2 | 2 | 3 | 3 | 2 | 5 | 1 | 5  | 3 | 5 | 3 | 3 | 4 | 2 | 4 | 6 | 8 | 2 | 4 | 5 | 4 | 4 | 3 | 3 |
| B1282 | 2006-2010 | Dong, H. <i>et al.</i> & 22479472 | BSP4   | Tibet | 29.65 | 91.12 | 2 | 2 | 3 | 3 | 2 | 5 | 1 | 7  | 3 | 5 | 3 | 3 | 4 | 2 | 4 | 6 | 7 | 4 | 4 | 4 | 4 | 4 | 3 | 3 |
| B1283 | 2006-2010 | Dong, H. <i>et al.</i> & 22479472 | BSP4   | Tibet | 29.65 | 91.12 | 2 | 2 | 3 | 3 | 1 | 5 | 1 | 7  | 3 | 5 | 3 | 3 | 4 | 2 | 4 | 5 | 7 | 4 | 3 | 4 | 2 | 4 | 3 | 3 |
| B1284 | 2006-2010 | Dong, H. <i>et al.</i> & 22479472 | BSP1   | Tibet | 29.65 | 91.12 | 2 | 2 | 2 | 3 | 2 | 5 | 1 | 5  | 2 | 3 | 1 | 2 | 4 | 2 | 4 | 2 | 7 | 2 | 4 | 1 | 4 | 2 | 3 | 3 |
| B1285 | 2006-2010 | Dong, H. <i>et al.</i> & 22479472 | BSP4   | Tibet | 29.65 | 91.12 | 2 | 2 | 3 | 3 | 2 | 5 | 1 | 7  | 3 | 5 | 3 | 3 | 4 | 2 | 4 | 6 | 7 | 4 | 4 | 4 | 4 | 4 | 3 | 3 |
| B1286 | 2006-2010 | Dong, H. <i>et al.</i> & 22479472 | BSP5   | Tibet | 29.65 | 91.12 | 2 | 2 | 3 | 3 | 2 | 5 | 1 | 7  | 3 | 4 | 3 | 3 | 4 | 2 | 4 | 6 | 8 | 2 | 3 | 5 | 4 | 4 | 3 | 3 |
| B1287 | 2006-2010 | Dong, H. <i>et al.</i> & 22479472 | BSP4   | Tibet | 29.65 | 91.12 | 2 | 2 | 3 | 3 | 1 | 5 | 1 | 7  | 3 | 5 | 3 | 3 | 4 | 3 | 4 | 5 | 7 | 4 | 4 | 4 | 4 | 4 | 3 | 3 |
| B1288 | 2006-2010 | Dong, H. <i>et al.</i> &          | BSP4   | Tibet | 29.65 | 91.12 | 2 | 2 | 3 | 3 | 1 | 5 | 1 | 7  | 3 | 6 | 3 | 4 | 4 | 2 | 4 | 4 | 7 | 2 | 4 | 4 | 4 | 4 | 3 | 3 |



22479472

|       |           |                                   |        |          |       |       |   |   |   |   |   |   |   |   |   |   |   |   |   |   |   |   |    |   |   |   |   |   |   |   |
|-------|-----------|-----------------------------------|--------|----------|-------|-------|---|---|---|---|---|---|---|---|---|---|---|---|---|---|---|---|----|---|---|---|---|---|---|---|
| B1330 | 2006-2010 | Dong, H. <i>et al.</i> & 22479472 | BSP5   | Tibet    | 29.65 | 91.12 | 2 | 2 | 3 | 3 | 2 | 5 | 1 | 7 | 3 | 5 | 3 | 3 | 4 | 2 | 4 | 6 | 8  | 2 | 4 | 5 | 4 | 4 | 3 | 3 |
| B1331 | 2006-2010 | Dong, H. <i>et al.</i> & 22479472 | BSP1   | Tibet    | 29.65 | 91.12 | 2 | 2 | 2 | 3 | 2 | 5 | 1 | 5 | 3 | 3 | 2 | 3 | 3 | 1 | 4 | 1 | 6  | 2 | 2 | 3 | 4 | 2 | 3 | 4 |
| B1332 | 2006-2010 | Dong, H. <i>et al.</i> & 22479472 | BSPint | Tibet    | 29.65 | 91.12 | 2 | 2 | 3 | 3 | 2 | 5 | 1 | 7 | 3 | 5 | 3 | 3 | 4 | 2 | 4 | 7 | ND | 2 | 4 | 4 | 4 | 4 | 3 | 3 |
| B1333 | 2006-2010 | Dong, H. <i>et al.</i> & 22479472 | BSP5   | Tibet    | 29.65 | 91.12 | 2 | 2 | 3 | 3 | 2 | 5 | 1 | 4 | 3 | 5 | 3 | 4 | 4 | 2 | 4 | 6 | 8  | 2 | 4 | 5 | 4 | 4 | 3 | 3 |
| B1334 | 2006-2010 | Dong, H. <i>et al.</i> & 22479472 | BSP5   | Tibet    | 29.65 | 91.12 | 2 | 2 | 3 | 3 | 2 | 5 | 1 | 7 | 3 | 4 | 3 | 3 | 4 | 2 | 4 | 6 | 8  | 2 | 4 | 5 | 4 | 4 | 3 | 3 |
| B1335 | 2006-2010 | Dong, H. <i>et al.</i> & 22479472 | BSP4   | Tibet    | 29.65 | 91.12 | 2 | 2 | 3 | 3 | 2 | 5 | 1 | 7 | 3 | 5 | 3 | 3 | 4 | 2 | 4 | 6 | 7  | 4 | 4 | 4 | 4 | 4 | 3 | 3 |
| B1336 | 2006-2010 | Dong, H. <i>et al.</i> & 22479472 | BSP4   | Tibet    | 29.65 | 91.12 | 2 | 2 | 3 | 3 | 2 | 5 | 1 | 7 | 3 | 5 | 3 | 3 | 4 | 2 | 4 | 6 | 7  | 4 | 4 | 4 | 4 | 4 | 3 | 3 |
| B1337 | 2006-2010 | Dong, H. <i>et al.</i> & 22479472 | BSP5   | Tibet    | 29.65 | 91.12 | 2 | 2 | 3 | 3 | 2 | 5 | 1 | 7 | 3 | 5 | 2 | 3 | 4 | 2 | 4 | 6 | 4  | 2 | 4 | 6 | 4 | 4 | 3 | 3 |
| B1338 | 2006-2010 | Dong, H. <i>et al.</i> & 22479472 | BSP5   | Tibet    | 29.65 | 91.12 | 2 | 2 | 3 | 3 | 2 | 5 | 1 | 5 | 3 | 5 | 3 | 3 | 4 | 2 | 4 | 6 | 8  | 4 | 4 | 5 | 4 | 4 | 3 | 3 |
| B1339 | 2006-2010 | Dong, H. <i>et al.</i> & 22479472 | BSP4   | Tibet    | 29.65 | 91.12 | 2 | 2 | 3 | 3 | 1 | 5 | 1 | 7 | 3 | 6 | 3 | 3 | 4 | 2 | 4 | 5 | 7  | 2 | 4 | 4 | 4 | 4 | 3 | 3 |
| B1340 | 2006-2010 | Dong, H. <i>et al.</i> & 22479472 | BSP5   | Tibet    | 29.65 | 91.12 | 2 | 2 | 3 | 3 | 2 | 5 | 1 | 4 | 3 | 5 | 3 | 4 | 4 | 2 | 4 | 6 | 8  | 4 | 4 | 5 | 4 | 4 | 3 | 3 |
| B1341 | 2006-2010 | Dong, H. <i>et al.</i> & 22479472 | BSP4   | Tibet    | 29.65 | 91.12 | 2 | 2 | 3 | 3 | 1 | 5 | 1 | 7 | 3 | 5 | 3 | 3 | 4 | 2 | 4 | 5 | 7  | 2 | 4 | 4 | 4 | 4 | 3 | 3 |
| B1342 | 2006-2010 | Dong, H. <i>et al.</i> & 22479472 | BSP4   | Tibet    | 29.65 | 91.12 | 2 | 2 | 3 | 3 | 2 | 5 | 1 | 7 | 3 | 5 | 3 | 3 | 4 | 2 | 4 | 6 | 6  | 4 | 4 | 4 | 4 | 4 | 3 | 3 |
| B1343 | 2006-2010 | Dong, H. <i>et al.</i> & 22479472 | BSP5   | Tibet    | 29.65 | 91.12 | 2 | 2 | 3 | 3 | 2 | 5 | 1 | 7 | 3 | 5 | 3 | 3 | 4 | 2 | 4 | 5 | 6  | 2 | 4 | 5 | 4 | 4 | 3 | 3 |
| B1344 | 2006-2010 | Dong, H. <i>et al.</i> & 22479472 | BSP4   | Tibet    | 29.65 | 91.12 | 2 | 3 | 3 | 2 | 1 | 5 | 1 | 7 | 3 | 5 | 3 | 3 | 2 | 2 | 4 | 5 | 7  | 4 | 4 | 4 | 4 | 4 | 3 | 3 |
| B1345 | 2006-2010 | Dong, H. <i>et al.</i> & 22479472 | BSP4   | Tibet    | 29.65 | 91.12 | 2 | 2 | 3 | 3 | 2 | 5 | 1 | 7 | 3 | 5 | 3 | 3 | 4 | 2 | 4 | 6 | 7  | 4 | 4 | 4 | 4 | 4 | 3 | 3 |
| B1346 | 2006-2010 | Dong, H. <i>et al.</i> & 22479472 | BSP4   | Tibet    | 29.65 | 91.12 | 2 | 2 | 3 | 3 | 1 | 5 | 1 | 7 | 3 | 6 | 3 | 3 | 4 | 2 | 4 | 4 | 7  | 4 | 4 | 3 | 4 | 4 | 3 | 3 |
| B1347 | 2006-2010 | Dong, H. <i>et al.</i> & 22479472 | BSP4   | Tibet    | 29.65 | 91.12 | 2 | 2 | 3 | 3 | 1 | 5 | 1 | 7 | 3 | 6 | 3 | 4 | 4 | 2 | 4 | 4 | 7  | 4 | 4 | 4 | 4 | 4 | 3 | 3 |
| B1348 | 2006-2010 | Dong, H. <i>et al.</i> & 22479472 | BSP5   | Tibet    | 29.65 | 91.12 | 2 | 2 | 3 | 3 | 2 | 5 | 1 | 7 | 3 | 5 | 3 | 3 | 4 | 2 | 4 | 5 | 8  | 2 | 4 | 5 | 4 | 4 | 3 | 3 |
| B1349 | 2006-2010 | Dong, H. <i>et al.</i> & 22479472 | BSP4   | Tibet    | 29.65 | 91.12 | 2 | 2 | 3 | 3 | 2 | 5 | 1 | 7 | 3 | 2 | 3 | 3 | 4 | 2 | 4 | 6 | 7  | 4 | 4 | 4 | 4 | 4 | 3 | 3 |
| B1350 | 2006-2010 | Dong, H. <i>et al.</i> & 22479472 | BSP5   | Tibet    | 29.65 | 91.12 | 2 | 2 | 3 | 3 | 2 | 5 | 1 | 7 | 3 | 5 | 3 | 3 | 4 | 2 | 4 | 6 | 8  | 2 | 4 | 5 | 4 | 4 | 3 | 3 |
| B1351 | 2006-2010 | Dong, H. <i>et al.</i> & 22479472 | BSP4   | Tibet    | 29.65 | 91.12 | 2 | 2 | 3 | 3 | 2 | 5 | 1 | 7 | 3 | 5 | 3 | 3 | 4 | 2 | 4 | 6 | 7  | 4 | 4 | 4 | 4 | 4 | 3 | 3 |
| B1352 | 2006-2010 | Dong, H. <i>et al.</i> & 22479472 | BSP4   | Tibet    | 29.65 | 91.12 | 2 | 2 | 3 | 3 | 2 | 5 | 1 | 7 | 3 | 2 | 3 | 3 | 4 | 2 | 4 | 6 | 7  | 4 | 4 | 4 | 4 | 4 | 3 | 3 |
| B1353 | 2006-2010 | Dong, H. <i>et al.</i> & 22479472 | BSP4   | Tibet    | 29.65 | 91.12 | 2 | 2 | 3 | 3 | 1 | 5 | 1 | 7 | 3 | 6 | 3 | 4 | 4 | 2 | 4 | 5 | 7  | 1 | 4 | 4 | 4 | 4 | 3 | 3 |
| B1354 | 2006-2010 | Dong, H. <i>et al.</i> & 22479472 | BSP1   | Tibet    | 29.65 | 91.12 | 2 | 2 | 2 | 3 | 2 | 5 | 1 | 4 | 3 | 3 | 2 | 2 | 3 | 1 | 4 | 3 | 9  | 2 | 2 | 3 | 4 | 2 | 3 | 4 |
| B1355 | 2006-2010 | Dong, H. <i>et al.</i> & 22479472 | BSPint | Tibet    | 29.65 | 91.12 | 2 | 2 | 3 | 3 | 2 | 5 | 1 | 7 | 2 | 5 | 3 | 3 | 4 | 2 | 4 | 6 | ND | 3 | 3 | 4 | 4 | 4 | 3 | 3 |
| B1356 | 2006-2010 | Dong, H. <i>et al.</i> & 22479472 | BSP5   | Tibet    | 29.65 | 91.12 | 2 | 1 | 3 | 2 | 2 | 5 | 1 | 7 | 3 | 5 | 3 | 3 | 4 | 2 | 4 | 3 | 8  | 2 | 3 | 5 | 4 | 4 | 3 | 3 |
| B1357 | 2006-2010 | Dong, H. <i>et al.</i> & 22479472 | BSP4   | Tibet    | 29.65 | 91.12 | 2 | 2 | 3 | 3 | 2 | 5 | 1 | 7 | 3 | 2 | 3 | 3 | 4 | 2 | 4 | 6 | 7  | 4 | 4 | 4 | 4 | 4 | 3 | 3 |
| B1358 | 2006-2010 | Dong, H. <i>et al.</i> & 22479472 | BSP4   | Tibet    | 29.65 | 91.12 | 2 | 2 | 3 | 3 | 2 | 5 | 1 | 7 | 3 | 5 | 3 | 3 | 4 | 2 | 4 | 6 | 7  | 4 | 4 | 4 | 4 | 4 | 3 | 3 |
| B1359 | 2006-2010 | Dong, H. <i>et al.</i> & 22479472 | BSP5   | Tibet    | 29.65 | 91.12 | 2 | 2 | 3 | 3 | 2 | 5 | 1 | 7 | 3 | 5 | 3 | 3 | 4 | 2 | 4 | 6 | ND | 2 | 4 | 5 | 4 | 6 | 3 | 3 |
| B1360 | 2006-2010 | Dong, H. <i>et al.</i> & 22479472 | BSP4   | Tibet    | 29.65 | 91.12 | 2 | 2 | 3 | 3 | 1 | 5 | 1 | 7 | 3 | 5 | 3 | 3 | 4 | 2 | 4 | 4 | 3  | 4 | 4 | 4 | 4 | 4 | 3 | 2 |
| B1361 | 2006-2010 | Dong, H. <i>et al.</i> & 22479472 | BSP4   | Tibet    | 29.65 | 91.12 | 2 | 2 | 3 | 3 | 1 | 5 | 1 | 7 | 3 | 5 | 3 | 3 | 4 | 2 | 4 | 4 | 7  | 4 | 4 | 4 | 4 | 4 | 3 | 2 |
| B1362 | 2006-2010 | Dong, H. <i>et al.</i> & 22479472 | BSP5   | Tibet    | 29.65 | 91.12 | 2 | 2 | 3 | 3 | 2 | 5 | 1 | 2 | 3 | 5 | 3 | 3 | 4 | 2 | 4 | 6 | 8  | 2 | 4 | 5 | 4 | 4 | 3 | 3 |
| B1363 | 2006-2010 | Dong, H. <i>et al.</i> & 22479472 | BSP4   | Tibet    | 29.65 | 91.12 | 2 | 2 | 3 | 3 | 1 | 5 | 1 | 7 | 3 | 5 | 3 | 3 | 4 | 2 | 4 | 4 | 4  | 4 | 4 | 4 | 4 | 4 | 3 | 2 |
| B1364 | 2006-2010 | Dong, H. <i>et al.</i> & 22479472 | BSP4   | Tibet    | 29.65 | 91.12 | 2 | 2 | 3 | 3 | 1 | 5 | 1 | 7 | 3 | 5 | 3 | 3 | 4 | 3 | 4 | 5 | 7  | 4 | 4 | 4 | 4 | 4 | 3 | 3 |
| B1365 | 2006-2010 | Dong, H. <i>et al.</i> & 22479472 | BSP5   | Tibet    | 29.65 | 91.12 | 2 | 2 | 3 | 3 | 2 | 5 | 1 | 7 | 3 | 5 | 3 | 3 | 4 | 2 | 4 | 5 | 8  | 2 | 4 | 5 | 4 | 4 | 3 | 3 |
| B1366 | 2006-2010 | Dong, H. <i>et al.</i> & 22479472 | BSP4   | Tibet    | 29.65 | 91.12 | 2 | 2 | 3 | 3 | 2 | 5 | 1 | 8 | 3 | 2 | 3 | 3 | 4 | 2 | 4 | 7 | 7  | 4 | 4 | 4 | 4 | 4 | 3 | 3 |
| B1367 | 2006-2010 | Dong, H. <i>et al.</i> & 22479472 | BSP4   | Tibet    | 29.65 | 91.12 | 2 | 2 | 3 | 3 | 1 | 5 | 1 | 7 | 3 | 5 | 3 | 3 | 4 | 2 | 4 | 4 | 7  | 4 | 4 | 4 | 4 | 4 | 3 | 2 |
| B1368 | 2006-2010 | Dong, H. <i>et al.</i> & 22479472 | BSPint | Tibet    | 29.65 | 91.12 | 2 | 2 | 3 | 3 | 2 | 5 | 1 | 6 | 3 | 5 | 3 | 3 | 4 | 2 | 4 | 4 | 8  | 3 | 3 | 4 | 4 | 4 | 3 | 4 |
| B1369 | 2006-2010 | Dong, H. <i>et al.</i> & 22479472 | BSP4   | Tibet    | 29.65 | 91.12 | 2 | 2 | 3 | 3 | 1 | 5 | 1 | 7 | 3 | 6 | 3 | 3 | 4 | 2 | 4 | 4 | 7  | 4 | 4 | 4 | 4 | 4 | 3 | 3 |
| B1370 | 2010-2011 | Zhang, J. <i>et al.</i> &         | BSP1   | Xinjiang | 43.79 | 87.63 | 2 | 3 | 5 | 4 | 2 | 5 | 2 | 6 | 3 | 6 | 2 | 3 | 4 | 2 | 4 | 2 | 7  | 4 | 3 | 4 | 4 | 4 | 3 | 4 |



22713520

|       |           |                                    |        |          |       |        |   |   |   |   |   |   |   |   |   |   |   |   |   |   |   |   |   |   |   |   |   |   |   |   |
|-------|-----------|------------------------------------|--------|----------|-------|--------|---|---|---|---|---|---|---|---|---|---|---|---|---|---|---|---|---|---|---|---|---|---|---|---|
| B1412 | 2010-2011 | Zhang, J. <i>et al.</i> & 22713520 | BSPint | Xinjiang | 43.79 | 87.63  | 2 | 3 | 3 | 3 | 2 | 5 | 1 | 7 | 3 | 5 | 3 | 3 | 4 | 2 | 4 | 3 | 7 | 2 | 4 | 4 | 4 | 4 | 1 | 4 |
| B1413 | 2010-2011 | Zhang, J. <i>et al.</i> & 22713520 | BSPint | Xinjiang | 43.79 | 87.63  | 2 | 3 | 3 | 3 | 2 | 5 | 2 | 7 | 3 | 5 | 3 | 3 | 4 | 2 | 4 | 4 | 7 | 2 | 4 | 4 | 4 | 4 | 3 | 4 |
| B1414 | 2010-2011 | Zhang, J. <i>et al.</i> & 22713520 | BSP4   | Xinjiang | 43.79 | 87.63  | 2 | 3 | 3 | 3 | 2 | 5 | 1 | 8 | 3 | 5 | 3 | 3 | 2 | 2 | 4 | 5 | 7 | 4 | 4 | 4 | 4 | 4 | 3 | 4 |
| B1415 | 2010-2011 | Zhang, J. <i>et al.</i> & 22713520 | BSPint | Xinjiang | 43.79 | 87.63  | 2 | 3 | 3 | 3 | 2 | 5 | 1 | 6 | 3 | 5 | 3 | 3 | 4 | 2 | 4 | 4 | 8 | 3 | 4 | 4 | 4 | 4 | 3 | 4 |
| B1416 | 2010-2011 | Zhang, J. <i>et al.</i> & 22713520 | BSP2   | Xinjiang | 43.79 | 87.63  | 2 | 3 | 3 | 3 | 2 | 5 | 2 | 7 | 3 | 5 | 3 | 3 | 4 | 2 | 4 | 6 | 7 | 3 | 3 | 4 | 4 | 4 | 3 | 4 |
| B1417 | 2010-2011 | Zhang, J. <i>et al.</i> & 22713520 | BSPint | Xinjiang | 43.79 | 87.63  | 2 | 3 | 3 | 3 | 2 | 4 | 1 | 7 | 4 | 5 | 3 | 3 | 4 | 2 | 4 | 6 | 8 | 2 | 4 | 3 | 4 | 4 | 3 | 4 |
| B1418 | 2010-2011 | Zhang, J. <i>et al.</i> & 22713520 | BSPint | Xinjiang | 43.79 | 87.63  | 2 | 3 | 3 | 4 | 2 | 5 | 1 | 7 | 3 | 5 | 3 | 2 | 4 | 2 | 4 | 4 | 9 | 3 | 4 | 4 | 4 | 2 | 3 | 4 |
| B1419 | 2002-2005 | Jiao, W. <i>et al.</i> & 18199785  | BSP4   | Beijing  | 39.90 | 116.41 | 2 | 2 | 1 | 3 | 2 | 5 | 1 | 7 | 3 | 5 | 3 | 3 | 4 | 2 | 4 | 6 | 8 | 4 | 2 | 4 | 4 | 4 | 3 | 3 |
| B1420 | 2002-2005 | Jiao, W. <i>et al.</i> & 18199785  | BSP4   | Beijing  | 39.90 | 116.41 | 2 | 2 | 1 | 3 | 2 | 5 | 1 | 9 | 3 | 5 | 3 | 3 | 4 | 2 | 4 | 6 | 8 | 4 | 3 | 4 | 4 | 4 | 3 | 3 |
| B1421 | 2002-2005 | Jiao, W. <i>et al.</i> & 18199785  | BSP4   | Beijing  | 39.90 | 116.41 | 2 | 2 | 1 | 3 | 2 | 5 | 1 | 7 | 3 | 5 | 3 | 4 | 4 | 2 | 4 | 4 | 8 | 4 | 4 | 4 | 4 | 4 | 3 | 3 |
| B1422 | 2002-2005 | Jiao, W. <i>et al.</i> & 18199785  | BSP4   | Beijing  | 39.90 | 116.41 | 2 | 2 | 1 | 3 | 2 | 5 | 1 | 5 | 3 | 5 | 3 | 3 | 4 | 2 | 4 | 7 | 5 | 4 | 4 | 3 | 4 | 4 | 3 | 6 |
| B1423 | 2002-2005 | Jiao, W. <i>et al.</i> & 18199785  | BSP4   | Beijing  | 39.90 | 116.41 | 2 | 2 | 3 | 3 | 2 | 5 | 1 | 7 | 3 | 5 | 3 | 3 | 4 | 2 | 6 | 6 | 8 | 4 | 4 | 4 | 4 | 4 | 4 | 3 |
| B1424 | 2002-2005 | Jiao, W. <i>et al.</i> & 18199785  | BSP5   | Beijing  | 39.90 | 116.41 | 2 | 2 | 3 | 3 | 2 | 5 | 1 | 7 | 3 | 5 | 3 | 3 | 2 | 2 | 4 | 5 | 8 | 2 | 4 | 5 | 4 | 4 | 3 | 3 |
| B1425 | 2002-2005 | Jiao, W. <i>et al.</i> & 18199785  | BSP5   | Beijing  | 39.90 | 116.41 | 2 | 2 | 3 | 3 | 2 | 5 | 1 | 6 | 3 | 5 | 2 | 3 | 4 | 2 | 4 | 6 | 6 | 2 | 4 | 5 | 4 | 4 | 3 | 3 |
| B1426 | 2002-2005 | Jiao, W. <i>et al.</i> & 18199785  | BSP5   | Beijing  | 39.90 | 116.41 | 2 | 2 | 3 | 3 | 2 | 5 | 1 | 9 | 3 | 5 | 3 | 3 | 4 | 2 | 4 | 4 | 8 | 2 | 5 | 5 | 4 | 4 | 3 | 3 |
| B1427 | 2002-2005 | Jiao, W. <i>et al.</i> & 18199785  | BSP5   | Beijing  | 39.90 | 116.41 | 2 | 2 | 3 | 3 | 2 | 5 | 1 | 7 | 3 | 5 | 3 | 3 | 4 | 2 | 4 | 5 | 8 | 2 | 4 | 5 | 4 | 4 | 3 | 3 |
| B1428 | 2002-2005 | Jiao, W. <i>et al.</i> & 18199785  | BSP5   | Beijing  | 39.90 | 116.41 | 2 | 2 | 3 | 3 | 2 | 5 | 1 | 7 | 3 | 5 | 3 | 3 | 3 | 2 | 4 | 5 | 8 | 2 | 4 | 6 | 4 | 4 | 3 | 3 |
| B1429 | 2002-2005 | Jiao, W. <i>et al.</i> & 18199785  | BSP5   | Beijing  | 39.90 | 116.41 | 2 | 2 | 3 | 3 | 2 | 5 | 1 | 7 | 3 | 4 | 3 | 3 | 4 | 2 | 4 | 5 | 8 | 2 | 4 | 5 | 4 | 4 | 3 | 3 |
| B1430 | 2002-2005 | Jiao, W. <i>et al.</i> & 18199785  | BSP5   | Beijing  | 39.90 | 116.41 | 2 | 2 | 3 | 3 | 2 | 5 | 1 | 5 | 3 | 5 | 3 | 3 | 4 | 2 | 4 | 5 | 8 | 2 | 4 | 5 | 4 | 4 | 3 | 3 |
| B1431 | 2002-2005 | Jiao, W. <i>et al.</i> & 18199785  | BSP5   | Beijing  | 39.90 | 116.41 | 2 | 2 | 3 | 3 | 2 | 5 | 1 | 7 | 3 | 5 | 3 | 3 | 4 | 2 | 4 | 5 | 8 | 2 | 4 | 5 | 4 | 4 | 3 | 3 |
| B1432 | 2002-2005 | Jiao, W. <i>et al.</i> & 18199785  | BSP5   | Beijing  | 39.90 | 116.41 | 2 | 2 | 2 | 3 | 2 | 5 | 1 | 7 | 3 | 5 | 3 | 3 | 4 | 2 | 4 | 6 | 7 | 2 | 4 | 5 | 4 | 4 | 3 | 3 |
| B1433 | 2002-2005 | Jiao, W. <i>et al.</i> & 18199785  | BSP5   | Beijing  | 39.90 | 116.41 | 2 | 2 | 2 | 3 | 2 | 5 | 1 | 7 | 3 | 5 | 3 | 3 | 4 | 2 | 4 | 6 | 8 | 2 | 4 | 5 | 4 | 4 | 3 | 3 |
| B1434 | 2002-2005 | Jiao, W. <i>et al.</i> & 18199785  | BSP5   | Beijing  | 39.90 | 116.41 | 2 | 2 | 3 | 3 | 2 | 5 | 1 | 7 | 3 | 5 | 3 | 3 | 4 | 2 | 4 | 5 | 8 | 2 | 4 | 5 | 4 | 4 | 3 | 3 |
| B1435 | 2002-2005 | Jiao, W. <i>et al.</i> & 18199785  | BSP5   | Beijing  | 39.90 | 116.41 | 2 | 2 | 3 | 3 | 2 | 5 | 1 | 7 | 3 | 5 | 3 | 3 | 4 | 2 | 4 | 5 | 8 | 2 | 4 | 1 | 4 | 4 | 3 | 3 |
| B1436 | 2002-2005 | Jiao, W. <i>et al.</i> & 18199785  | BSP5   | Beijing  | 39.90 | 116.41 | 2 | 2 | 3 | 3 | 2 | 5 | 1 | 7 | 3 | 5 | 3 | 4 | 3 | 2 | 6 | 5 | 6 | 2 | 4 | 1 | 4 | 2 | 3 | 3 |
| B1437 | 2002-2005 | Jiao, W. <i>et al.</i> & 18199785  | BSP5   | Beijing  | 39.90 | 116.41 | 2 | 2 | 3 | 3 | 2 | 5 | 1 | 7 | 3 | 5 | 3 | 3 | 4 | 2 | 4 | 5 | 8 | 2 | 4 | 4 | 4 | 4 | 3 | 3 |
| B1438 | 2002-2005 | Jiao, W. <i>et al.</i> & 18199785  | BSP5   | Beijing  | 39.90 | 116.41 | 2 | 2 | 3 | 3 | 2 | 5 | 1 | 7 | 3 | 5 | 3 | 3 | 4 | 2 | 4 | 6 | 7 | 2 | 4 | 5 | 4 | 4 | 3 | 3 |
| B1439 | 2002-2005 | Jiao, W. <i>et al.</i> & 18199785  | BSP5   | Beijing  | 39.90 | 116.41 | 2 | 2 | 3 | 3 | 2 | 5 | 1 | 7 | 3 | 5 | 3 | 1 | 4 | 2 | 4 | 6 | 8 | 2 | 4 | 5 | 4 | 4 | 3 | 3 |
| B1440 | 2002-2005 | Jiao, W. <i>et al.</i> & 18199785  | BSP5   | Beijing  | 39.90 | 116.41 | 2 | 2 | 3 | 3 | 2 | 5 | 1 | 7 | 3 | 5 | 3 | 3 | 4 | 2 | 4 | 6 | 7 | 2 | 4 | 5 | 2 | 4 | 3 | 3 |
| B1441 | 2002-2005 | Jiao, W. <i>et al.</i> & 18199785  | BSP5   | Beijing  | 39.90 | 116.41 | 2 | 2 | 3 | 3 | 2 | 5 | 1 | 8 | 3 | 5 | 3 | 3 | 4 | 2 | 4 | 6 | 8 | 2 | 4 | 5 | 4 | 4 | 3 | 3 |
| B1442 | 2002-2005 | Jiao, W. <i>et al.</i> & 18199785  | BSP5   | Beijing  | 39.90 | 116.41 | 2 | 2 | 3 | 3 | 2 | 5 | 1 | 8 | 3 | 5 | 3 | 3 | 4 | 2 | 4 | 6 | 8 | 2 | 4 | 5 | 4 | 4 | 3 | 3 |
| B1443 | 2002-2005 | Jiao, W. <i>et al.</i> & 18199785  | BSP5   | Beijing  | 39.90 | 116.41 | 2 | 2 | 3 | 3 | 2 | 5 | 1 | 7 | 3 | 5 | 3 | 3 | 4 | 2 | 4 | 6 | 8 | 2 | 3 | 5 | 4 | 4 | 3 | 1 |
| B1444 | 2002-2005 | Jiao, W. <i>et al.</i> & 18199785  | BSP5   | Beijing  | 39.90 | 116.41 | 2 | 2 | 3 | 3 | 2 | 6 | 1 | 7 | 3 | 5 | 3 | 3 | 4 | 1 | 4 | 6 | 8 | 2 | 4 | 6 | 4 | 4 | 3 | 3 |
| B1445 | 2002-2005 | Jiao, W. <i>et al.</i> & 18199785  | BSP4   | Beijing  | 39.90 | 116.41 | 2 | 2 | 3 | 3 | 2 | 5 | 1 | 7 | 3 | 5 | 3 | 4 | 4 | 2 | 2 | 6 | 7 | 2 | 3 | 4 | 4 | 4 | 3 | 3 |
| B1446 | 2002-2005 | Jiao, W. <i>et al.</i> & 18199785  | BSP5   | Beijing  | 39.90 | 116.41 | 2 | 2 | 3 | 3 | 2 | 5 | 1 | 7 | 3 | 5 | 3 | 3 | 4 | 2 | 4 | 6 | 8 | 2 | 3 | 5 | 4 | 4 | 3 | 1 |
| B1447 | 2002-2005 | Jiao, W. <i>et al.</i> & 18199785  | BSP5   | Beijing  | 39.90 | 116.41 | 2 | 2 | 3 | 3 | 2 | 5 | 1 | 7 | 3 | 6 | 3 | 3 | 4 | 2 | 4 | 6 | 7 | 2 | 4 | 5 | 4 | 4 | 3 | 3 |
| B1448 | 2002-2005 | Jiao, W. <i>et al.</i> & 18199785  | BSPint | Beijing  | 39.90 | 116.41 | 2 | 2 | 3 | 3 | 2 | 5 | 1 | 7 | 3 | 5 | 3 | 3 | 4 | 2 | 4 | 7 | 8 | 2 | 4 | 4 | 4 | 4 | 3 | 3 |
| B1449 | 2002-2005 | Jiao, W. <i>et al.</i> & 18199785  | BSP5   | Beijing  | 39.90 | 116.41 | 2 | 2 | 3 | 3 | 2 | 5 | 1 | 7 | 3 | 5 | 3 | 3 | 4 | 2 | 4 | 6 | 8 | 2 | 4 | 5 | 4 | 4 | 3 | 3 |
| B1450 | 2002-2005 | Jiao, W. <i>et al.</i> & 18199785  | BSP5   | Beijing  | 39.90 | 116.41 | 2 | 2 | 3 | 3 | 2 | 5 | 1 | 7 | 3 | 5 | 3 | 3 | 4 | 2 | 4 | 6 | 8 | 2 | 4 | 5 | 2 | 4 | 3 | 3 |
| B1451 | 2002-2005 | Jiao, W. <i>et al.</i> & 18199785  | BSP5   | Beijing  | 39.90 | 116.41 | 2 | 2 | 3 | 3 | 2 | 5 | 1 | 7 | 3 | 5 | 3 | 3 | 4 | 2 | 4 | 6 | 7 | 2 | 4 | 5 | 4 | 4 | 3 | 3 |
| B1452 | 2002-2005 | Jiao, W. <i>et al.</i> &           | BSP5   | Beijing  | 39.90 | 116.41 | 2 | 2 | 3 | 4 | 2 | 5 | 1 | 9 | 3 | 5 | 3 | 3 | 3 | 2 | 4 | 5 | 8 | 2 | 2 | 5 | 4 | 5 | 3 | 3 |

|       |           | 18199785                          |        |         |       |        |   |   |   |   |   |   |   |   |   |   |   |   |   |   |   |   |    |   |   |   |   |   |   |   |
|-------|-----------|-----------------------------------|--------|---------|-------|--------|---|---|---|---|---|---|---|---|---|---|---|---|---|---|---|---|----|---|---|---|---|---|---|---|
| B1453 | 2002-2005 | Jiao, W. <i>et al.</i> & 18199785 | BSP5   | Beijing | 39.90 | 116.41 | 2 | 2 | 3 | 3 | 2 | 5 | 1 | 7 | 3 | 5 | 3 | 3 | 4 | 2 | 4 | 6 | 8  | 2 | 5 | 5 | 4 | 4 | 3 | 3 |
| B1454 | 2002-2005 | Jiao, W. <i>et al.</i> & 18199785 | BSP4   | Beijing | 39.90 | 116.41 | 2 | 2 | 3 | 3 | 2 | 5 | 1 | 7 | 3 | 5 | 3 | 2 | 4 | 2 | 4 | 5 | 8  | 4 | 4 | 4 | 4 | 4 | 3 | 3 |
| B1455 | 2002-2005 | Jiao, W. <i>et al.</i> & 18199785 | BSP5   | Beijing | 39.90 | 116.41 | 2 | 2 | 3 | 3 | 2 | 5 | 1 | 6 | 3 | 6 | 3 | 3 | 4 | 2 | 4 | 4 | 8  | 2 | 4 | 5 | 4 | 4 | 3 | 3 |
| B1456 | 2002-2005 | Jiao, W. <i>et al.</i> & 18199785 | BSP5   | Beijing | 39.90 | 116.41 | 2 | 2 | 3 | 3 | 2 | 5 | 1 | 7 | 3 | 5 | 3 | 3 | 4 | 2 | 4 | 4 | 8  | 2 | 4 | 3 | 4 | 4 | 3 | 3 |
| B1457 | 2002-2005 | Jiao, W. <i>et al.</i> & 18199785 | BSP5   | Beijing | 39.90 | 116.41 | 2 | 2 | 3 | 3 | 2 | 5 | 1 | 7 | 3 | 5 | 3 | 3 | 3 | 2 | 4 | 5 | 7  | 2 | 4 | 5 | 4 | 4 | 3 | 3 |
| B1458 | 2002-2005 | Jiao, W. <i>et al.</i> & 18199785 | BSP5   | Beijing | 39.90 | 116.41 | 2 | 2 | 3 | 3 | 2 | 5 | 1 | 7 | 3 | 5 | 3 | 3 | 4 | 2 | 4 | 6 | 7  | 2 | 4 | 5 | 4 | 4 | 3 | 3 |
| B1459 | 2002-2005 | Jiao, W. <i>et al.</i> & 18199785 | BSP5   | Beijing | 39.90 | 116.41 | 2 | 2 | 3 | 2 | 2 | 5 | 1 | 7 | 3 | 5 | 3 | 3 | 4 | 2 | 4 | 6 | 8  | 2 | 4 | 5 | 3 | 4 | 3 | 3 |
| B1460 | 2002-2005 | Jiao, W. <i>et al.</i> & 18199785 | BSP5   | Beijing | 39.90 | 116.41 | 2 | 2 | 3 | 3 | 1 | 5 | 1 | 7 | 3 | 5 | 3 | 3 | 3 | 2 | 4 | 3 | 3  | 2 | 4 | 5 | 4 | 4 | 3 | 3 |
| B1461 | 2002-2005 | Jiao, W. <i>et al.</i> & 18199785 | BSP5   | Beijing | 39.90 | 116.41 | 2 | 2 | 3 | 3 | 2 | 5 | 1 | 7 | 3 | 5 | 3 | 3 | 4 | 2 | 4 | 4 | 8  | 2 | 4 | 5 | 3 | 4 | 3 | 3 |
| B1462 | 2002-2005 | Jiao, W. <i>et al.</i> & 18199785 | BSP5   | Beijing | 39.90 | 116.41 | 2 | 0 | 3 | 3 | 2 | 5 | 1 | 7 | 3 | 5 | 3 | 3 | 4 | 2 | 4 | 5 | 8  | 2 | 4 | 5 | 4 | 4 | 3 | 3 |
| B1463 | 2002-2005 | Jiao, W. <i>et al.</i> & 18199785 | BSP5   | Beijing | 39.90 | 116.41 | 2 | 2 | 3 | 3 | 2 | 5 | 1 | 7 | 3 | 5 | 3 | 3 | 4 | 2 | 4 | 4 | ND | 2 | 4 | 5 | 4 | 4 | 3 | 3 |
| B1464 | 2002-2005 | Jiao, W. <i>et al.</i> & 18199785 | BSP5   | Beijing | 39.90 | 116.41 | 2 | 2 | 3 | 3 | 2 | 5 | 1 | 6 | 3 | 5 | 3 | 3 | 3 | 2 | 4 | 5 | 8  | 2 | 4 | 5 | 4 | 4 | 3 | 3 |
| B1465 | 2002-2005 | Jiao, W. <i>et al.</i> & 18199785 | BSP5   | Beijing | 39.90 | 116.41 | 2 | 0 | 3 | 3 | 2 | 5 | 1 | 7 | 3 | 4 | 3 | 3 | 4 | 2 | 4 | 5 | 8  | 1 | 4 | 5 | 4 | 4 | 3 | 3 |
| B1466 | 2002-2005 | Jiao, W. <i>et al.</i> & 18199785 | BSP5   | Beijing | 39.90 | 116.41 | 2 | 2 | 3 | 3 | 2 | 5 | 1 | 7 | 3 | 5 | 2 | 3 | 4 | 2 | 4 | 6 | 8  | 2 | 4 | 5 | 4 | 4 | 3 | 2 |
| B1467 | 2002-2005 | Jiao, W. <i>et al.</i> & 18199785 | BSP5   | Beijing | 39.90 | 116.41 | 2 | 3 | 3 | 3 | 2 | 5 | 1 | 7 | 3 | 6 | 4 | 3 | 4 | 2 | 4 | 6 | 8  | 2 | 4 | 5 | 4 | 4 | 3 | 3 |
| B1468 | 2002-2005 | Jiao, W. <i>et al.</i> & 18199785 | BSP5   | Beijing | 39.90 | 116.41 | 2 | 2 | 3 | 3 | 2 | 5 | 1 | 3 | 3 | 5 | 3 | 3 | 4 | 2 | 4 | 6 | 7  | 2 | 4 | 5 | 4 | 4 | 3 | 3 |
| B1469 | 2002-2005 | Jiao, W. <i>et al.</i> & 18199785 | BSP5   | Beijing | 39.90 | 116.41 | 2 | 1 | 3 | 3 | 2 | 5 | 1 | 7 | 2 | 5 | 2 | 3 | 4 | 2 | 4 | 6 | 8  | 2 | 4 | 4 | 4 | 4 | 3 | 3 |
| B1470 | 2002-2005 | Jiao, W. <i>et al.</i> & 18199785 | BSP5   | Beijing | 39.90 | 116.41 | 2 | 2 | 3 | 3 | 2 | 5 | 1 | 7 | 3 | 5 | 3 | 3 | 4 | 2 | 4 | 6 | 8  | 2 | 4 | 5 | 4 | 4 | 3 | 3 |
| B1471 | 2002-2005 | Jiao, W. <i>et al.</i> & 18199785 | BSP5   | Beijing | 39.90 | 116.41 | 2 | 2 | 3 | 3 | 2 | 5 | 1 | 7 | 3 | 5 | 3 | 3 | 4 | 2 | 4 | 6 | 7  | 2 | 4 | 5 | 2 | 4 | 3 | 4 |
| B1472 | 2002-2005 | Jiao, W. <i>et al.</i> & 18199785 | BSP5   | Beijing | 39.90 | 116.41 | 2 | 2 | 3 | 3 | 2 | 5 | 1 | 7 | 3 | 5 | 3 | 3 | 4 | 2 | 4 | 5 | 8  | 2 | 4 | 5 | 4 | 4 | 3 | 3 |
| B1473 | 2002-2005 | Jiao, W. <i>et al.</i> & 18199785 | BSP5   | Beijing | 39.90 | 116.41 | 2 | 2 | 3 | 3 | 2 | 5 | 1 | 7 | 3 | 5 | 3 | 3 | 4 | 2 | 4 | 5 | 8  | 2 | 4 | 5 | 4 | 4 | 3 | 3 |
| B1474 | 2002-2005 | Jiao, W. <i>et al.</i> & 18199785 | BSP5   | Beijing | 39.90 | 116.41 | 2 | 2 | 3 | 3 | 2 | 5 | 1 | 7 | 3 | 5 | 3 | 1 | 4 | 2 | 4 | 4 | 8  | 2 | 4 | 5 | 4 | 4 | 3 | 3 |
| B1475 | 2002-2005 | Jiao, W. <i>et al.</i> & 18199785 | BSP5   | Beijing | 39.90 | 116.41 | 2 | 2 | 3 | 3 | 2 | 5 | 1 | 7 | 3 | 5 | 3 | 3 | 4 | 2 | 4 | 6 | 8  | 2 | 4 | 5 | 4 | 4 | 3 | 3 |
| B1476 | 2002-2005 | Jiao, W. <i>et al.</i> & 18199785 | BSP5   | Beijing | 39.90 | 116.41 | 2 | 2 | 3 | 3 | 2 | 5 | 1 | 5 | 3 | 5 | 3 | 3 | 4 | 2 | 3 | 6 | 9  | 2 | 4 | 6 | 4 | 4 | 3 | 3 |
| B1477 | 2002-2005 | Jiao, W. <i>et al.</i> & 18199785 | BSP4   | Beijing | 39.90 | 116.41 | 2 | 2 | 3 | 3 | 2 | 5 | 1 | 6 | 3 | 5 | 4 | 4 | 4 | 2 | 4 | 7 | 9  | 2 | 4 | 4 | 4 | 3 | 3 | 3 |
| B1478 | 2002-2005 | Jiao, W. <i>et al.</i> & 18199785 | BSP4   | Beijing | 39.90 | 116.41 | 2 | 1 | 3 | 3 | 2 | 5 | 1 | 7 | 3 | 5 | 3 | 3 | 4 | 2 | 4 | 6 | 8  | 4 | 3 | 4 | 4 | 4 | 3 | 3 |
| B1479 | 2002-2005 | Jiao, W. <i>et al.</i> & 18199785 | BSP5   | Beijing | 39.90 | 116.41 | 2 | 2 | 3 | 3 | 2 | 5 | 1 | 6 | 3 | 5 | 3 | 3 | 4 | 2 | 4 | 6 | 9  | 2 | 4 | 4 | 4 | 4 | 3 | 3 |
| B1480 | 2002-2005 | Jiao, W. <i>et al.</i> & 18199785 | BSP5   | Beijing | 39.90 | 116.41 | 2 | 2 | 3 | 3 | 2 | 5 | 1 | 6 | 3 | 5 | 3 | 3 | 4 | 2 | 4 | 6 | 9  | 2 | 4 | 4 | 4 | 4 | 3 | 3 |
| B1481 | 2002-2005 | Jiao, W. <i>et al.</i> & 18199785 | BSP4   | Beijing | 39.90 | 116.41 | 2 | 2 | 3 | 2 | 2 | 5 | 1 | 7 | 3 | 5 | 3 | 3 | 3 | 2 | 4 | 7 | 8  | 4 | 2 | 4 | 4 | 4 | 3 | 3 |
| B1482 | 2002-2005 | Jiao, W. <i>et al.</i> & 18199785 | BSP4   | Beijing | 39.90 | 116.41 | 2 | 2 | 3 | 3 | 2 | 5 | 1 | 7 | 3 | 5 | 3 | 3 | 4 | 2 | 4 | 7 | ND | 4 | 4 | 4 | 4 | 4 | 3 | 3 |
| B1483 | 2002-2005 | Jiao, W. <i>et al.</i> & 18199785 | BSP4   | Beijing | 39.90 | 116.41 | 2 | 2 | 3 | 3 | 2 | 5 | 1 | 7 | 3 | 5 | 3 | 3 | 3 | 2 | 4 | 6 | 4  | 4 | 4 | 4 | 4 | 4 | 3 | 3 |
| B1484 | 2002-2005 | Jiao, W. <i>et al.</i> & 18199785 | BSP4   | Beijing | 39.90 | 116.41 | 2 | 2 | 3 | 3 | 2 | 5 | 1 | 7 | 3 | 5 | 3 | 3 | 4 | 2 | 4 | 6 | 8  | 1 | 4 | 4 | 4 | 4 | 3 | 3 |
| B1485 | 2002-2005 | Jiao, W. <i>et al.</i> & 18199785 | BSP4   | Beijing | 39.90 | 116.41 | 2 | 2 | 3 | 3 | 2 | 5 | 1 | 7 | 3 | 4 | 3 | 3 | 4 | 2 | 4 | 3 | 8  | 4 | 4 | 4 | 4 | 4 | 3 | 3 |
| B1486 | 2002-2005 | Jiao, W. <i>et al.</i> & 18199785 | BSP4   | Beijing | 39.90 | 116.41 | 2 | 2 | 3 | 3 | 2 | 5 | 1 | 7 | 3 | 4 | 3 | 3 | 3 | 2 | 4 | 3 | 8  | 4 | 4 | 4 | 4 | 4 | 3 | 3 |
| B1487 | 2002-2005 | Jiao, W. <i>et al.</i> & 18199785 | BSP4   | Beijing | 39.90 | 116.41 | 2 | 2 | 3 | 3 | 2 | 5 | 1 | 7 | 3 | 5 | 3 | 2 | 4 | 2 | 4 | 5 | 6  | 3 | 4 | 4 | 4 | 4 | 3 | 3 |
| B1488 | 2002-2005 | Jiao, W. <i>et al.</i> & 18199785 | BSP4   | Beijing | 39.90 | 116.41 | 2 | 2 | 3 | 3 | 2 | 5 | 1 | 7 | 3 | 5 | 3 | 3 | 4 | 2 | 4 | 3 | 7  | 4 | 2 | 6 | 4 | 4 | 3 | 4 |
| B1489 | 2002-2005 | Jiao, W. <i>et al.</i> & 18199785 | BSPint | Beijing | 39.90 | 116.41 | 2 | 2 | 3 | 3 | 2 | 5 | 1 | 7 | 3 | 5 | 3 | 3 | 4 | 2 | 4 | 6 | 9  | 3 | 3 | 4 | 4 | 4 | 3 | 4 |
| B1490 | 2002-2005 | Jiao, W. <i>et al.</i> & 18199785 | BSPint | Beijing | 39.90 | 116.41 | 2 | 2 | 3 | 3 | 2 | 5 | 1 | 7 | 3 | 5 | 3 | 3 | 4 | 2 | 4 | 5 | 8  | 5 | 3 | 4 | 4 | 4 | 3 | 3 |



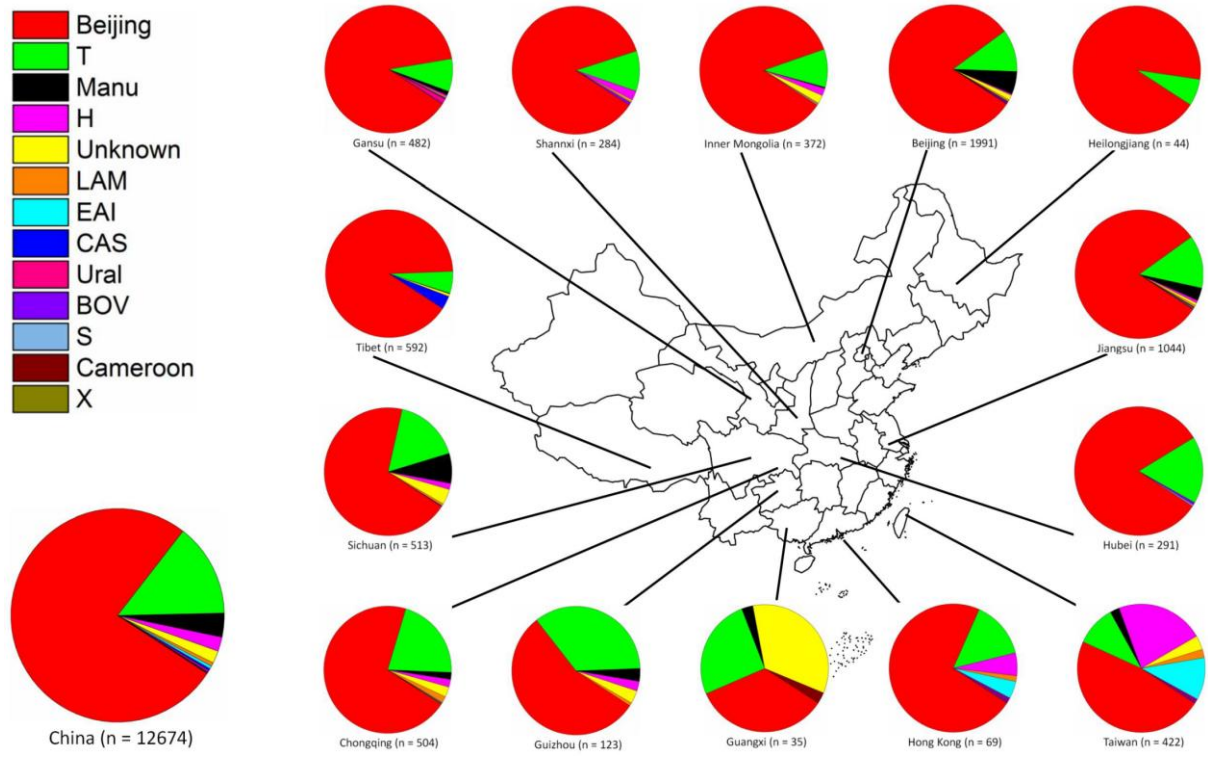

**Figure S1. Geographical distribution of *M. tuberculosis* Complex lineages in mainland China and Taiwan, classified by spoligotyping.** The map was created specifically for this investigation using the R software (R version 3.2.3, <https://www.r-project.org/>).

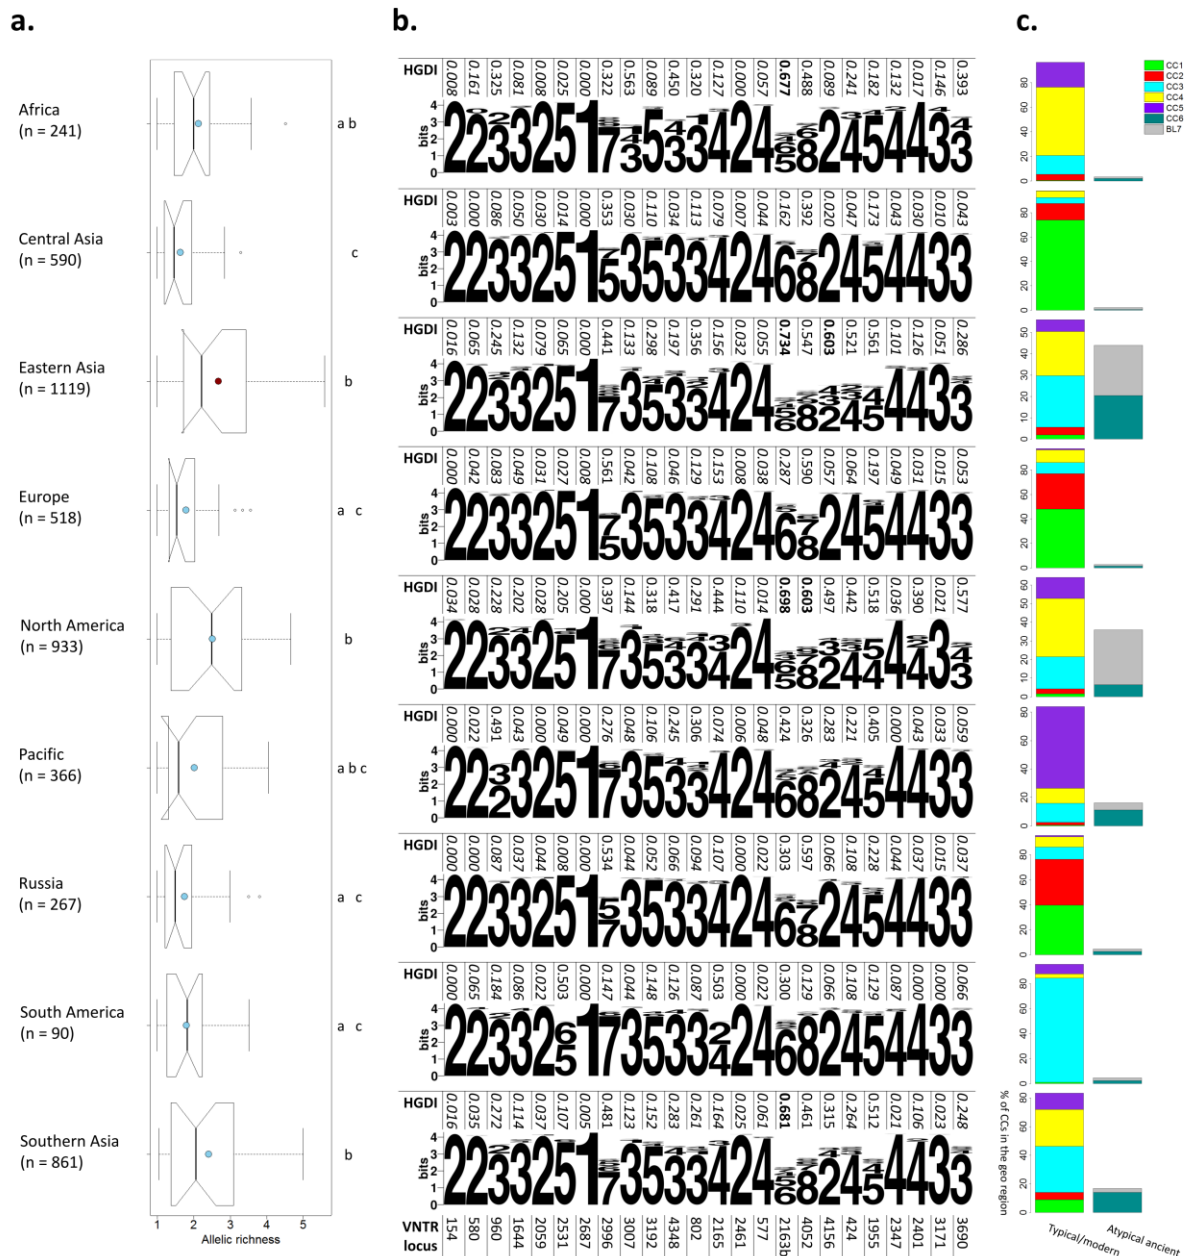

**Figure S2. The mean allelic richness of 24-loci MIRU-VNTRs and WebLogo representation to visualize main patterns observed in different geographic regions worldwide and distribution of Beijing clonal complexes. (a)** Allelic richness in each geographic region. Dots correspond to the mean allelic richness, notched boxes correspond to median values  $\pm$  quartile, bars correspond to the minimum/maximum values. Comparison tests as well as P values were estimated based on mean values by t-test (groups that have the same letter do not have significantly different means). **(b)** Logo of allele copy number of 24-loci MIRU-VNTRs in each geographic region. The allelic diversity of the loci was classified as highly discriminant ( $HGDI > 0.6$ , bold in the table), moderately discriminant ( $0.3 \leq HGDI \leq 0.6$ , normal) and poorly discriminant ( $HGDI < 0.3$ , italic). **(c)** Proportions of different CCs (CC1–CC5 comprised typical/modern Beijing strains; CC6 and BL7 comprised atypical ancestral Beijing variants) among the 9 geographic regions. Note that CC groupings and associated data are from Merker *et al.*<sup>19</sup>.

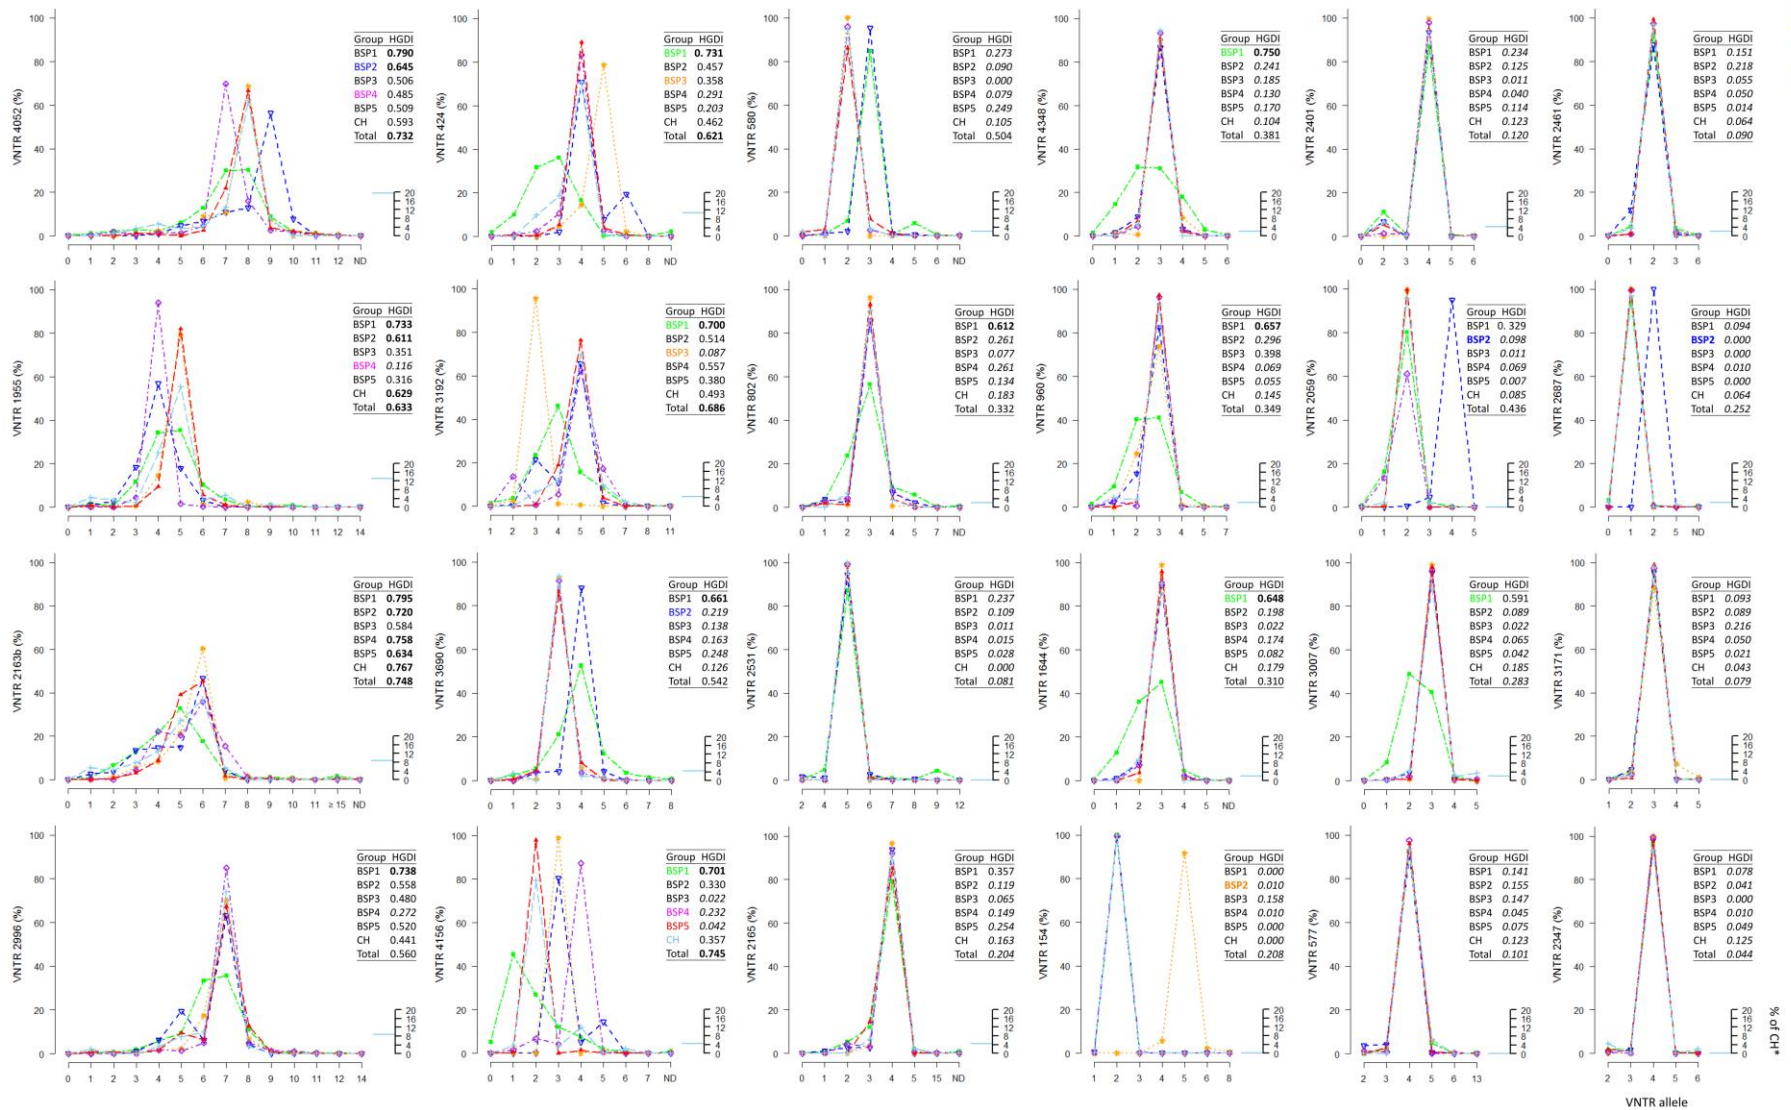

**Figure S3. The distribution of allele copy numbers for individual MIRU-VNTR loci among various BSP groupings and reported cases of clonal heterogeneity (n=92) in our dataset from China.** The figure shows percentages of Beijing strains belonging to a specific group (y axis) with a given allele copy number (x axis). The dataset analyzed contained n=1402 isolates classified as BSP1 to BSP5 (since it excluded 88/1490 BSPint isolates in undefined or intermediate position), as well as n=92 entries for clonal heterogeneity (CH) observed for 46 isolates. Note that a right y axis represents the detection rate for clonal heterogeneity, i.e., the percentage of total CH isolates that showed double alleles for a given locus. The legend within each inbox shows the Hunter-Gaston discriminatory index (HGDI) for each group. The allelic diversity of the loci was classified as highly discriminant (HGDI > 0.6, shown as “bold” in the inbox), moderately discriminant ( $0.3 \leq \text{HGDI} \leq 0.6$ , shown as “normal” in the inbox) and poorly discriminant (HGDI < 0.3, shown as “italic” in the inbox). Lastly, a color-marked group in inbox underlines statistically significant differences with others regarding the proportion of strains with contrasted number of repeats ( $P < 0.05$ ). Furthermore, if written in bold, a color-marked group indicates its specificity regarding a given repeat number.

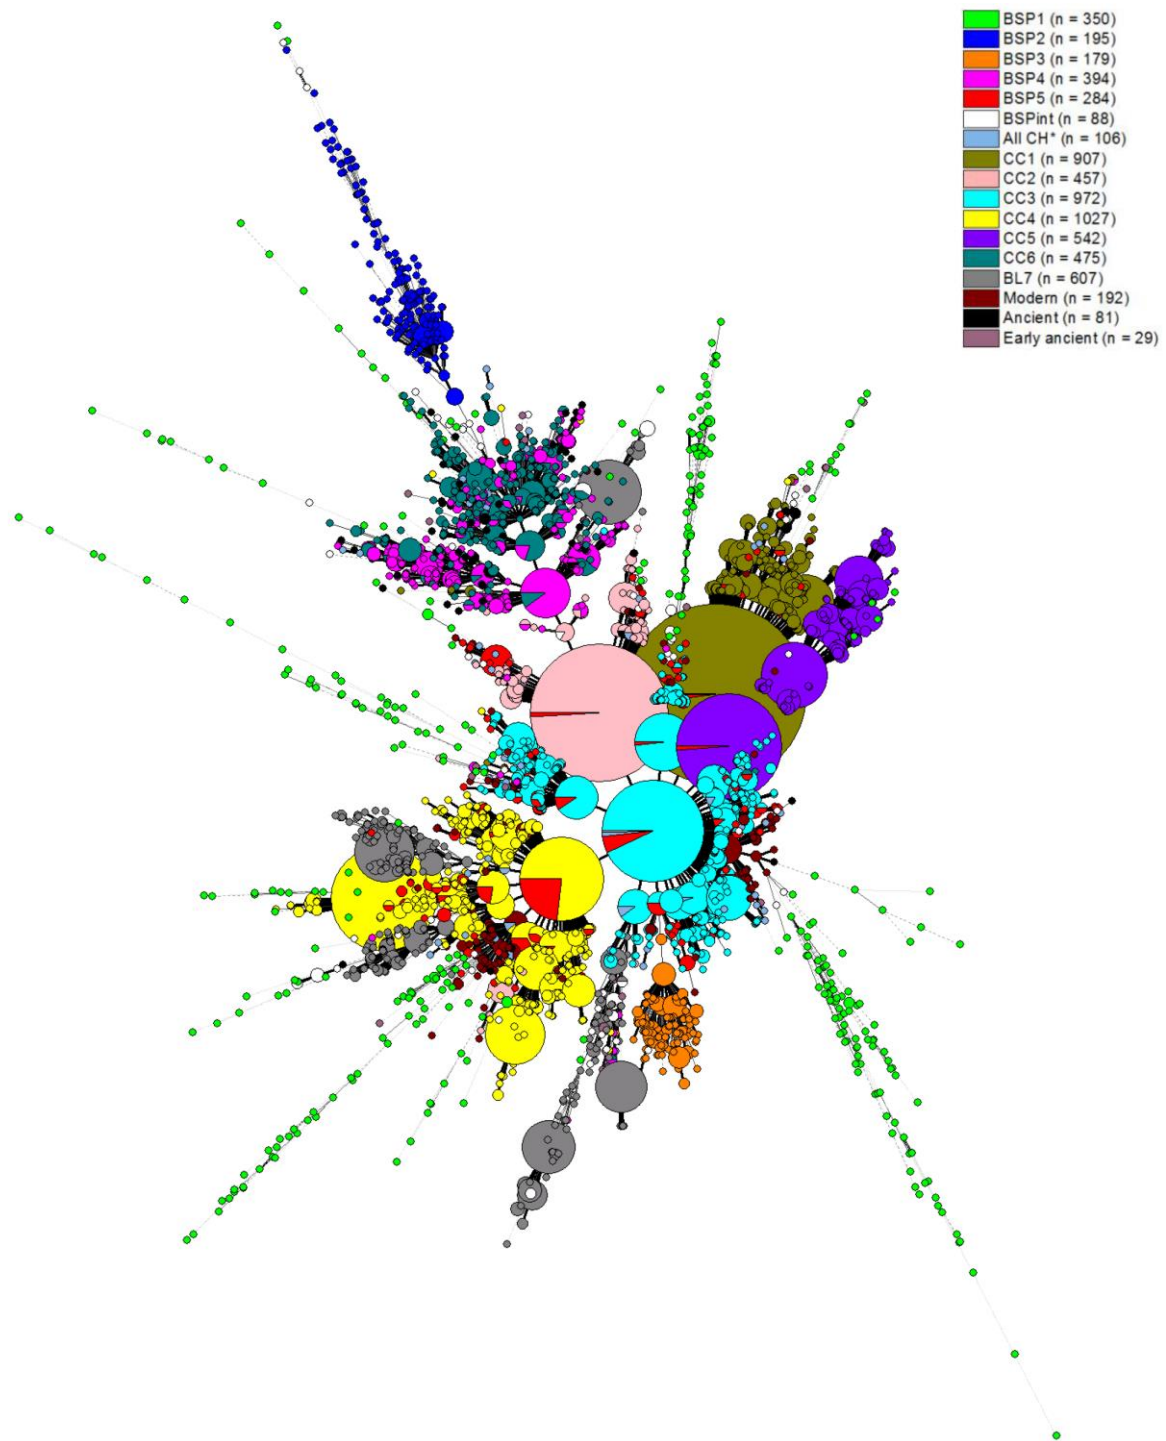

**Figure S4. A minimum spanning tree showing evolutionary relationships of different BSP groupings in the present study and Beijing clonal complexes (CCs) defined in a worldwide study, and cases of clonal heterogeneity from China.** The MST essentially shows a tree with the same dataset as in Figure 3, i.e. 6779 strains, supplemented with 106 entries corresponding to 53 strains of clonal heterogeneity. Among the latter, 46/53 strains were included in our dataset while 7/53 strains were from a recent study by Yin *et al.*<sup>20</sup>, and described as Modern (10 entries from 5 strains), Ancient (2 entries from 1 strain), and Early ancient (2 entries from 1 strain).
